# Supplementary material for: Machine Learning-Based Three-Month Outcome Prediction in Acute Ischemic Stroke: A Single Cerebrovascular-Specialty Hospital Study in South Korea
Source: MDPI journal article supplement (doi:10.3390/diagnostics11101909), 2021-10-15
Supplement: s1 [file s1]

# R Markdown

Dougho Park

Last update: 2021 8 14

```
library(caret)
library(data.table)
library(dplyr)
library(LiblineaR)
library(e1071)
library(kernlab)
library(randomForest)
library(tidyverse)
library(xgboost)
library(smotefamily)
library(GGally)
library(MLeval)
library(moonBook)

IS <- read_csv("ischemicadm.csv")

table(is.na(IS))

##
## FALSE
## 40508

IS$Outcome <- as.factor(IS$Outcome)
IS$Sex <- as.factor(IS$Sex)
IS$Onset <- as.factor(IS$Onset)
IS$Subtype <- as.factor(IS$Subtype)
IS$PRE_TIA <- as.factor(IS$PRE_TIA)
IS$PRE_STROKE <- as.factor(IS$PRE_STROKE)
IS$PRE_PAD <- as.factor(IS$PRE_PAD)
IS$PRE_CHD <- as.factor(IS$PRE_CHD)
IS$PRE_CANCER <- as.factor(IS$PRE_CANCER)
IS$PRE_HTN <- as.factor(IS$PRE_HTN)
IS$PRE_DM <- as.factor(IS$PRE_DM)
IS$PRE_HL <- as.factor(IS$PRE_HL)
IS$SMK <- as.factor(IS$SMK)
IS$PRE_AF <- as.factor(IS$PRE_AF)
IS$PRE_ANTIPLT <- as.factor(IS$PRE_ANTIPLT)
IS$PRE_ANTICOA <- as.factor(IS$PRE_ANTICOA)
IS$PSCE_high <- as.factor(IS$PSCE_high)
IS$PSCE_medium <- as.factor(IS$PSCE_medium)
IS$Circulation <- as.factor(IS$Circulation)
```

```
IS$Side <- as.factor(IS$Side)
IS$Thrombolysis <- as.factor(IS$Thrombolysis)
```

```
mytable(Outcome~., data=IS)
```

```
##
##      Descriptive Statistics by 'Outcome'
##
##      -----
##      favor      unfavor      p
##      (N=745)    (N=321)
##      -----
## Sex                                0.000
##   - Female      251 (33.7%)    156 (48.6%)
##   - Male        494 (66.3%)    165 (51.4%)
## Onset                                0.082
##   - Clear       605 (81.2%)    245 (76.3%)
##   - Unclear     140 (18.8%)    76 (23.7%)
## Subtype                                0.066
##   - CE          79 (10.6%)    40 (12.5%)
##   - LAA         280 (37.6%)    143 (44.5%)
##   - SVO         289 (38.8%)    106 (33.0%)
##   - Undertermined 97 (13.0%)   32 (10.0%)
## PRE_TIA                                0.633
##   - 0           731 (98.1%)    317 (98.8%)
##   - 1           14 ( 1.9%)     4 ( 1.2%)
## PRE_STROKE                                0.785
##   - 0           640 (85.9%)    270 (84.1%)
##   - 1           17 ( 2.3%)     9 ( 2.8%)
##   - 2           85 (11.4%)    40 (12.5%)
##   - 3            2 ( 0.3%)     2 ( 0.6%)
##   - 4            1 ( 0.1%)     0 ( 0.0%)
## PRE_PAD                                0.746
##   - 0           741 (99.5%)    318 (99.1%)
##   - 1            4 ( 0.5%)     3 ( 0.9%)
## PRE_CHD                                0.337
##   - 0           673 (90.3%)    283 (88.2%)
##   - 1           72 ( 9.7%)    38 (11.8%)
## PRE_CANCER                                0.868
##   - 0           736 (98.8%)    316 (98.4%)
##   - 1            9 ( 1.2%)     5 ( 1.6%)
## PRE_HTN                                0.224
##   - 0           293 (39.3%)    109 (34.0%)
##   - 1           395 (53.0%)    188 (58.6%)
##   - 2           57 ( 7.7%)    24 ( 7.5%)
## PRE_DM                                0.087
##   - 0           556 (74.6%)    223 (69.5%)
##   - 1           159 (21.3%)    88 (27.4%)
##   - 2           30 ( 4.0%)    10 ( 3.1%)
## PRE_HL                                0.650
```

|    |              |               |               |       |
|----|--------------|---------------|---------------|-------|
| ## | - 0          | 278 (37.3%)   | 122 (38.0%)   |       |
| ## | - 1          | 222 (29.8%)   | 87 (27.1%)    |       |
| ## | - 2          | 245 (32.9%)   | 112 (34.9%)   |       |
| ## | SMK          |               |               | 0.002 |
| ## | - 0          | 499 (67.0%)   | 252 (78.5%)   |       |
| ## | - 1          | 242 (32.5%)   | 69 (21.5%)    |       |
| ## | - 2          | 2 ( 0.3%)     | 0 ( 0.0%)     |       |
| ## | - 3          | 2 ( 0.3%)     | 0 ( 0.0%)     |       |
| ## | PRE_AF       |               |               | 0.009 |
| ## | - 0          | 658 (88.3%)   | 261 (81.3%)   |       |
| ## | - 1          | 41 ( 5.5%)    | 30 ( 9.3%)    |       |
| ## | - 2          | 46 ( 6.2%)    | 30 ( 9.3%)    |       |
| ## | PRE_ANTIPLT  |               |               | 0.950 |
| ## | - 0          | 554 (74.4%)   | 240 (74.8%)   |       |
| ## | - 1          | 191 (25.6%)   | 81 (25.2%)    |       |
| ## | PRE_ANTICOA  |               |               | 0.170 |
| ## | - 0          | 726 (97.4%)   | 307 (95.6%)   |       |
| ## | - 1          | 19 ( 2.6%)    | 14 ( 4.4%)    |       |
| ## | PSCE_high    |               |               | 1.000 |
| ## | - 0          | 725 (97.3%)   | 313 (97.5%)   |       |
| ## | - 1          | 20 ( 2.7%)    | 8 ( 2.5%)     |       |
| ## | PSCE_medium  |               |               | 0.721 |
| ## | - 0          | 711 (95.4%)   | 304 (94.7%)   |       |
| ## | - 1          | 34 ( 4.6%)    | 17 ( 5.3%)    |       |
| ## | Circulation  |               |               | 0.097 |
| ## | - 1          | 521 (69.9%)   | 244 (76.0%)   |       |
| ## | - 2          | 223 (29.9%)   | 76 (23.7%)    |       |
| ## | - 3          | 1 ( 0.1%)     | 1 ( 0.3%)     |       |
| ## | Side         |               |               | 0.264 |
| ## | - 1          | 350 (47.0%)   | 153 (47.7%)   |       |
| ## | - 2          | 341 (45.8%)   | 136 (42.4%)   |       |
| ## | - 3          | 54 ( 7.2%)    | 32 (10.0%)    |       |
| ## | Thrombolysis |               |               | 0.000 |
| ## | - 0          | 673 (90.3%)   | 254 (79.1%)   |       |
| ## | - 1          | 13 ( 1.7%)    | 10 ( 3.1%)    |       |
| ## | - 2          | 38 ( 5.1%)    | 42 (13.1%)    |       |
| ## | - 3          | 21 ( 2.8%)    | 15 ( 4.7%)    |       |
| ## | Age          | 65.8 ± 11.3   | 74.4 ± 11.4   | 0.000 |
| ## | Arrival      | 1.4 ± 1.6     | 1.2 ± 1.5     | 0.120 |
| ## | BMI          | 24.2 ± 3.1    | 23.8 ± 3.5    | 0.060 |
| ## | AC           | 85.2 ± 9.2    | 84.6 ± 10.2   | 0.310 |
| ## | NIHSS_adm    | 2.3 ± 3.2     | 6.3 ± 5.9     | 0.000 |
| ## | SBP          | 156.6 ± 27.0  | 159.0 ± 26.1  | 0.179 |
| ## | DBP          | 87.6 ± 15.4   | 87.1 ± 16.3   | 0.609 |
| ## | Hb           | 14.1 ± 1.7    | 13.4 ± 1.9    | 0.000 |
| ## | PLT          | 238.3 ± 66.1  | 231.5 ± 68.6  | 0.125 |
| ## | TC           | 191.8 ± 46.5  | 188.6 ± 48.4  | 0.305 |
| ## | HDL          | 49.3 ± 12.2   | 48.1 ± 11.6   | 0.135 |
| ## | TG           | 166.4 ± 131.4 | 141.2 ± 127.2 | 0.004 |

```
## LDL 109.4 ± 40.6 113.0 ± 42.6 0.189
## RanGlu 140.8 ± 57.1 149.7 ± 62.6 0.028
## BUN 16.4 ± 5.4 17.7 ± 7.6 0.007
## Cr 0.9 ± 0.3 0.9 ± 0.4 0.389
## HbA1C 6.2 ± 1.2 6.4 ± 1.4 0.077
## -----
```

```
predata<-IS
nearZeroVar(predata)
```

```
## [1] 5 7 9 16 17 18
```

```
predata$PRE_TIA=NULL
predata$PRE_PAD=NULL
predata$PRE_CANCER=NULL
predata$PRE_ANTICOA=NULL
predata$PSCE_high=NULL
predata$PSCE_medium=NULL
```

```
findCorrelation(cor(predata[,16:32]), cutoff = .90)
```

```
## integer(0)
```

```
ggpairs(predata[,16:32], lower=list(continuous="smooth"))
```

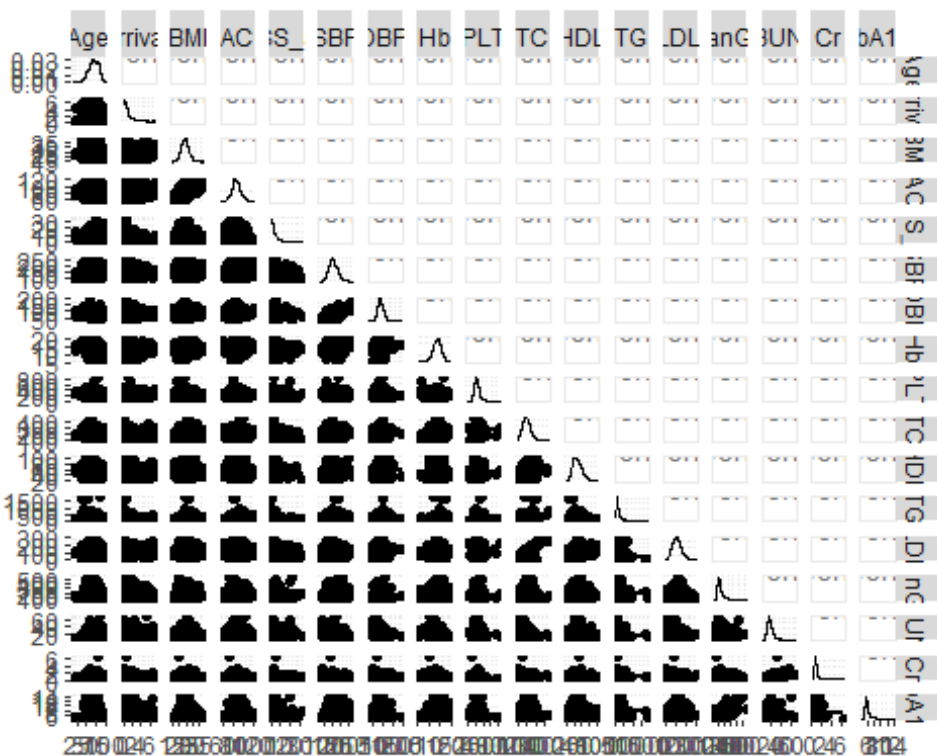

```
st_model<-preProcess(predata[,16:32], method=c("center","scale"))
data<-predict(st_model, predata)
```

```

data=as.data.frame(data)

ohe_feats = c('Sex','Onset','Subtype','PRE_STROKE','PRE_CHD','PRE HTN','PRE_D
M','PRE_HL','SMK','PRE_AF','PRE_ANTIPLT','Circulation','Side','Thrombolysis')

dummies = dummyVars(~ Sex+Onset+Subtype+PRE_STROKE+PRE_CHD+PRE HTN+PRE_DM+PRE
_HL+SMK+PRE_AF+PRE_ANTIPLT+Circulation+Side+Thrombolysis, data = data)

df_ohe <- as.data.frame(predict(dummies, newdata = data))
df_combined <- cbind(data[, -c(which(colnames(data) %in% ohe_feats))], df_ohe)
dat = as.data.table(df_combined)

str(dat)

## Classes 'data.table' and 'data.frame': 1066 obs. of 61 variables:
## $ Outcome : Factor w/ 2 levels "favor","unfavor": 2 1 1 2 1
1 1 2 2 2 ...
## $ Age : num 2.058 -1.703 0.721 -1.285 -0.199 ...
## $ Arrival : num 0.823 0.338 -0.398 0.188 -0.804 ...
## $ BMI : num -1.628 0.318 -0.546 0.706 -0.811 ...
## $ AC : num -1.888 -1.574 -0.319 1.251 -1.051 ...
## $ NIHSS_adm : num -0.542 -0.324 -0.76 -0.324 -0.76 ...
## $ SBP : num -0.349 1.108 -1.134 -1.246 1.257 ...
## $ DBP : num -1.114 1.2439 -0.0306 -0.7316 0.2243 ...
## $ Hb : num -1.447 -0.169 0.109 -0.613 0.276 ...
## $ PLT : num 0.0555 2.1472 -2.0362 -1.3191 0.7129 ...
## $ TC : num -0.634 -0.443 0.62 1.916 0.365 ...
## $ HDL : num -0.741 1.175 0.759 0.759 -1.157 ...
## $ TG : num -0.481 -0.251 -0.381 -0.175 -0.152 ...
## $ LDL : num -0.205 -0.689 0.716 2.073 0.837 ...
## $ RanGlu : num -0.704 -0.263 -0.398 -0.212 0.451 ...
## $ BUN : num -0.323 -0.112 -0.762 -0.795 -0.486 ...
## $ Cr : num -0.76 0.123 0.123 -0.466 -0.171 ...
## $ HbA1C : num -0.709 0.183 -0.466 -0.547 1.805 ...
## $ Sex.Female : num 1 1 0 1 0 1 1 1 0 0 ...
## $ Sex.Male : num 0 0 1 0 1 0 0 0 1 1 ...
## $ Onset.Clear : num 0 1 1 0 1 1 1 1 1 1 ...
## $ Onset.Unclear : num 1 0 0 1 0 0 0 0 0 0 ...
## $ Subtype.CE : num 1 0 1 1 0 0 0 0 0 1 ...
## $ Subtype.LAA : num 0 0 0 0 1 1 0 1 0 0 ...
## $ Subtype.SVO : num 0 1 0 0 0 0 1 0 1 0 ...
## $ Subtype.Undertermined : num 0 0 0 0 0 0 0 0 0 0 ...
## $ PRE_STROKE.0 : num 0 0 0 1 1 1 1 1 1 1 ...
## $ PRE_STROKE.1 : num 0 1 1 0 0 0 0 0 0 0 ...
## $ PRE_STROKE.2 : num 1 0 0 0 0 0 0 0 0 0 ...
## $ PRE_STROKE.3 : num 0 0 0 0 0 0 0 0 0 0 ...
## $ PRE_STROKE.4 : num 0 0 0 0 0 0 0 0 0 0 ...
## $ PRE_CHD.0 : num 0 1 1 1 1 1 1 1 1 1 ...

```

```
## $ PRE_CHD.1 : num 1 0 0 0 0 0 0 0 0 0 ...
## $ PRE_HTN.0 : num 1 0 1 1 0 0 1 0 1 1 ...
## $ PRE_HTN.1 : num 0 1 0 0 1 1 0 1 0 0 ...
## $ PRE_HTN.2 : num 0 0 0 0 0 0 0 0 0 0 ...
## $ PRE_DM.0 : num 1 0 1 1 0 1 1 0 1 1 ...
## $ PRE_DM.1 : num 0 1 0 0 1 0 0 1 0 0 ...
## $ PRE_DM.2 : num 0 0 0 0 0 0 0 0 0 0 ...
## $ PRE_HL.0 : num 1 0 1 1 0 1 0 0 1 1 ...
## $ PRE_HL.1 : num 0 1 0 0 1 0 0 1 0 0 ...
## $ PRE_HL.2 : num 0 0 0 0 0 0 1 0 0 0 ...
## $ SMK.0 : num 1 1 1 1 1 1 1 1 0 1 ...
## $ SMK.1 : num 0 0 0 0 0 0 0 0 1 0 ...
## $ SMK.2 : num 0 0 0 0 0 0 0 0 0 0 ...
## $ SMK.3 : num 0 0 0 0 0 0 0 0 0 0 ...
## $ PRE_AF.0 : num 0 1 1 1 1 1 1 1 1 0 ...
## $ PRE_AF.1 : num 0 0 0 0 0 0 0 0 0 0 ...
## $ PRE_AF.2 : num 1 0 0 0 0 0 0 0 0 1 ...
## $ PRE_ANTIPLT.0 : num 1 1 1 1 1 0 1 1 1 1 ...
## $ PRE_ANTIPLT.1 : num 0 0 0 0 0 1 0 0 0 0 ...
## $ Circulation.1 : num 1 1 1 1 0 0 1 1 1 1 ...
## $ Circulation.2 : num 0 0 0 0 1 1 0 0 0 0 ...
## $ Circulation.3 : num 0 0 0 0 0 0 0 0 0 0 ...
## $ Side.1 : num 1 0 0 0 1 1 1 0 0 0 ...
## $ Side.2 : num 0 1 1 0 0 0 0 1 1 0 ...
## $ Side.3 : num 0 0 0 1 0 0 0 0 0 1 ...
## $ Thrombolysis.0 : num 1 1 1 1 1 1 1 1 1 1 ...
## $ Thrombolysis.1 : num 0 0 0 0 0 0 0 0 0 0 ...
## $ Thrombolysis.2 : num 0 0 0 0 0 0 0 0 0 0 ...
## $ Thrombolysis.3 : num 0 0 0 0 0 0 0 0 0 0 ...
## - attr(*, ".internal.selfref")=<externalptr>
```

```
table(dat$Outcome)
```

```
##
##      favor unfavor
##      745      321
```

```
seed<-111
set.seed(seed)
ind<-sample(2,nrow(dat),replace = T,prob = c(0.7,0.3))
traindata<-dat[ind==1,]
testdata<-dat[ind==2,]
```

```
table(traindata$Outcome)
```

```
##
##      favor unfavor
##      537      232
```

```

ctrl <- trainControl(method = "repeatedcv", number = 10, repeats = 10,
                     savePredictions = TRUE, classProbs = TRUE,
                     summaryFunction = twoClassSummary)
metric <- "ROC"

xgbgrid <- expand.grid(nrounds= c(500, 1000, 1500),
                      max_depth=c(6, 8),
                      eta=c(0.1, 0.01), gamma=0,
                      colsample_bytree=0.6,
                      min_child_weight=1, subsample=0.8)

set.seed(seed)
traindata.smote <- SMOTE(traindata[, -1], traindata$Outcome ,K = 5, dup_size=
0)
traindata.smote <- traindata.smote$data
traindata.smote$class <- as.factor(traindata.smote$class)
table(traindata.smote$class)

##
## unfavor    favor
##      464      537

set.seed(seed)
rf_fit_smote1 <- train(class~., data = traindata.smote, method = "rf",
                      trControl=ctrl, metric=metric, tuneLength=10,
                      ntree=500, verbose=FALSE)

rf_fit_smote1

## Random Forest
##
## 1001 samples
## 60 predictor
## 2 classes: 'unfavor', 'favor'
##
## No pre-processing
## Resampling: Cross-Validated (10 fold, repeated 10 times)
## Summary of sample sizes: 901, 902, 901, 901, 901, 900, ...
## Resampling results across tuning parameters:
##
##  mtry  ROC      Sens      Spec
##    2   0.9199657 0.7099029 0.9306115
##    8   0.9291899 0.7987558 0.8739064
##   14   0.9262879 0.8188205 0.8567610
##   21   0.9214709 0.8213922 0.8455556
##   27   0.9185057 0.8213737 0.8412928
##   34   0.9158942 0.8201064 0.8381272
##   40   0.9134774 0.8186031 0.8349686

```

```
## 47 0.9103823 0.8179371 0.8276730
## 53 0.9082809 0.8166374 0.8271069
## 60 0.9068093 0.8179278 0.8261950
##
## ROC was used to select the optimal model using the largest value.
## The final value used for the model was mtry = 8.
xsmote1 <- evalm(rf_fit_smote1)
```



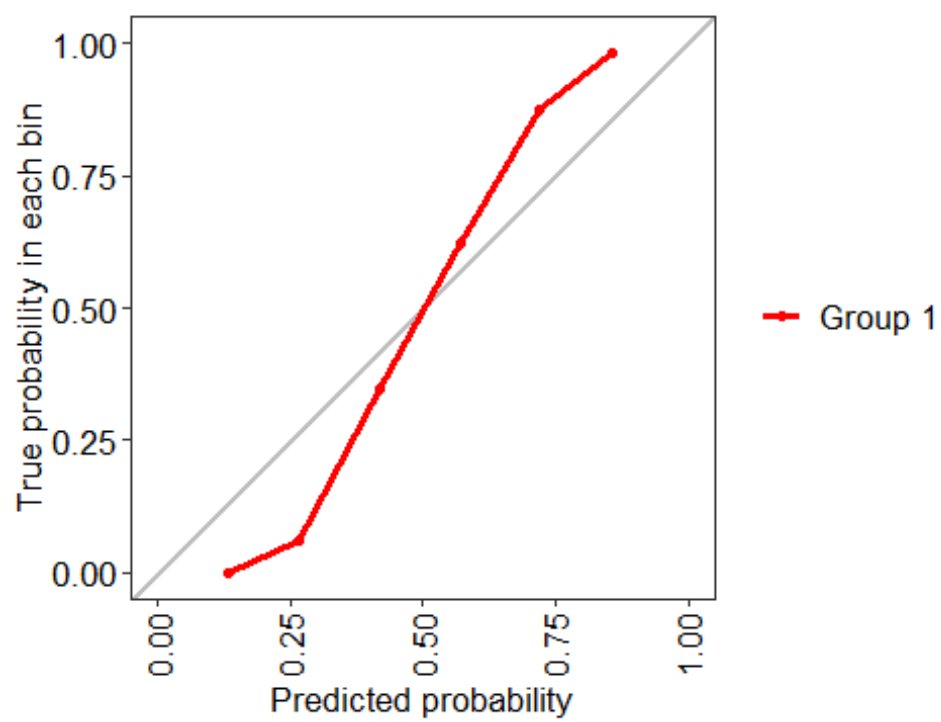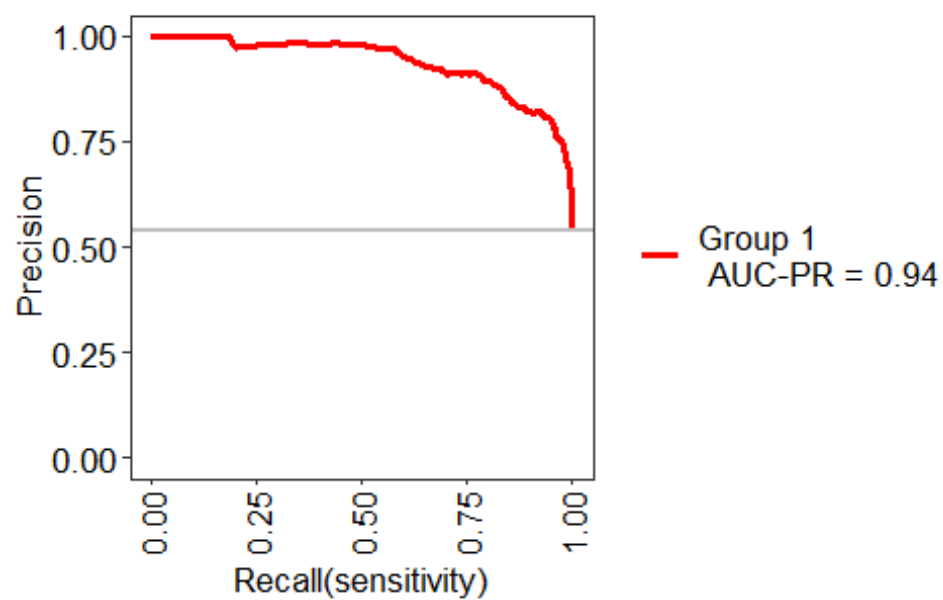

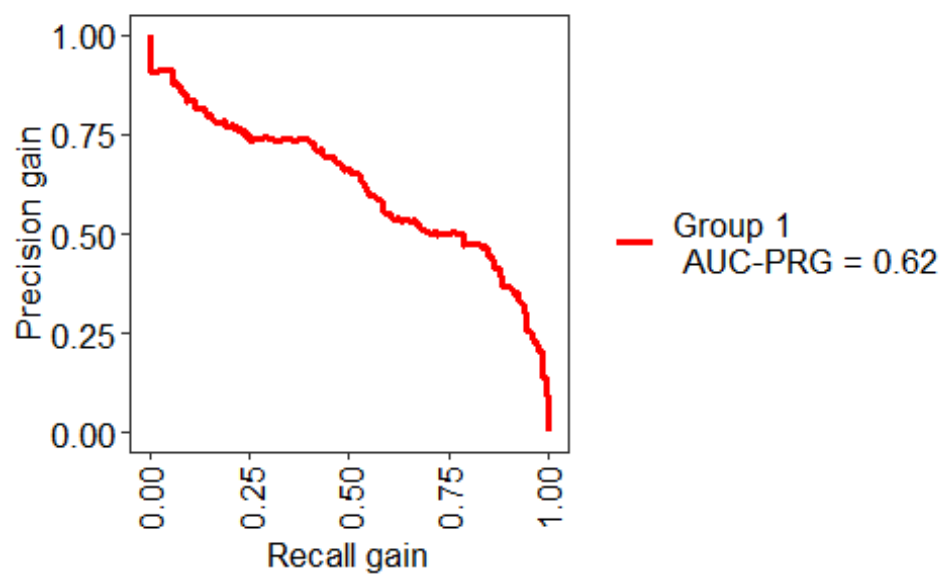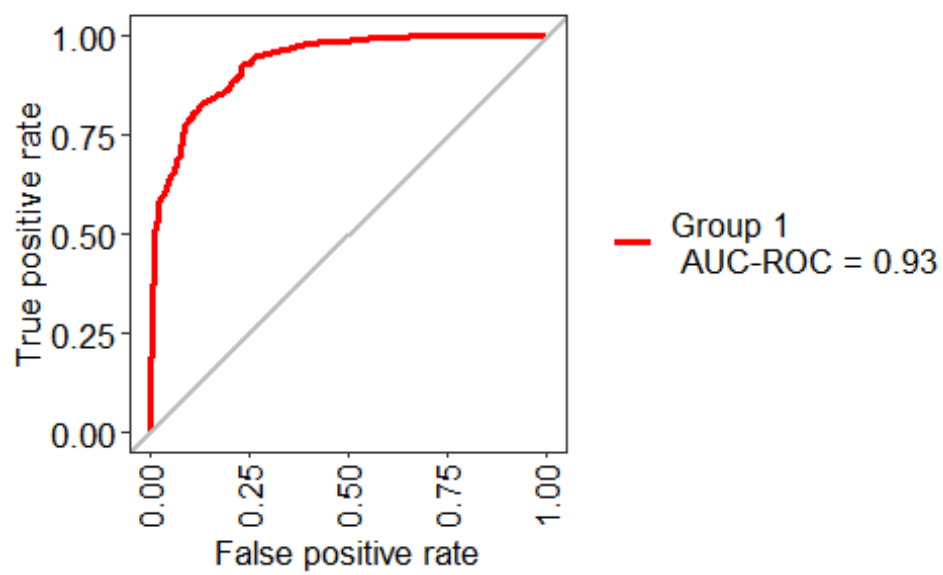

xsmote1\$stdres

```

## `$`Group 1`
##           Score      CI
## SENS      0.872  0.84-0.9
## SPEC      0.797  0.76-0.83
## MCC       0.672    <NA>
## Informedness 0.669    <NA>
## PREC      0.833  0.8-0.86
## NPV       0.843  0.81-0.87
## FPR       0.203    <NA>
## F1        0.852    <NA>
## TP        468.000    <NA>
## FP        94.000    <NA>
## TN        370.000    <NA>
## FN        69.000    <NA>
## AUC-ROC    0.930  0.91-0.95
## AUC-PR     0.940    <NA>
## AUC-PRG    0.620    <NA>

test_pred_rfsmote1 <- predict(rf_fit_smote1, newdata = testdata)
confusionMatrix(test_pred_rfsmote1, testdata$Outcome)

## Confusion Matrix and Statistics
##
##           Reference
## Prediction favor unfavor
##   favor      183      43
##   unfavor     25      46
##
##           Accuracy : 0.771
##           95% CI : (0.719, 0.8176)
##   No Information Rate : 0.7003
##   P-Value [Acc > NIR] : 0.003986
##
##           Kappa : 0.421
##
##  Mcnemar's Test P-Value : 0.039250
##
##           Sensitivity : 0.8798
##           Specificity : 0.5169
##   Pos Pred Value : 0.8097
##   Neg Pred Value : 0.6479
##   Prevalence : 0.7003
##   Detection Rate : 0.6162
##   Detection Prevalence : 0.7609
##   Balanced Accuracy : 0.6983
##
##   'Positive' Class : favor
##

```

```
test_prob_smote1 <- predict(rf_fit_smote1, newdata = testdata, type="prob")
msmote1 = data.frame(test_prob_smote1, testdata$Outcome)
ysmote1<-evalm(msmote1)
```

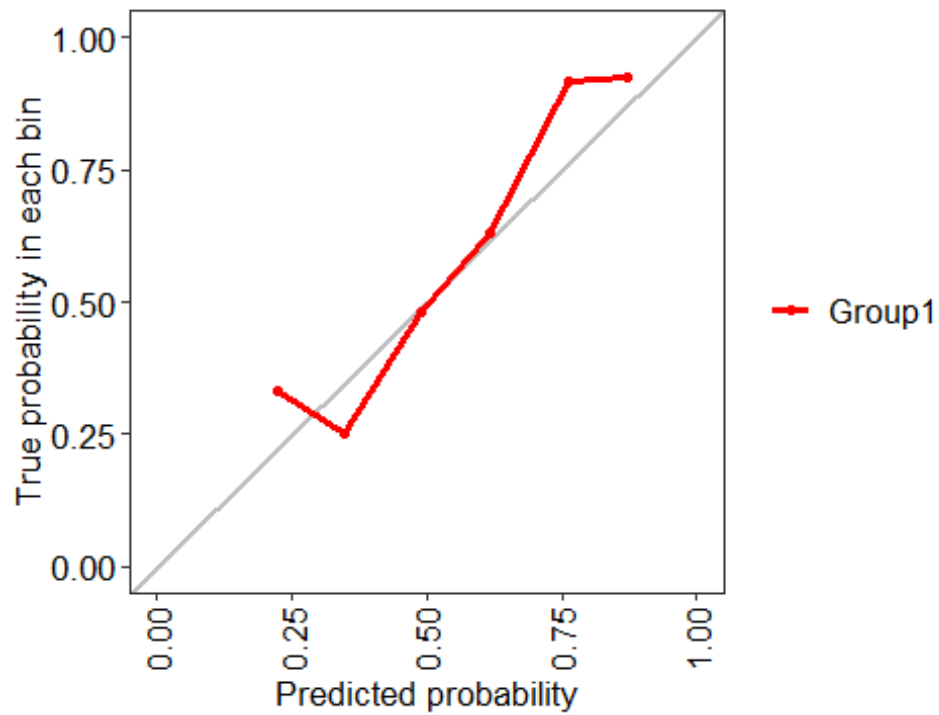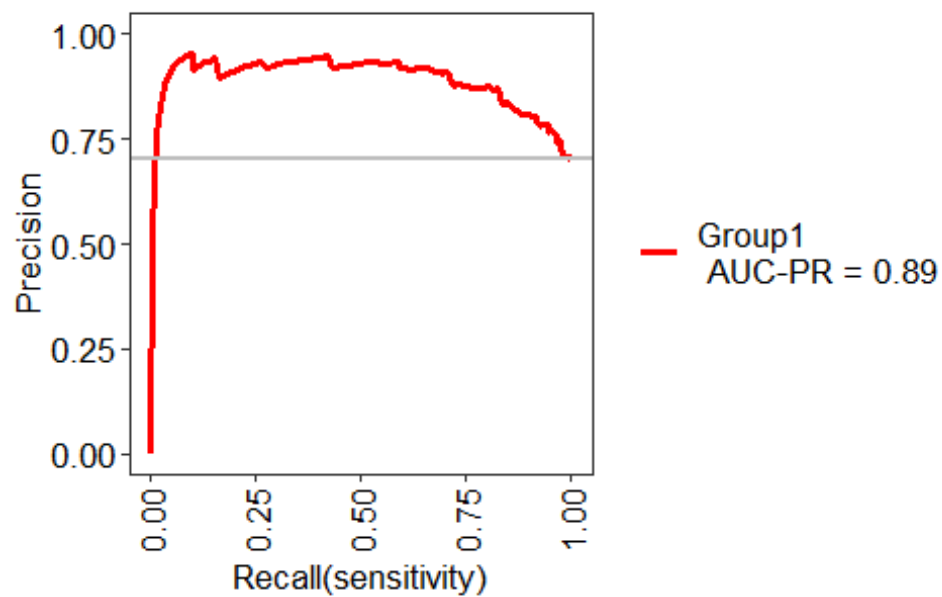

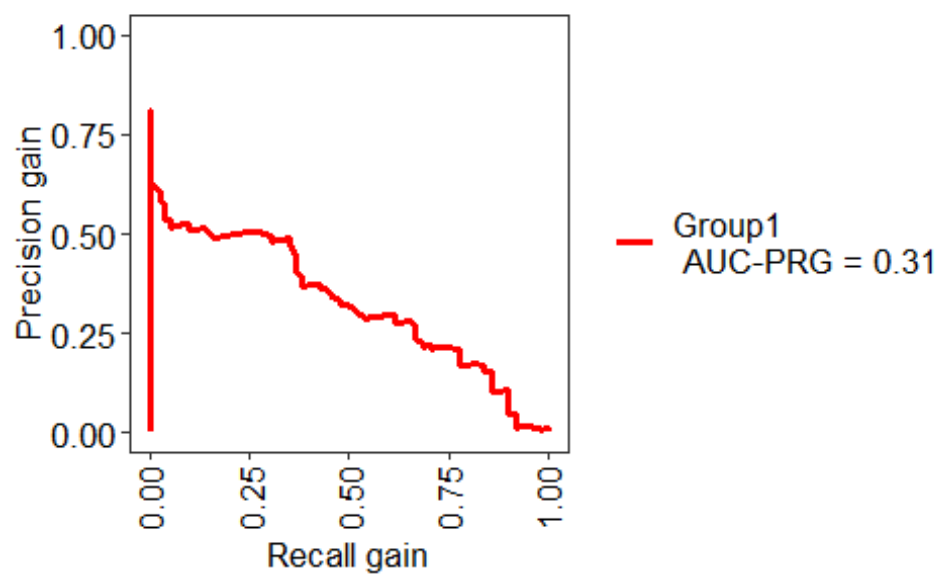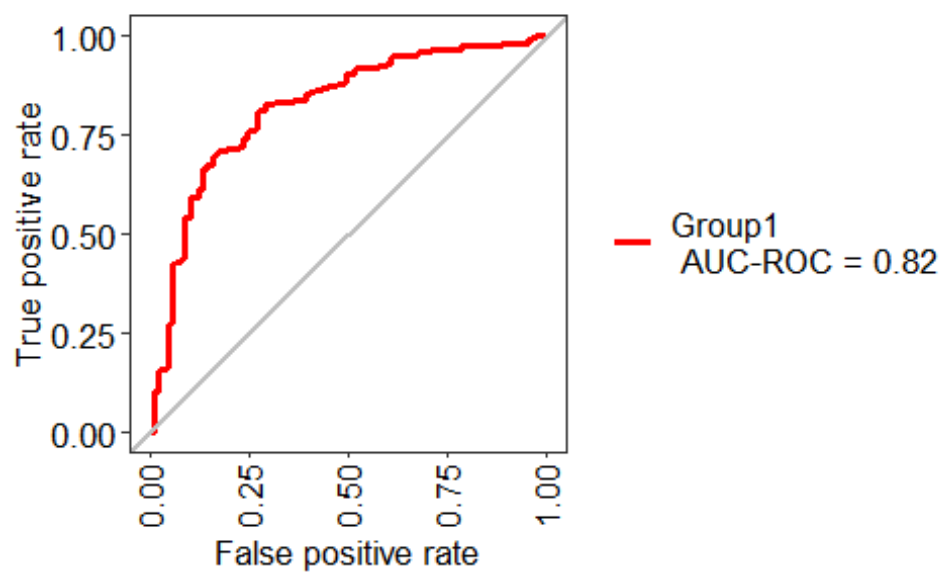

ysmote1\$stdres

```

## $Group1
##           Score      CI
## SENS      0.880 0.83-0.92
## SPEC      0.517 0.41-0.62
## MCC       0.426    <NA>
## Informedness 0.397    <NA>
## PREC      0.810 0.75-0.86
## NPV       0.648 0.53-0.75
## FPR       0.483    <NA>
## F1        0.843    <NA>
## TP       183.000    <NA>
## FP       43.000    <NA>
## TN       46.000    <NA>
## FN       25.000    <NA>
## AUC-ROC    0.820 0.77-0.87
## AUC-PR     0.890    <NA>
## AUC-PRG    0.310    <NA>

imp_smote1<-varImp(rf_fit_smote1, scale = FALSE)
imp_smote1

## rf variable importance
##
##   only 20 most important variables shown (out of 60)
##
##           Overall
## NIHSS_adm  76.830
## Age       43.356
## Hb        20.169
## Arrival   19.376
## RanGlu    18.253
## TG        17.397
## BMI       16.326
## PLT       16.285
## HDL       16.091
## LDL       15.764
## BUN       15.634
## DBP       15.322
## HbA1C     15.283
## TC        15.225
## SBP       14.816
## AC        13.752
## Cr        12.562
## SMK.1     7.084
## Sex.Male   7.063
## Sex.Female 6.413

plot(imp_smote1)

```

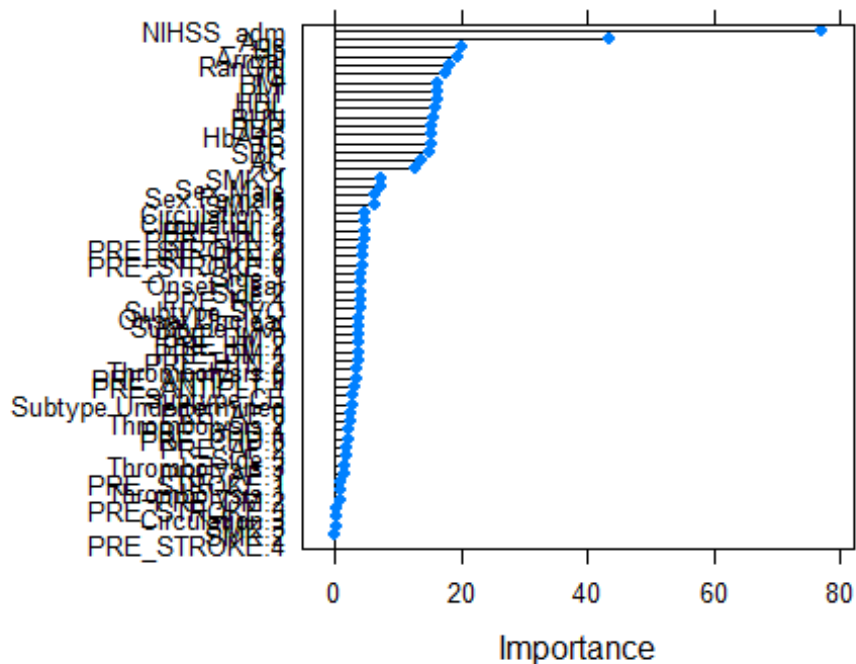

```
set.seed(seed)
rf_fit_smote2 <- train(class~., data = traindata.smote, method = "rf",
                        trControl=ctrl, metric=metric, tuneLength=10,
                        ntree=1000, verbose=FALSE)

rf_fit_smote2

## Random Forest
##
## 1001 samples
##    60 predictor
##    2 classes: 'unfavor', 'favor'
##
## No pre-processing
## Resampling: Cross-Validated (10 fold, repeated 10 times)
## Summary of sample sizes: 901, 902, 901, 901, 901, 900, ...
## Resampling results across tuning parameters:
##
##    mtry  ROC          Sens       Spec
##    2     0.9208632  0.7040981  0.9343326
##    8     0.9303975  0.8006753  0.8727952
##    14    0.9267842  0.8179371  0.8589937
##    21    0.9219385  0.8194496  0.8465059
##    27    0.9189355  0.8205042  0.8425856
##    34    0.9158507  0.8192507  0.8390391
##    40    0.9136014  0.8183673  0.8343920
##    47    0.9108900  0.8190102  0.8304857
```

```
##    53    0.9087927  0.8168501  0.8285989
##    60    0.9071169  0.8179140  0.8274983
##
## ROC was used to select the optimal model using the largest value.
## The final value used for the model was mtry = 8.
xsmote2 <- evalm(rf_fit_smote2)
```



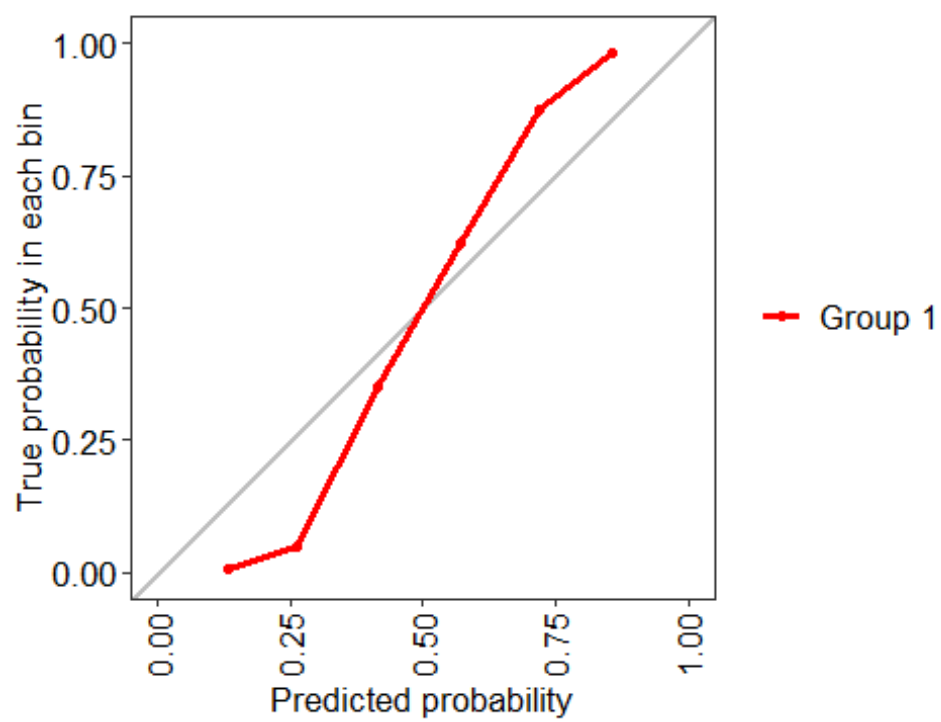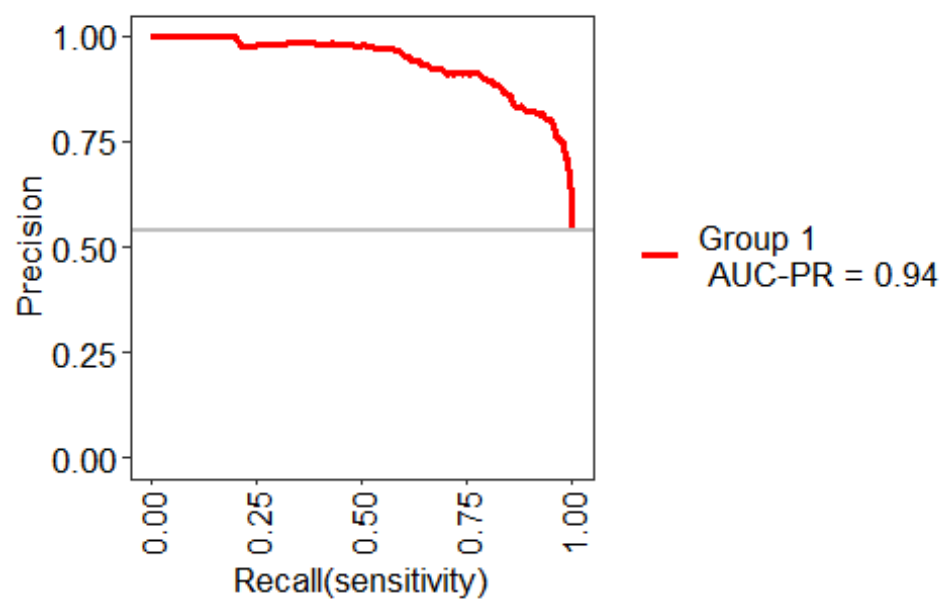

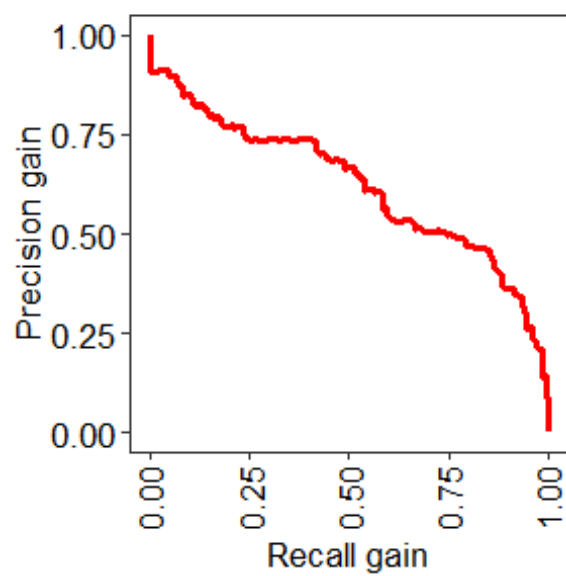

Group 1  
AUC-PRG = 0.62

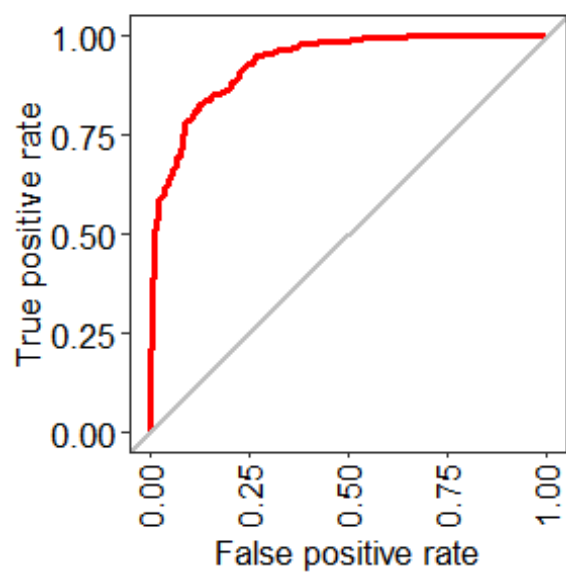

Group 1  
AUC-ROC = 0.93

xsmote2\$stdres

```

## `$`Group 1`
##          Score      CI
## SENS      0.873 0.84-0.9
## SPEC      0.797 0.76-0.83
## MCC        0.674    <NA>
## Informedness 0.671    <NA>
## PREC      0.833 0.8-0.86
## NPV        0.845 0.81-0.88
## FPR        0.203    <NA>
## F1         0.853    <NA>
## TP         469.000    <NA>
## FP         94.000    <NA>
## TN         370.000    <NA>
## FN         68.000    <NA>
## AUC-ROC     0.930 0.91-0.95
## AUC-PR      0.940    <NA>
## AUC-PRG     0.620    <NA>

test_pred_rfsmote2 <- predict(rf_fit_smote1, newdata = testdata)
confusionMatrix(test_pred_rfsmote2, testdata$Outcome)

## Confusion Matrix and Statistics
##
##          Reference
## Prediction favor unfavor
##   favor    183     43
##  unfavor     25     46
##
##          Accuracy : 0.771
##          95% CI : (0.719, 0.8176)
##   No Information Rate : 0.7003
##   P-Value [Acc > NIR] : 0.003986
##
##          Kappa : 0.421
##
##  Mcnemar's Test P-Value : 0.039250
##
##          Sensitivity : 0.8798
##          Specificity : 0.5169
##   Pos Pred Value : 0.8097
##   Neg Pred Value : 0.6479
##   Prevalence : 0.7003
##   Detection Rate : 0.6162
##   Detection Prevalence : 0.7609
##   Balanced Accuracy : 0.6983
##
##   'Positive' Class : favor
##

```

```
test_prob_smote2 <- predict(rf_fit_smote2, newdata = testdata, type="prob")
msmote2 = data.frame(test_prob_smote2, testdata$Outcome)
ysmote2<-evalm(msmote2)
```

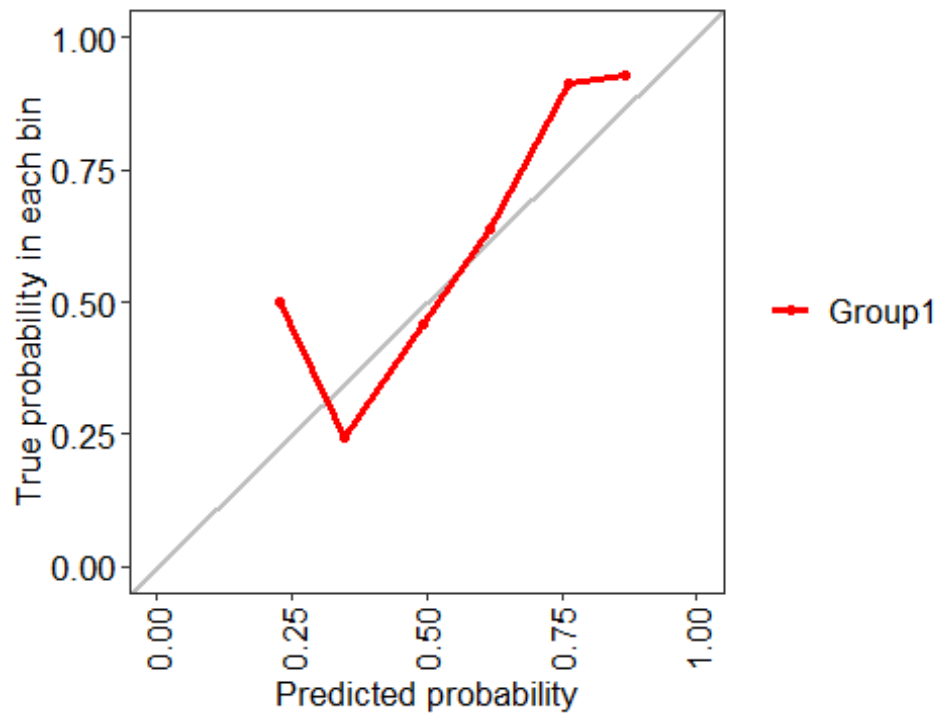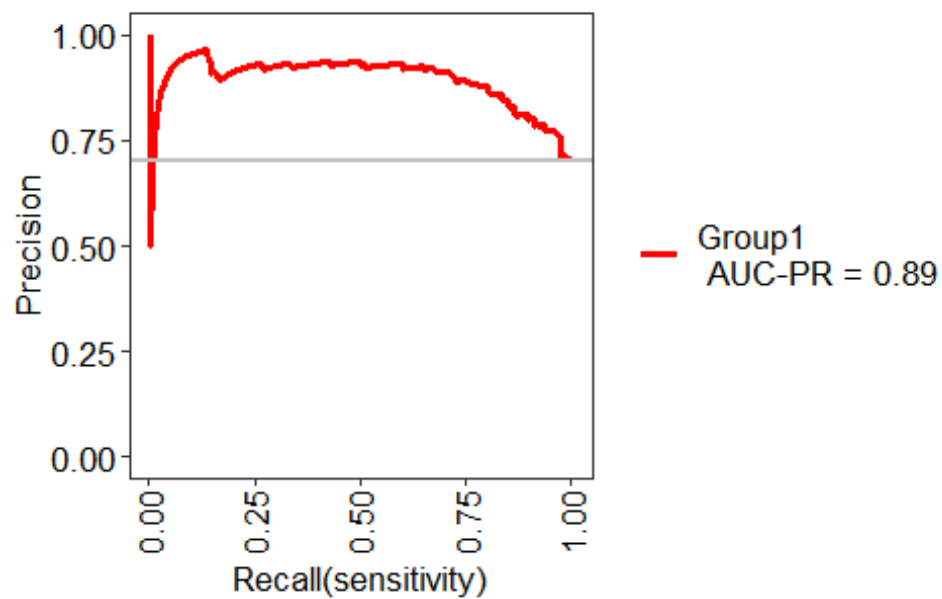

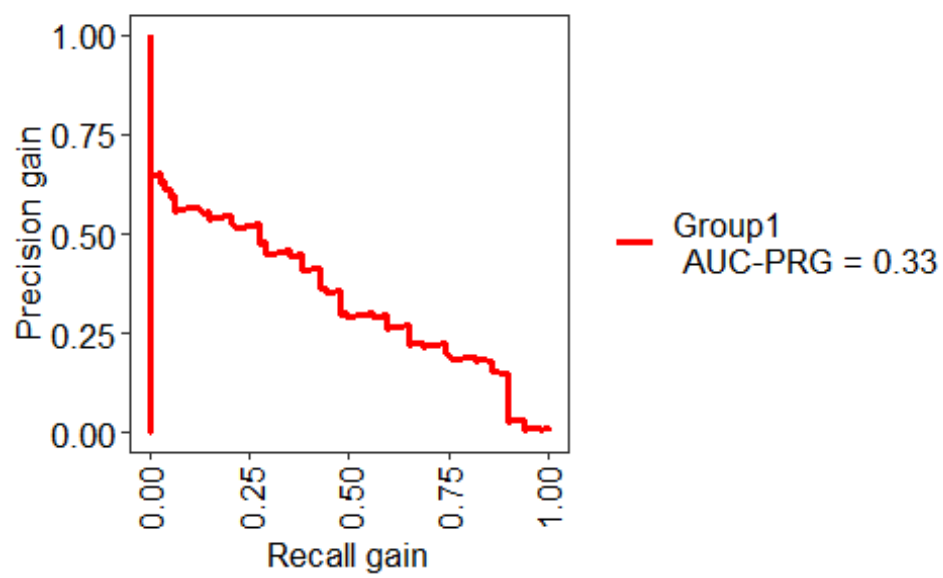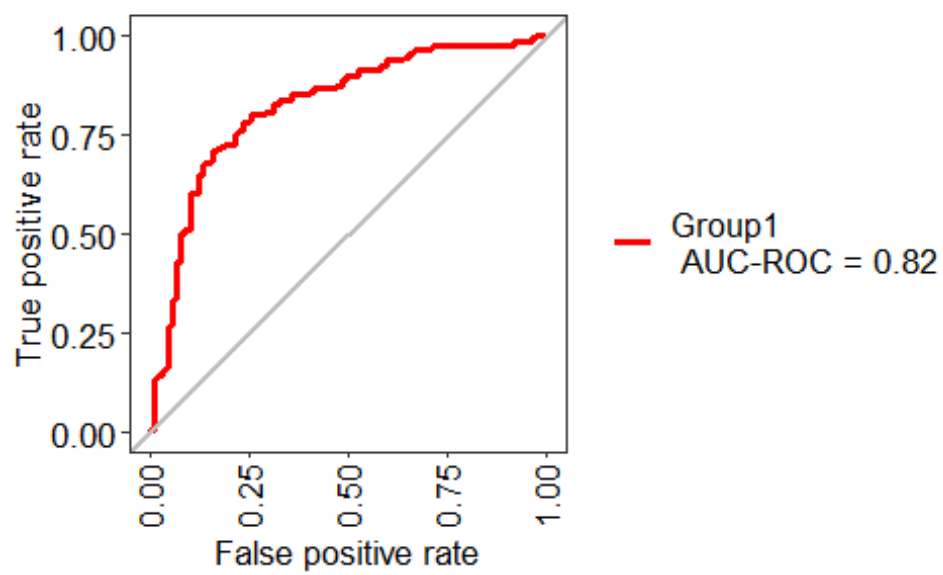

ysmote2\$stdres

```

## $Group1
##          Score      CI
## SENS      0.889 0.84-0.93
## SPEC      0.517 0.41-0.62
## MCC       0.441    <NA>
## Informedness 0.406    <NA>
## PREC      0.811 0.76-0.86
## NPV       0.667 0.55-0.77
## FPR       0.483    <NA>
## F1        0.849    <NA>
## TP        185.000    <NA>
## FP         43.000    <NA>
## TN         46.000    <NA>
## FN         23.000    <NA>
## AUC-ROC    0.820 0.77-0.87
## AUC-PR     0.890    <NA>
## AUC-PRG    0.330    <NA>

imp_smote2<-varImp(rf_fit_smote2, scale = FALSE)
imp_smote2

## rf variable importance
##
##   only 20 most important variables shown (out of 60)
##
##          Overall
## NIHSS_adm  75.783
## Age        43.039
## Hb         20.267
## Arrival    19.418
## RanGlu     18.378
## TG         18.065
## BMI        16.530
## PLT        16.351
## HDL        16.111
## DBP        15.613
## LDL        15.403
## BUN        15.326
## TC         15.267
## HbA1C      15.111
## SBP        14.939
## AC         13.899
## Cr         12.627
## SMK.1      7.401
## Sex.Male   7.320
## SMK.0      6.507

plot(imp_smote2)

```

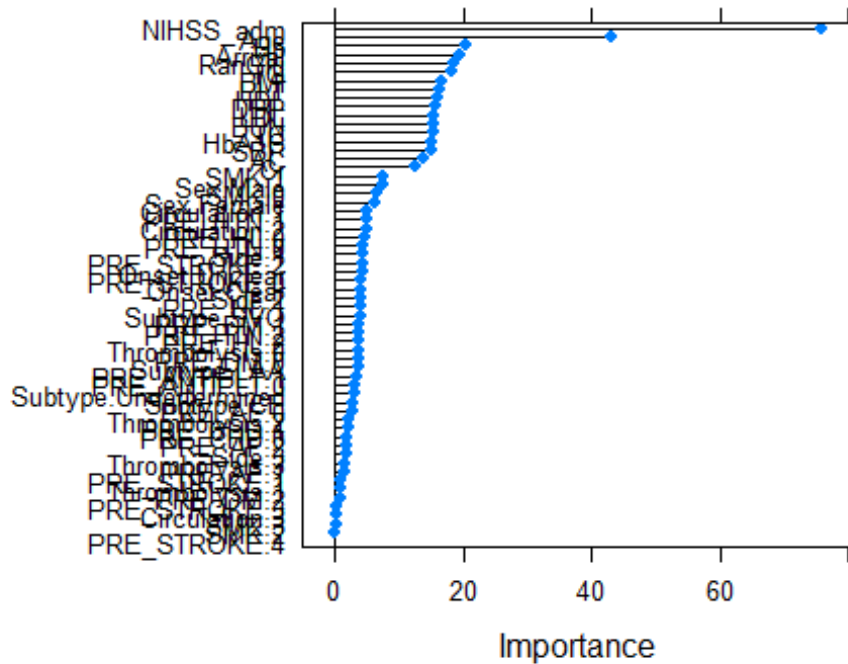

```
set.seed(seed)
rf_fit_smote3 <- train(class~., data = traindata.smote, method = "rf",
                        trControl=ctrl, metric=metric, tuneLength=10,
                        ntree=1500, verbose=FALSE)

rf_fit_smote3

## Random Forest
##
## 1001 samples
##    60 predictor
##    2 classes: 'unfavor', 'favor'
##
## No pre-processing
## Resampling: Cross-Validated (10 fold, repeated 10 times)
## Summary of sample sizes: 901, 902, 901, 901, 901, 900, ...
## Resampling results across tuning parameters:
##
##    mtry  ROC          Sens          Spec
##    2     0.9210526    0.7062627    0.9335989
##    8     0.9301061    0.7976827    0.8746576
##    14    0.9268312    0.8175208    0.8580713
##    21    0.9222498    0.8213830    0.8478022
##    27    0.9191924    0.8209482    0.8431377
##    34    0.9157090    0.8211795    0.8386723
##    40    0.9139460    0.8183719    0.8347624
##    47    0.9109090    0.8177290    0.8310342
```

```
## 53 0.9088071 0.8155735 0.8289797
## 60 0.9072184 0.8190102 0.8271209
##
## ROC was used to select the optimal model using the largest value.
## The final value used for the model was mtry = 8.
xsmote3 <- evalm(rf_fit_smote3)
```



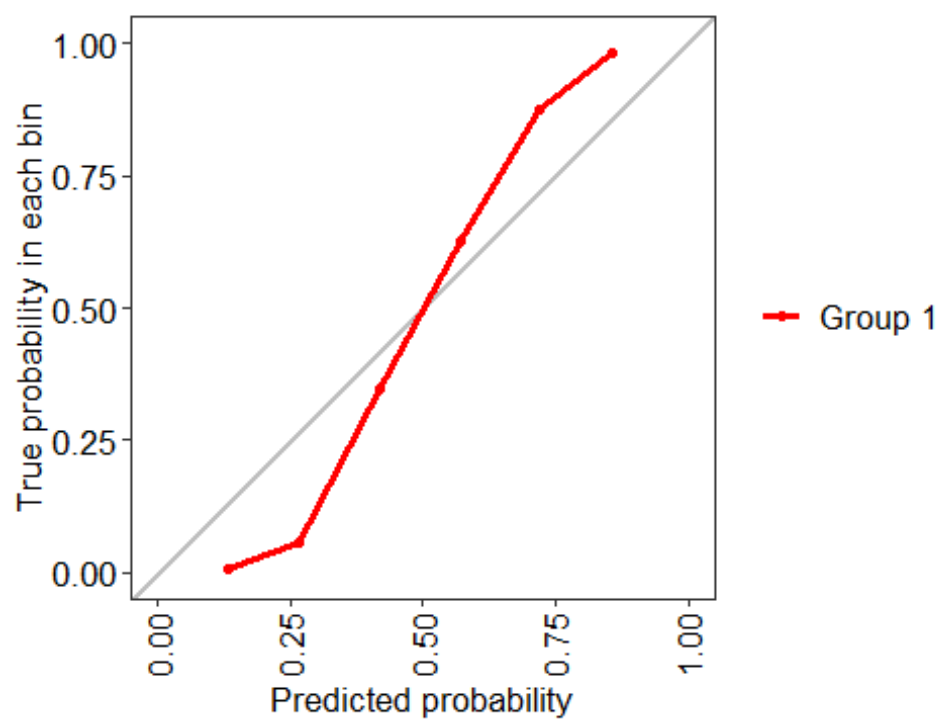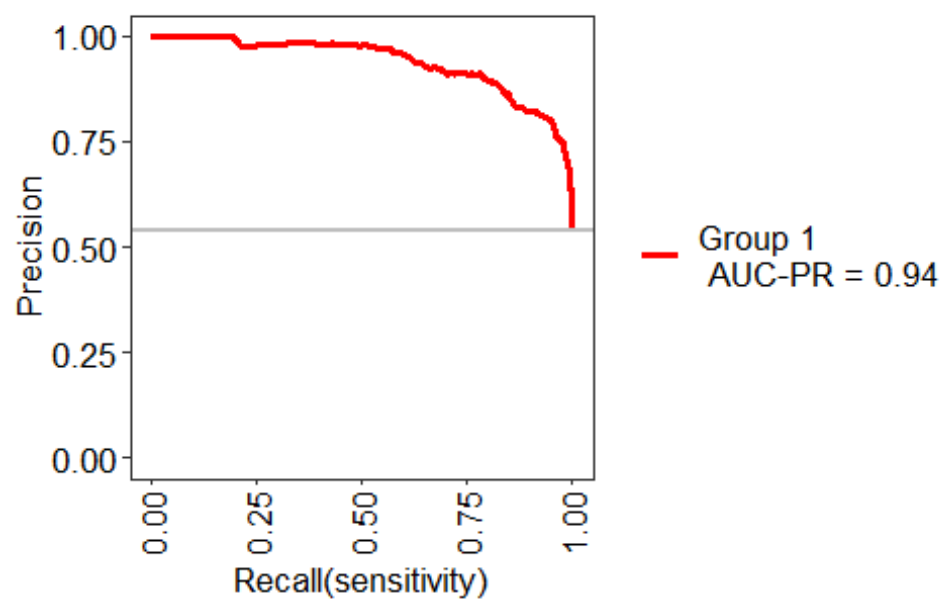

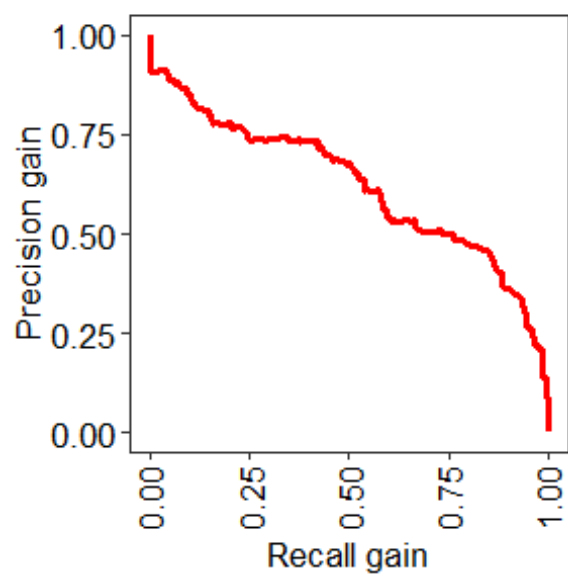

Group 1  
AUC-PRG = 0.62

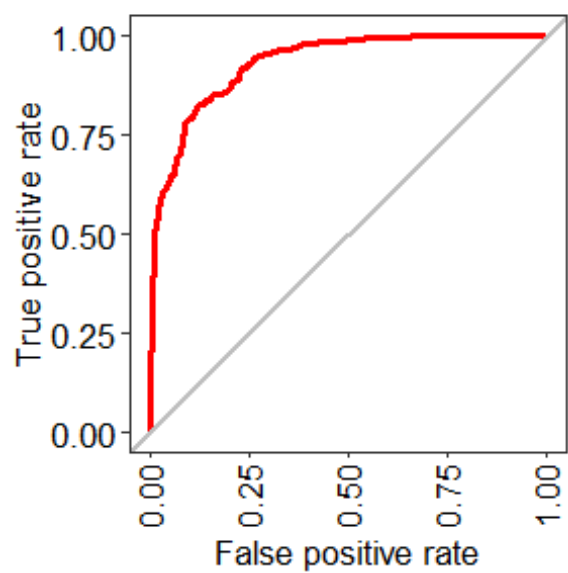

Group 1  
AUC-ROC = 0.93

xsmote3\$stdres

```

## `$`Group 1`
##           Score      CI
## SENS      0.873  0.84-0.9
## SPEC      0.797  0.76-0.83
## MCC       0.674    <NA>
## Informedness 0.671    <NA>
## PREC      0.833  0.8-0.86
## NPV       0.845  0.81-0.88
## FPR       0.203    <NA>
## F1        0.853    <NA>
## TP        469.000    <NA>
## FP        94.000    <NA>
## TN        370.000    <NA>
## FN        68.000    <NA>
## AUC-ROC    0.930  0.91-0.95
## AUC-PR     0.940    <NA>
## AUC-PRG    0.620    <NA>

test_pred_rfsmote3 <- predict(rf_fit_smote3, newdata = testdata)
confusionMatrix(test_pred_rfsmote3, testdata$Outcome)

## Confusion Matrix and Statistics
##
##           Reference
## Prediction favor unfavor
##   favor      185      44
##   unfavor     23      45
##
##           Accuracy : 0.7744
##           95% CI : (0.7226, 0.8207)
##   No Information Rate : 0.7003
##   P-Value [Acc > NIR] : 0.00266
##
##           Kappa : 0.4236
##
##  Mcnemar's Test P-Value : 0.01455
##
##           Sensitivity : 0.8894
##           Specificity : 0.5056
##           Pos Pred Value : 0.8079
##           Neg Pred Value : 0.6618
##           Prevalence : 0.7003
##           Detection Rate : 0.6229
##           Detection Prevalence : 0.7710
##           Balanced Accuracy : 0.6975
##
##           'Positive' Class : favor
##

```

```
test_prob_smote3 <- predict(rf_fit_smote3, newdata = testdata, type="prob")
msmote3 = data.frame(test_prob_smote3, testdata$Outcome)
ysmote3<-evalm(msmote3)
```

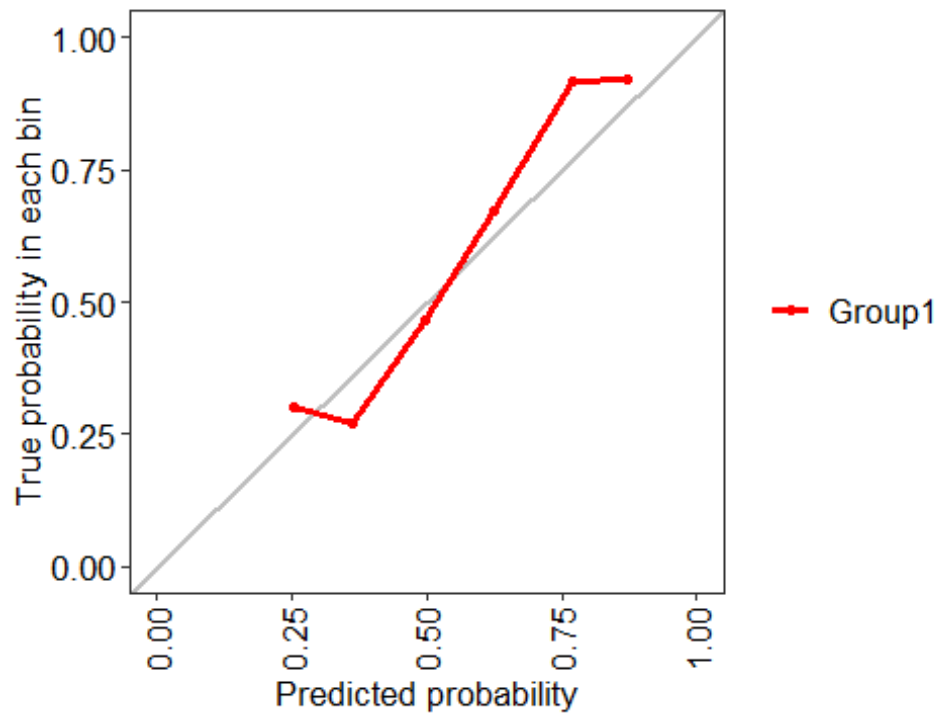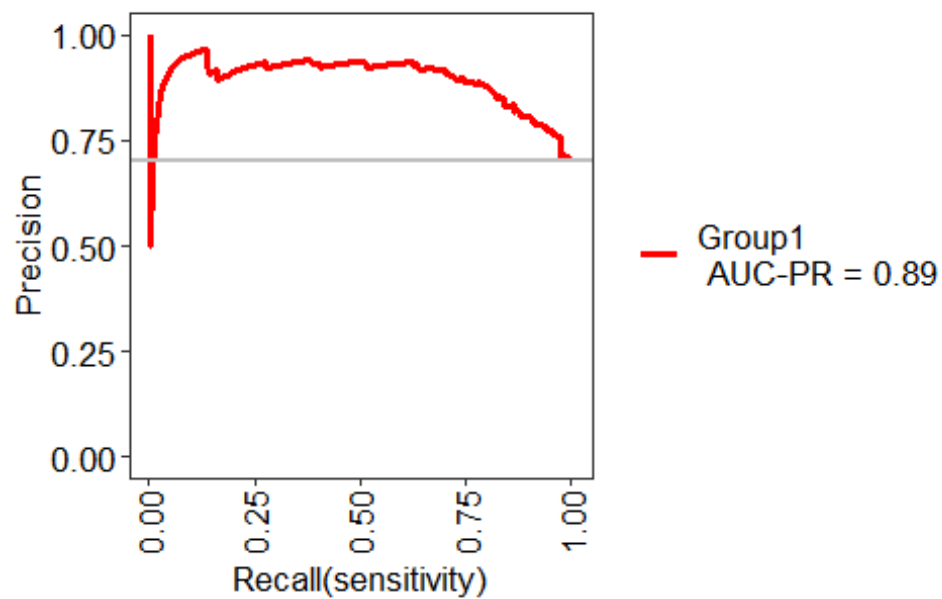

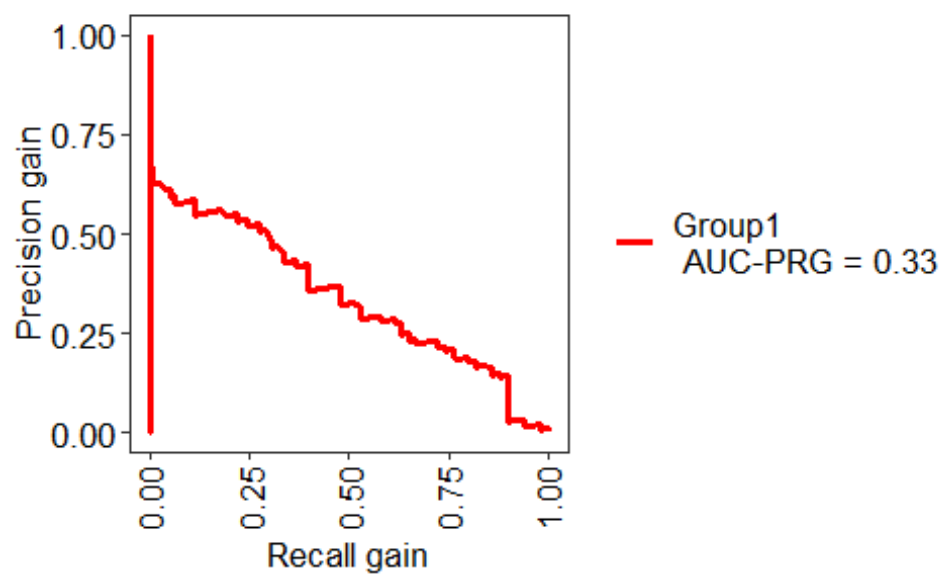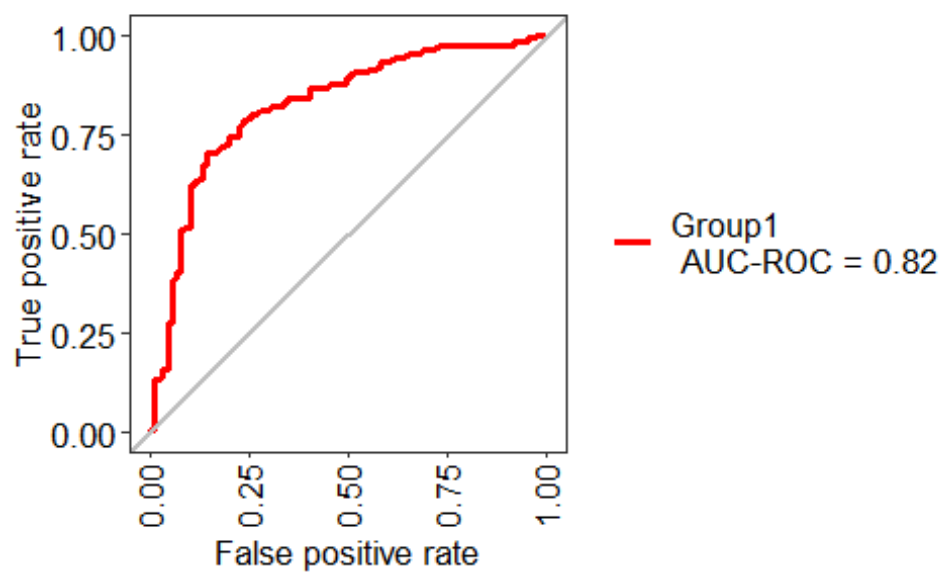

```

## $Group1
##           Score      CI
## SENS      0.889 0.84-0.93
## SPEC      0.506 0.4-0.61
## MCC       0.431    <NA>
## Informedness 0.395    <NA>
## PREC      0.808 0.75-0.85
## NPV       0.662 0.54-0.76
## FPR       0.494    <NA>
## F1        0.847    <NA>
## TP        185.000    <NA>
## FP        44.000    <NA>
## TN        45.000    <NA>
## FN        23.000    <NA>
## AUC-ROC    0.820 0.77-0.87
## AUC-PR     0.890    <NA>
## AUC-PRG    0.330    <NA>

imp_smote3<-varImp(rf_fit_smote3, scale = FALSE)
imp_smote3

## rf variable importance
##
##   only 20 most important variables shown (out of 60)
##
##           Overall
## NIHSS_adm  75.137
## Age        42.740
## Hb         20.335
## Arrival    19.585
## RanGlu     18.298
## TG         18.296
## BMI        16.412
## PLT        16.406
## HDL        16.173
## DBP        15.633
## BUN        15.510
## LDL        15.370
## TC         15.251
## HbA1C      15.212
## SBP        14.997
## AC         13.836
## Cr         12.563
## SMK.1      7.375
## Sex.Male   7.140
## SMK.0      6.885

plot(imp_smote3)

```

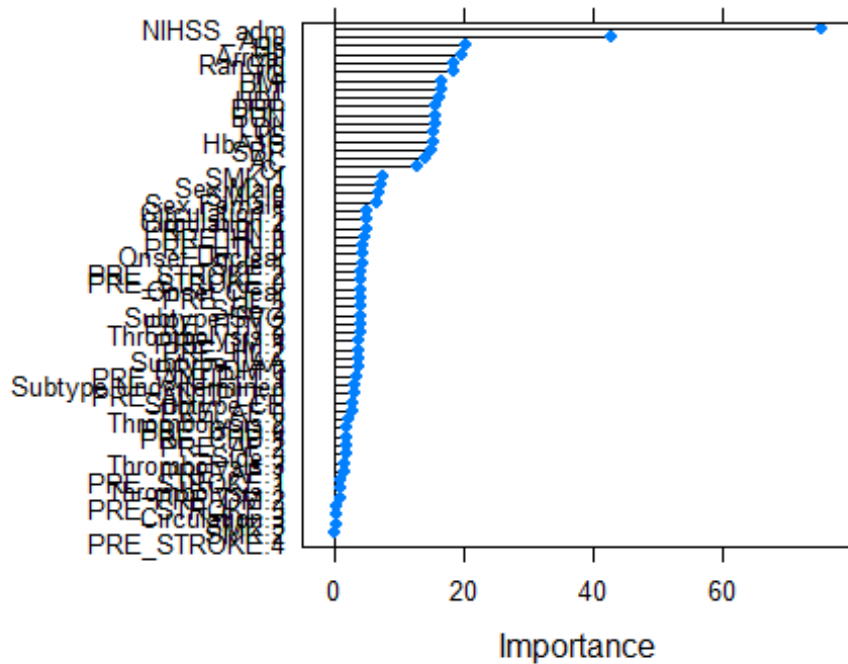

```
set.seed(seed)
xgb_fit_smote <- train(class~., data = traindata.smote, method = "xgbTree",
                        trControl=ctrl, metric=metric, tuneGrid=xgbgrid)
xgb_fit_smote

## eXtreme Gradient Boosting
##
## 1001 samples
##    60 predictor
##    2 classes: 'unfavor', 'favor'
##
## No pre-processing
## Resampling: Cross-Validated (10 fold, repeated 10 times)
## Summary of sample sizes: 901, 902, 901, 901, 901, 900, ...
## Resampling results across tuning parameters:
##
##  eta    max_depth  nrounds  ROC          Sens         Spec
##  0.01    6          500      0.9190590  0.8091119  0.8534556
##  0.01    6          1000     0.9238319  0.8168501  0.8547310
##  0.01    6          1500     0.9247173  0.8224746  0.8530643
##  0.01    8          500      0.9223459  0.8125393  0.8539902
##  0.01    8          1000     0.9257357  0.8190287  0.8573690
##  0.01    8          1500     0.9259316  0.8237835  0.8556848
##  0.10    6          500      0.9202683  0.8213691  0.8485779
##  0.10    6          1000     0.9183886  0.8181730  0.8469287
##  0.10    6          1500     0.9173454  0.8160222  0.8486059
```

```

##    0.10  8          500      0.9220397  0.8235430  0.8566212
##    0.10  8          1000     0.9205760  0.8213784  0.8529071
##    0.10  8          1500     0.9192803  0.8203053  0.8531132
##
## Tuning parameter 'gamma' was held constant at a value of 0
## Tuning
##
## Tuning parameter 'min_child_weight' was held constant at a value of 1
##
## Tuning parameter 'subsample' was held constant at a value of 0.8
## ROC was used to select the optimal model using the largest value.
## The final values used for the model were nrounds = 1500, max_depth = 8, et
a
## = 0.01, gamma = 0, colsample_bytree = 0.6, min_child_weight = 1 and
## subsample = 0.8.
x_xgbsmote <- evalm(xgb_fit_smote)

```



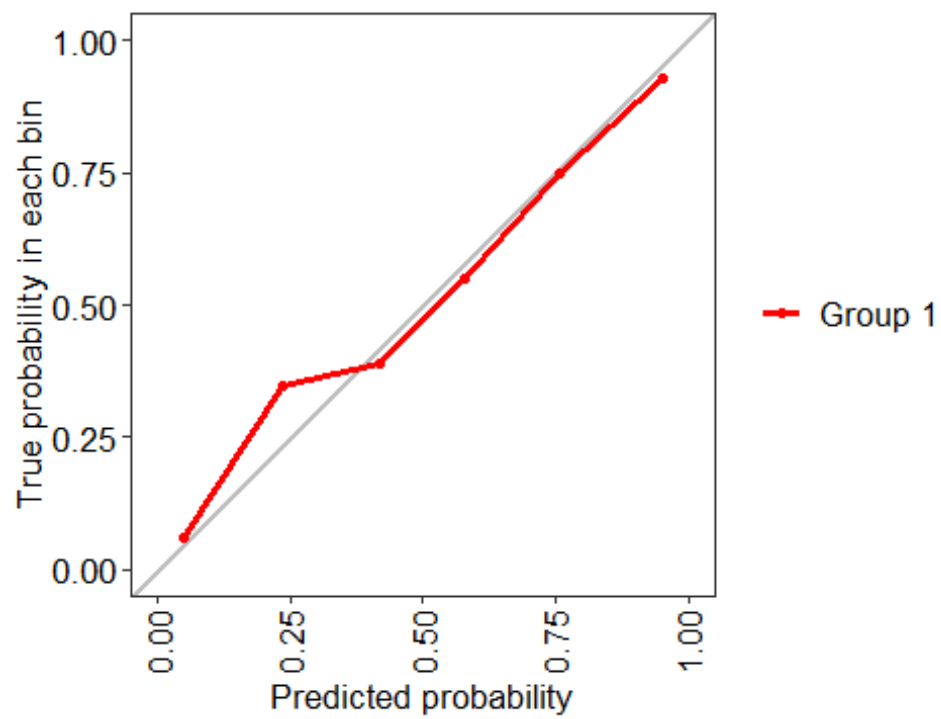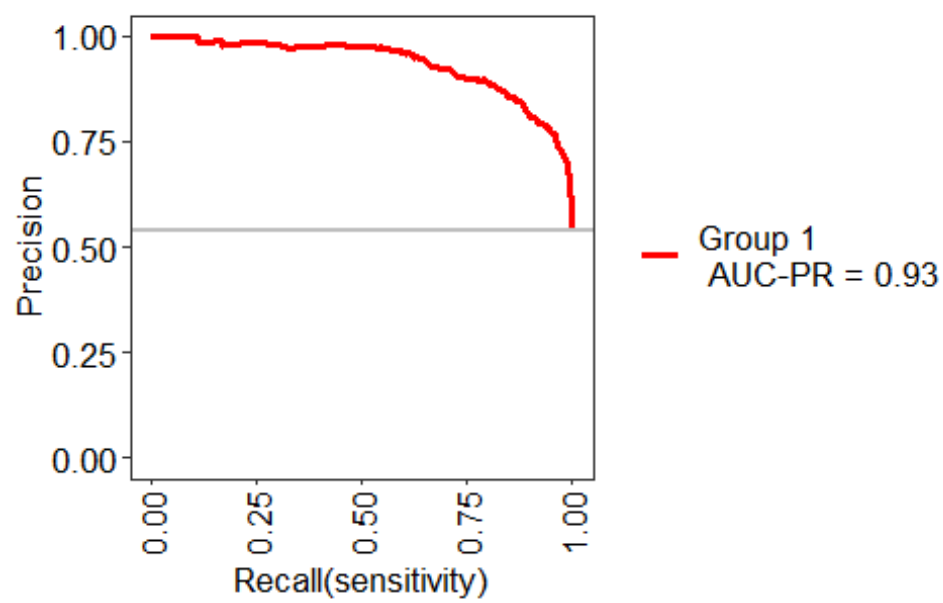

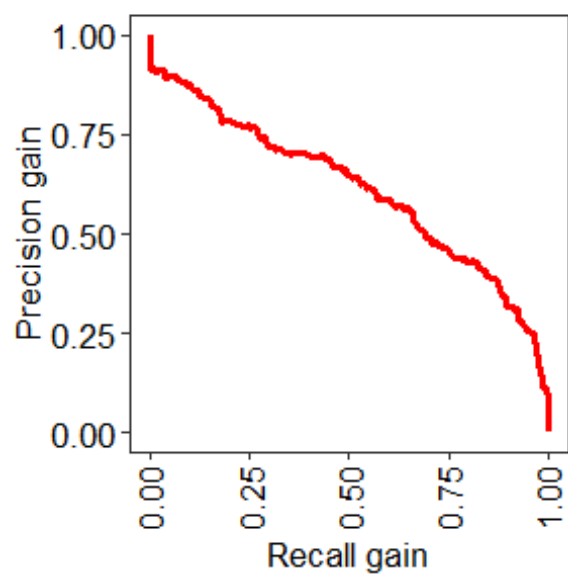

Group 1  
AUC-PRG = 0.61

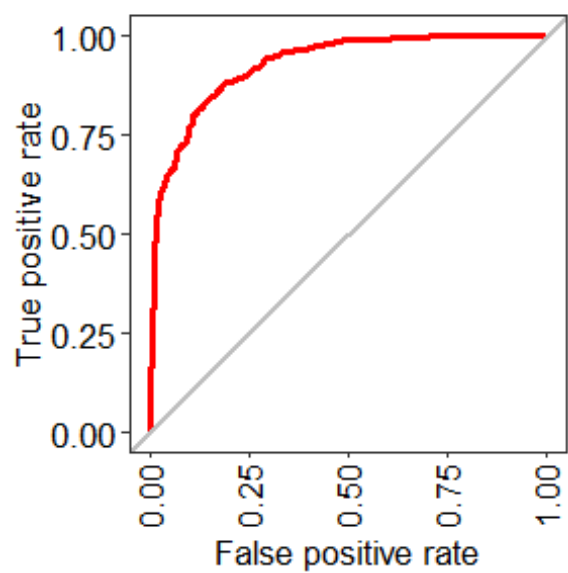

Group 1  
AUC-ROC = 0.93

```
x_xgbsmote$stdres
```

```

## `$`Group 1`
##           Score      CI
## SENS      0.862 0.83-0.89
## SPEC      0.830 0.79-0.86
## MCC       0.692    <NA>
## Informedness 0.692    <NA>
## PREC      0.854 0.82-0.88
## NPV       0.839 0.8-0.87
## FPR       0.170    <NA>
## F1        0.858    <NA>
## TP        463.000    <NA>
## FP        79.000    <NA>
## TN        385.000    <NA>
## FN        74.000    <NA>
## AUC-ROC    0.930 0.91-0.95
## AUC-PR     0.930    <NA>
## AUC-PRG    0.610    <NA>

test_pred_xgbsmote <- predict(xgb_fit_smote, newdata = testdata)
confusionMatrix(test_pred_xgbsmote, testdata$Outcome)

## Confusion Matrix and Statistics
##
##           Reference
## Prediction favor unfavor
##   favor      180      36
##   unfavor     28      53
##
##           Accuracy : 0.7845
##           95% CI : (0.7333, 0.8299)
##   No Information Rate : 0.7003
##   P-Value [Acc > NIR] : 0.0007089
##
##           Kappa : 0.4731
##
##  Mcnemar's Test P-Value : 0.3815739
##
##           Sensitivity : 0.8654
##           Specificity : 0.5955
##           Pos Pred Value : 0.8333
##           Neg Pred Value : 0.6543
##           Prevalence : 0.7003
##           Detection Rate : 0.6061
##           Detection Prevalence : 0.7273
##           Balanced Accuracy : 0.7304
##
##           'Positive' Class : favor
##

```

```
test_prob_xgbsmote <- predict(xgb_fit_smote, newdata = testdata, type="prob")
mxgbsmote = data.frame(test_prob_xgbsmote, testdata$Outcome)
yxgbsmote<-evalm(mxgbsmote)
```

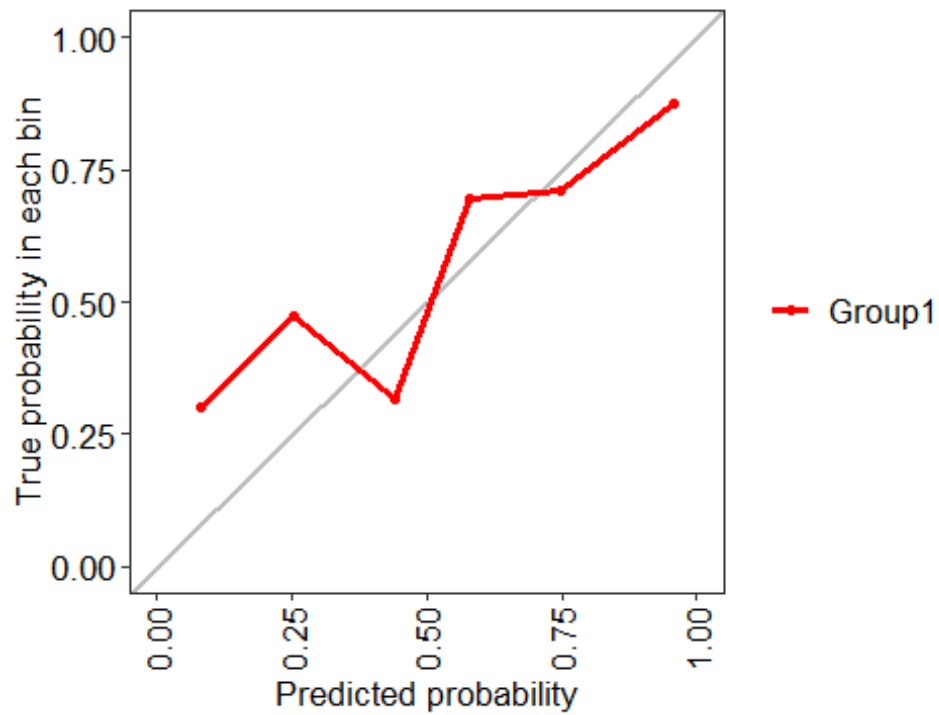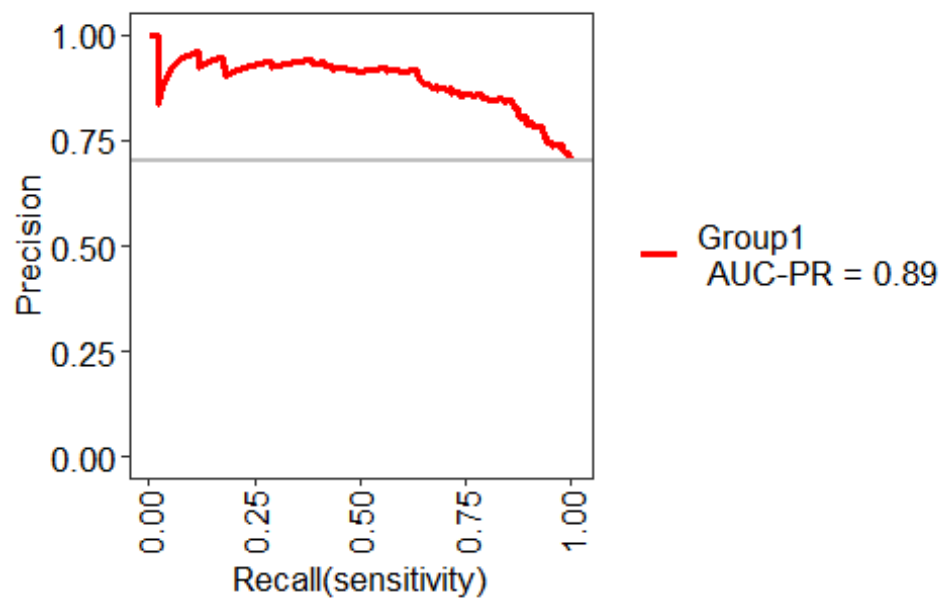

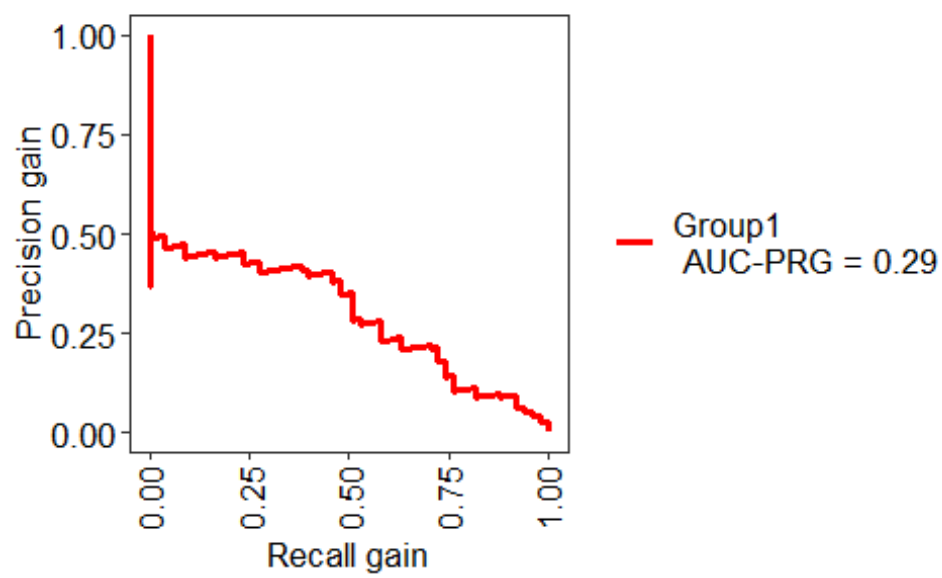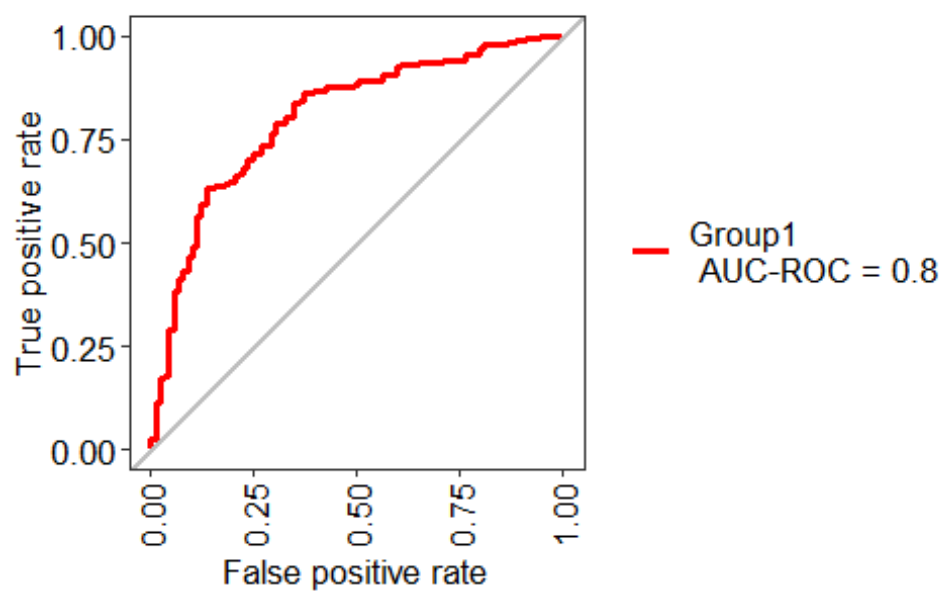

`yxgbsmote$stdres`

```

## $Group1
##           Score      CI
## SENS      0.865 0.81-0.91
## SPEC      0.596 0.49-0.69
## MCC       0.474      <NA>
## Informedness 0.461      <NA>
## PREC      0.833 0.78-0.88
## NPV       0.654 0.55-0.75
## FPR       0.404      <NA>
## F1        0.849      <NA>
## TP        180.000      <NA>
## FP        36.000      <NA>
## TN        53.000      <NA>
## FN        28.000      <NA>
## AUC-ROC    0.800 0.75-0.85
## AUC-PR     0.890      <NA>
## AUC-PRG    0.290      <NA>

imp_smote<-varImp(xgb_fit_smote, scale = FALSE)
imp_smote

## xgbTree variable importance
##
##   only 20 most important variables shown (out of 60)
##
##           Overall
## NIHSS_adm  0.17418
## Age        0.10367
## RanGlu     0.04473
## Arrival    0.04389
## PLT        0.04131
## Hb         0.03973
## DBP        0.03770
## BMI        0.03705
## LDL        0.03407
## HDL        0.03375
## TG         0.03353
## SBP        0.03286
## BUN        0.03195
## HbA1C      0.02922
## TC         0.02833
## Cr         0.02589
## AC         0.02185
## Sex.Female 0.01341
## SMK.0      0.01333
## PRE_STROKE.2 0.01109

plot(imp_smote)

```

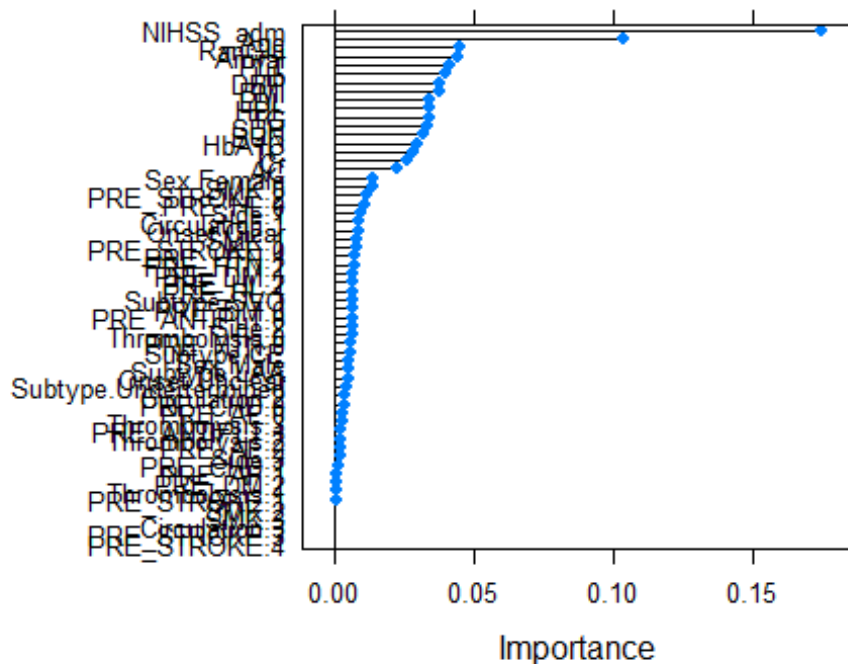

```
set.seed(seed)
svm_fit_smote <- train(class~., data = traindata.smote, method = "svmRadial",
                        trControl=ctrl, metric=metric, tuneLength = 10)
svm_fit_smote

## Support Vector Machines with Radial Basis Function Kernel
##
## 1001 samples
## 60 predictor
## 2 classes: 'unfavor', 'favor'
##
## No pre-processing
## Resampling: Cross-Validated (10 fold, repeated 10 times)
## Summary of sample sizes: 901, 902, 901, 901, 901, 900, ...
## Resampling results across tuning parameters:
##
##  C          ROC          Sens          Spec
##  0.25 0.8185238 0.6787188 0.7965269
##  0.50 0.8424136 0.7073913 0.8099126
##  1.00 0.8660391 0.7595236 0.8175227
##  2.00 0.8865991 0.7967761 0.8236827
##  4.00 0.9026900 0.8243987 0.8307372
##  8.00 0.9177071 0.8543617 0.8457862
## 16.00 0.9242558 0.8782424 0.8485639
## 32.00 0.9237056 0.8803932 0.8450175
```

```
##      64.00  0.9235749  0.8793293  0.8442732
##     128.00  0.9235749  0.8788853  0.8453913
##
## Tuning parameter 'sigma' was held constant at a value of 0.03214894
## ROC was used to select the optimal model using the largest value.
## The final values used for the model were sigma = 0.03214894 and C = 16.
x_svmsmote <- evalm(svm_fit_smote)
```



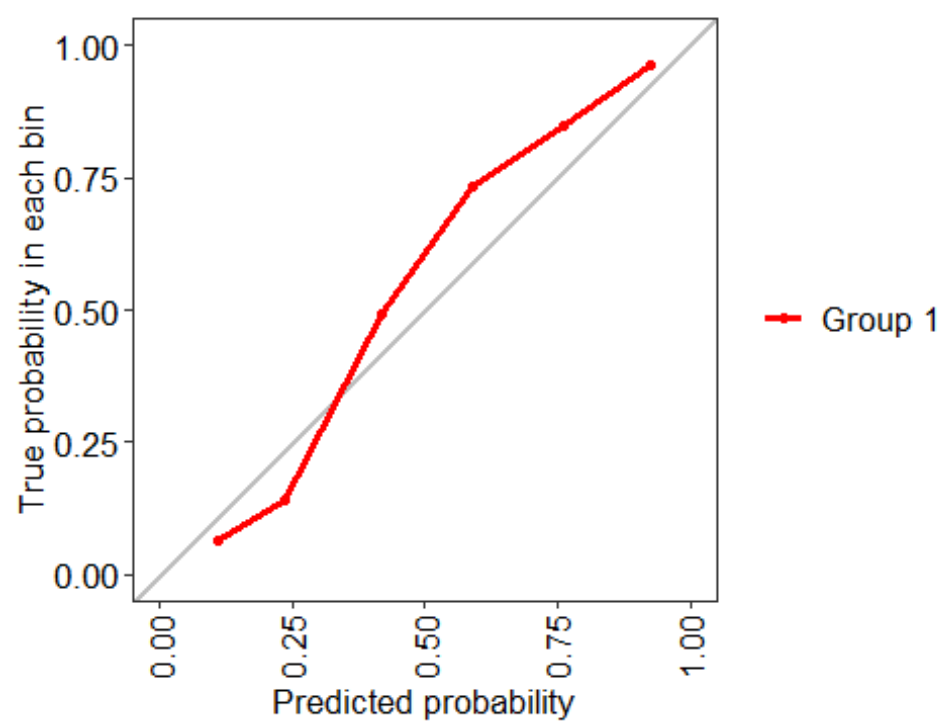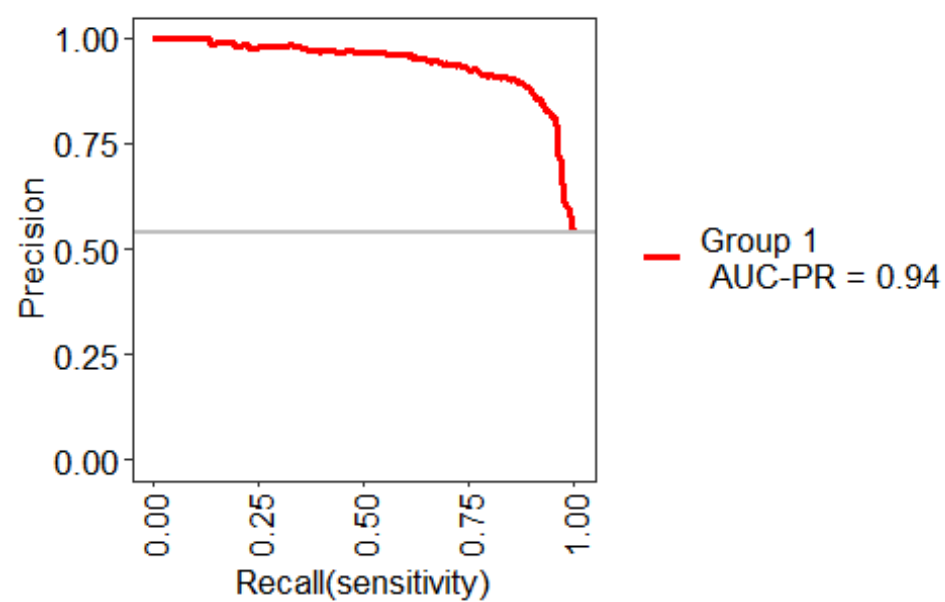

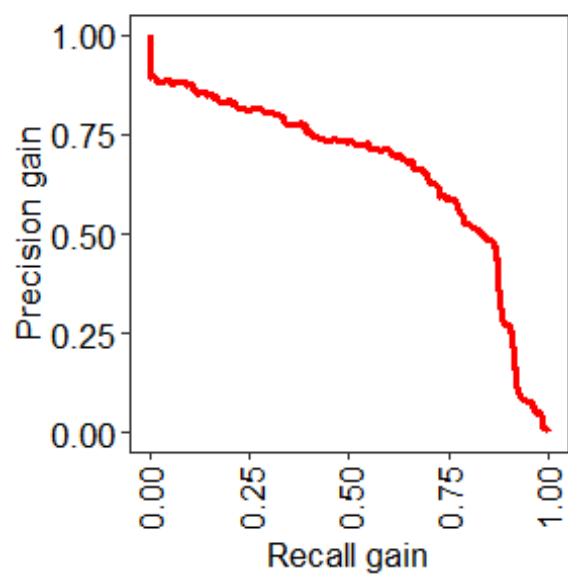

Group 1  
AUC-PRG = 0.66

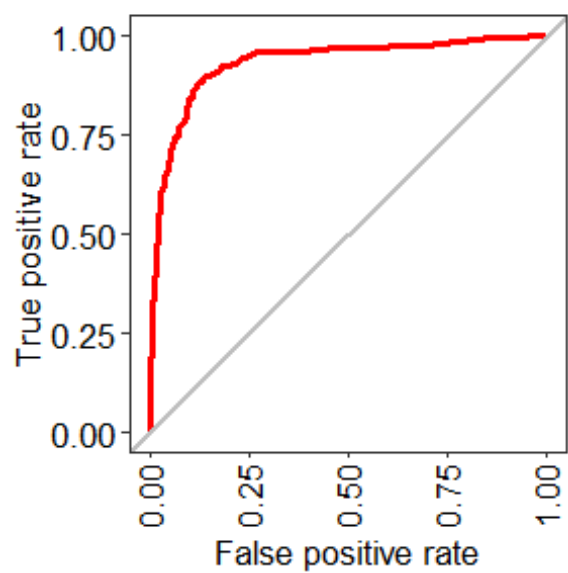

Group 1  
AUC-ROC = 0.93

```
x_svmsmote$stdres
```

```

## `$`Group 1`
##           Score      CI
## SENS      0.851 0.82-0.88
## SPEC      0.892 0.86-0.92
## MCC       0.741      <NA>
## Informedness 0.743      <NA>
## PREC      0.901 0.87-0.92
## NPV       0.838 0.8-0.87
## FPR       0.108      <NA>
## F1        0.875      <NA>
## TP        457.000      <NA>
## FP        50.000      <NA>
## TN        414.000      <NA>
## FN        80.000      <NA>
## AUC-ROC    0.930 0.91-0.95
## AUC-PR     0.940      <NA>
## AUC-PRG    0.660      <NA>

test_pred_svmsmote <- predict(svm_fit_smote, newdata = testdata)
confusionMatrix (test_pred_svmsmote, testdata$Outcome)

## Confusion Matrix and Statistics
##
##           Reference
## Prediction favor unfavor
##   favor      176      55
##   unfavor     32      34
##
##           Accuracy : 0.7071
##           95% CI : (0.6517, 0.7582)
##   No Information Rate : 0.7003
##   P-Value [Acc > NIR] : 0.42788
##
##           Kappa : 0.2464
##
##  Mcnemar's Test P-Value : 0.01834
##
##           Sensitivity : 0.8462
##           Specificity : 0.3820
##   Pos Pred Value : 0.7619
##   Neg Pred Value : 0.5152
##   Prevalence : 0.7003
##   Detection Rate : 0.5926
##   Detection Prevalence : 0.7778
##   Balanced Accuracy : 0.6141
##
##   'Positive' Class : favor
##

```

```
test_prob_svsmote <- predict(svm_fit_smote, newdata = testdata, type="prob")
msvsmote = data.frame(test_prob_svsmote, testdata$Outcome)
ysvsmote<-evalm(msvsmote)
```

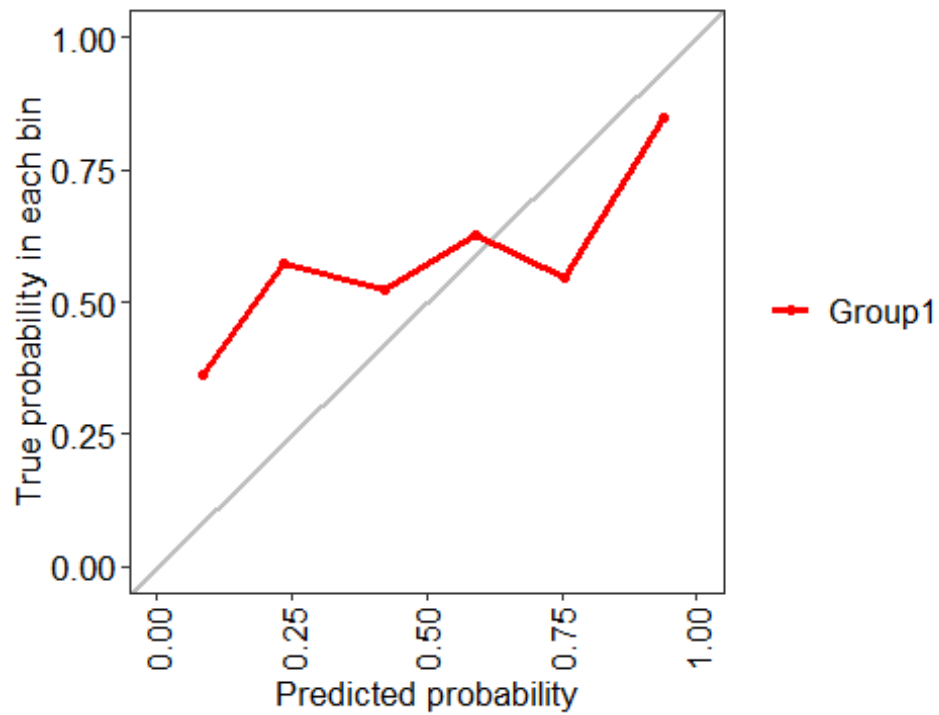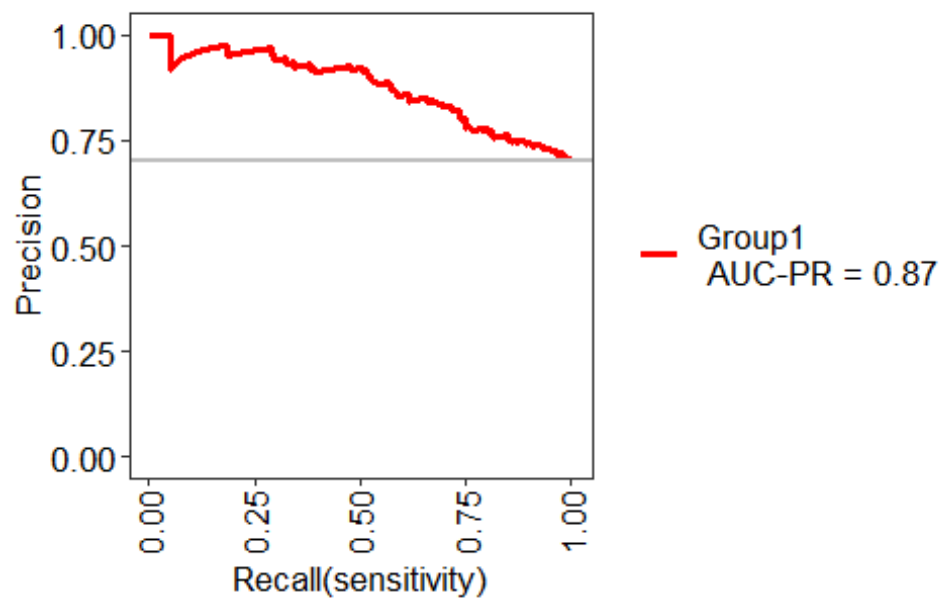

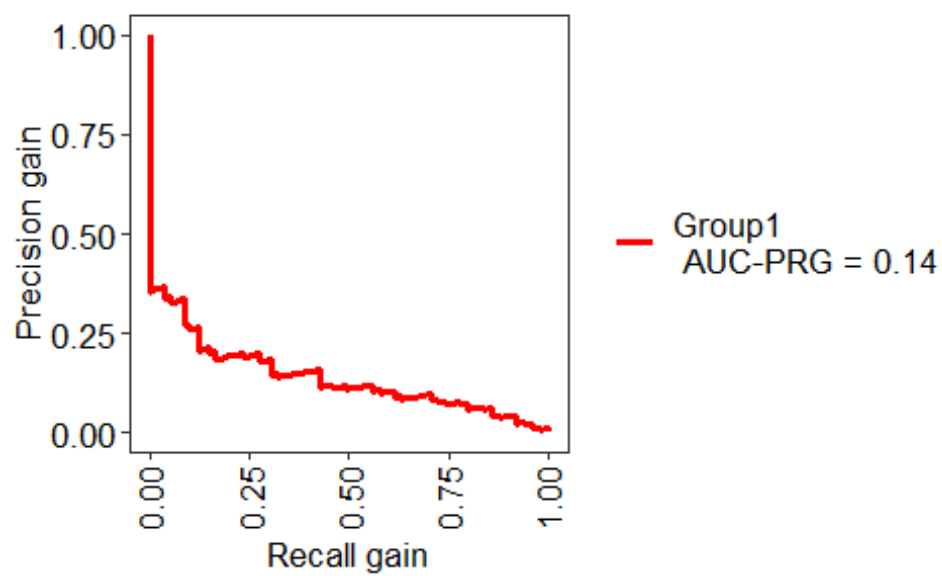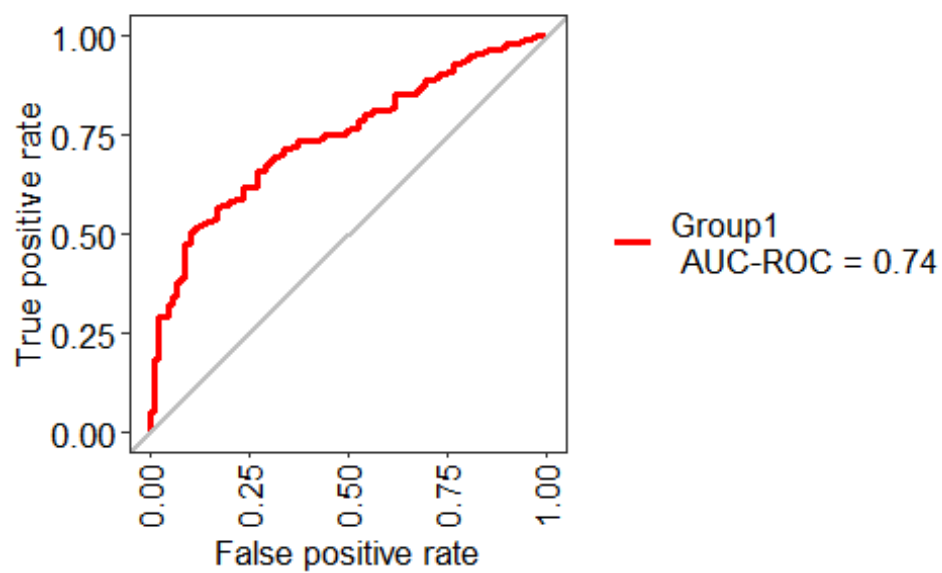

ysvmsmote\$stdres

```

## $Group1
##           Score      CI
## SENS      0.846 0.79-0.89
## SPEC      0.382 0.29-0.49
## MCC       0.251      <NA>
## Informedness 0.228      <NA>
## PREC      0.762 0.7-0.81
## NPV       0.515 0.4-0.63
## FPR       0.618      <NA>
## F1        0.802      <NA>
## TP        176.000      <NA>
## FP        55.000      <NA>
## TN        34.000      <NA>
## FN        32.000      <NA>
## AUC-ROC    0.740 0.68-0.8
## AUC-PR     0.870      <NA>
## AUC-PRG    0.140      <NA>

set.seed(seed)
knn_fit_smote <- train(class~., data = traindata.smote, method = "knn",
                      trControl=ctrl, metric=metric, tuneLength = 50)
knn_fit_smote

## k-Nearest Neighbors
##
## 1001 samples
##   60 predictor
##   2 classes: 'unfavor', 'favor'
##
## No pre-processing
## Resampling: Cross-Validated (10 fold, repeated 10 times)
## Summary of sample sizes: 901, 902, 901, 901, 901, 900, ...
## Resampling results across tuning parameters:
##
##   k   ROC      Sens      Spec
##   5  0.7891124 0.8774607 0.5530713
##   7  0.7718016 0.8621832 0.5428546
##   9  0.7724889 0.8442183 0.5392488
##  11  0.7670486 0.8276087 0.5433508
##  13  0.7621251 0.8276226 0.5355486
##  15  0.7605204 0.8295282 0.5295982
##  17  0.7574139 0.8157308 0.5320056
##  19  0.7579700 0.8081684 0.5351468
##  21  0.7592525 0.8077521 0.5370266
##  23  0.7582354 0.8042923 0.5396191
##  25  0.7597226 0.8086309 0.5312823
##  27  0.7586580 0.8058187 0.5303529
##  29  0.7566641 0.7995606 0.5295528
##  31  0.7549773 0.7956707 0.5351677

```

```
## 33 0.7551995 0.7989269 0.5330992
## 35 0.7548698 0.7972248 0.5355486
## 37 0.7536818 0.7991397 0.5355241
## 39 0.7517316 0.7987373 0.5332879
## 41 0.7505306 0.7946438 0.5301118
## 43 0.7491852 0.7892553 0.5342453
## 45 0.7502842 0.7890333 0.5357372
## 47 0.7501962 0.7912165 0.5349965
## 49 0.7501505 0.7922664 0.5355416
## 51 0.7495641 0.7952868 0.5336827
## 53 0.7495018 0.7937558 0.5331202
## 55 0.7480027 0.7924699 0.5366562
## 57 0.7472201 0.7888205 0.5349860
## 59 0.7463208 0.7871045 0.5374319
## 61 0.7458379 0.7845051 0.5374528
## 63 0.7466711 0.7814847 0.5383857
## 65 0.7465251 0.7780250 0.5391335
## 67 0.7463538 0.7799722 0.5376625
## 69 0.7453873 0.7765541 0.5423061
## 71 0.7446172 0.7745930 0.5437945
## 73 0.7449039 0.7741906 0.5454507
## 75 0.7433888 0.7731082 0.5359888
## 77 0.7428019 0.7705227 0.5415828
## 79 0.7419135 0.7683765 0.5408386
## 81 0.7404245 0.7655550 0.5456709
## 83 0.7390456 0.7649075 0.5477149
## 85 0.7388668 0.7627567 0.5475542
## 87 0.7387461 0.7620907 0.5501398
## 89 0.7396144 0.7631776 0.5531516
## 91 0.7399839 0.7607956 0.5557512
## 93 0.7404950 0.7569149 0.5585465
## 95 0.7401592 0.7532331 0.5596576
## 97 0.7403218 0.7545375 0.5628302
## 99 0.7406606 0.7549722 0.5642837
## 101 0.7409364 0.7543293 0.5646471
## 103 0.7411981 0.7543386 0.5683892
```

```
##
```

```
## ROC was used to select the optimal model using the largest value.
```

```
## The final value used for the model was k = 5.
```

```
x_knnsmote <- evalm(knn_fit_smote)
```

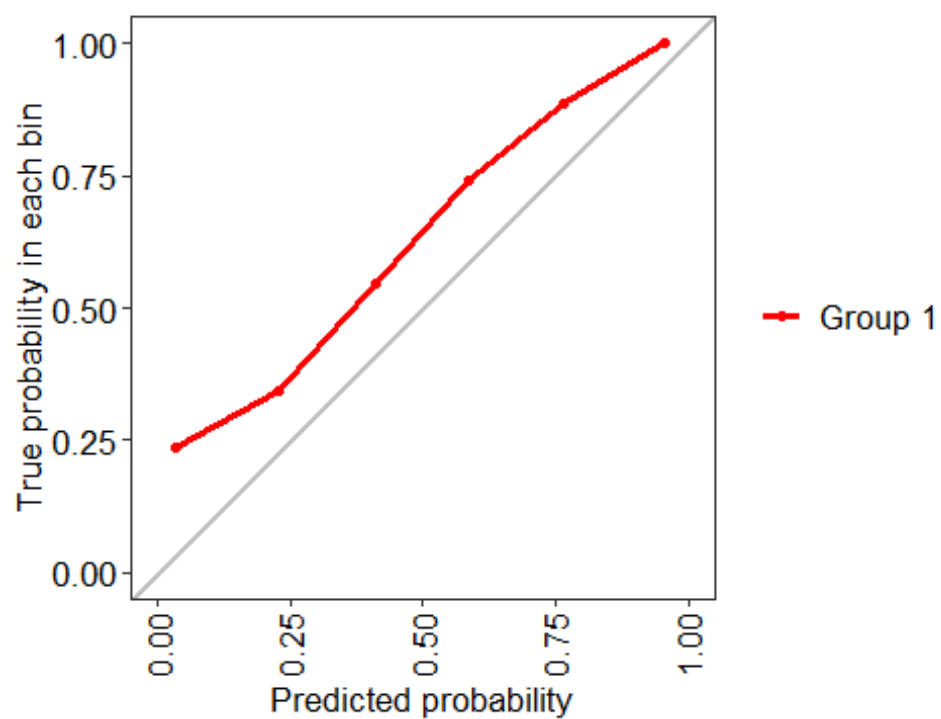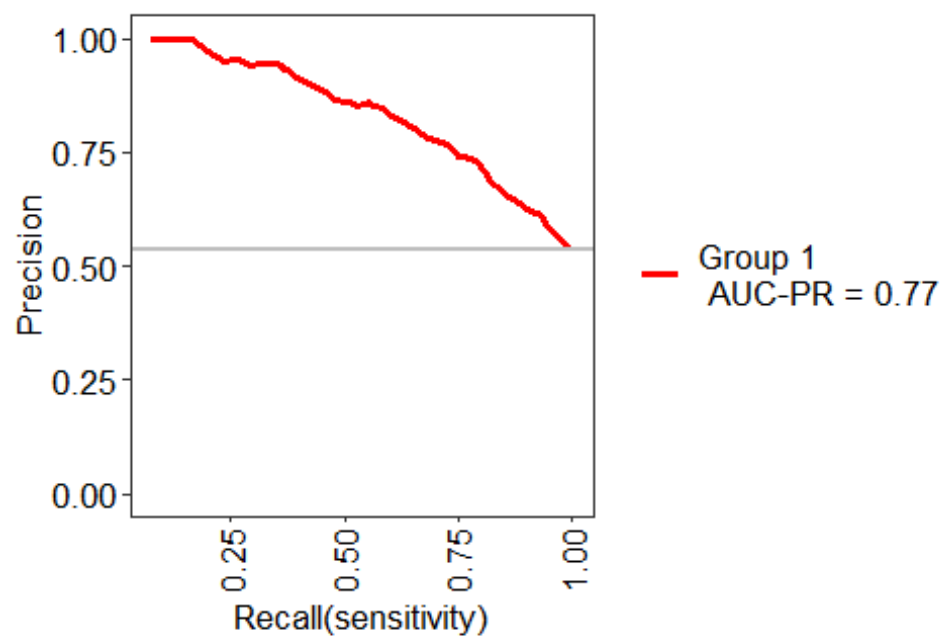



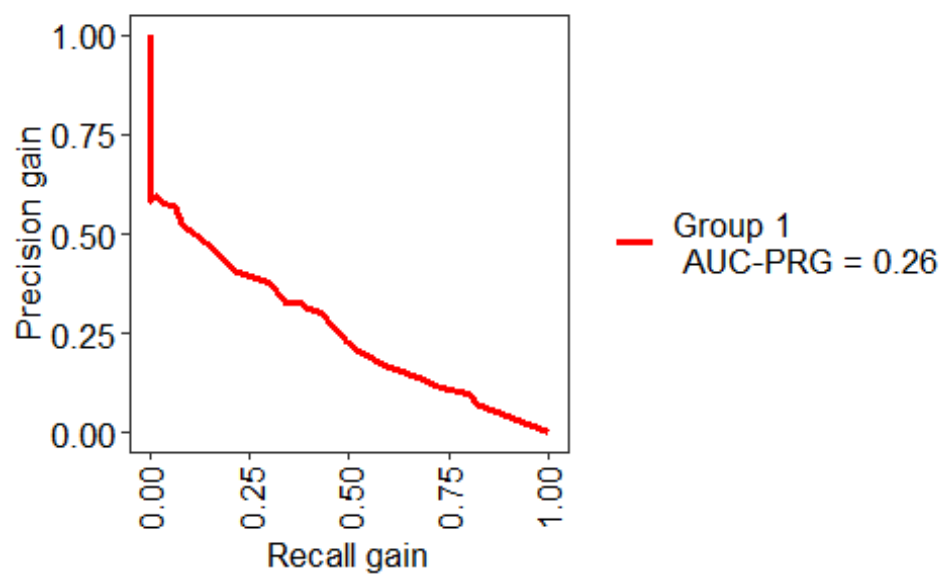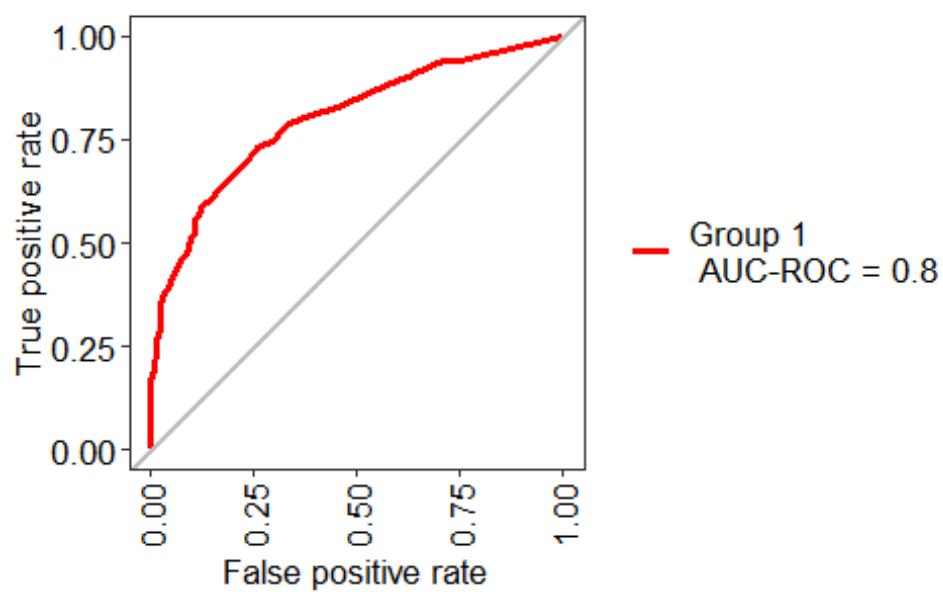

```
x_knsmote$stdres
```

```

## `$`Group 1`
##           Score      CI
## SENS      0.562 0.52-0.6
## SPEC      0.888 0.86-0.91
## MCC        0.470 <NA>
## Informedness 0.450 <NA>
## PREC      0.853 0.81-0.89
## NPV        0.637 0.6-0.67
## FPR        0.112 <NA>
## F1         0.678 <NA>
## TP         302.000 <NA>
## FP         52.000 <NA>
## TN         412.000 <NA>
## FN         235.000 <NA>
## AUC-ROC     0.800 0.77-0.83
## AUC-PR      0.770 <NA>
## AUC-PRG     0.260 <NA>

test_pred_knsmote <- predict(knn_fit_smote, newdata = testdata)
confusionMatrix(test_pred_knsmote, testdata$Outcome)

## Confusion Matrix and Statistics
##
##           Reference
## Prediction favor unfavor
##   favor      108      39
##   unfavor     100      50
##
##           Accuracy : 0.532
##           95% CI : (0.4735, 0.5898)
##   No Information Rate : 0.7003
##   P-Value [Acc > NIR] : 1
##
##           Kappa : 0.0677
##
## Mcnemar's Test P-Value : 3.597e-07
##
##           Sensitivity : 0.5192
##           Specificity : 0.5618
##           Pos Pred Value : 0.7347
##           Neg Pred Value : 0.3333
##           Prevalence : 0.7003
##           Detection Rate : 0.3636
##           Detection Prevalence : 0.4949
##           Balanced Accuracy : 0.5405
##
##           'Positive' Class : favor
##

```

```
test_prob_knnsmote <- predict(knn_fit_smote, newdata = testdata, type="prob")
mknsmote = data.frame(test_prob_knnsmote, testdata$Outcome)
yknnsmote<-evalm(mknsmote)
```

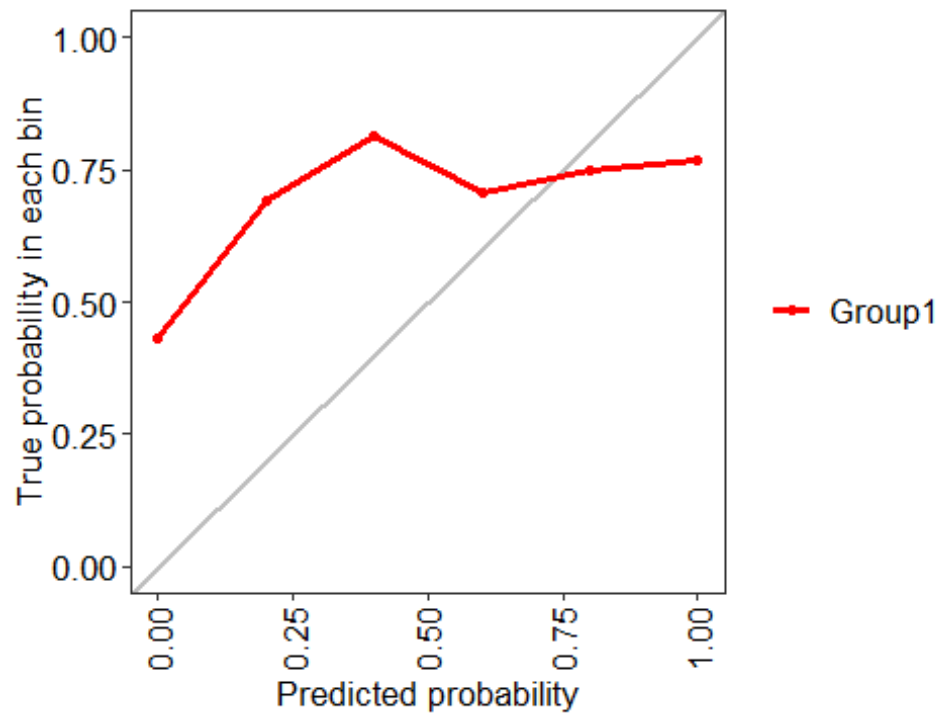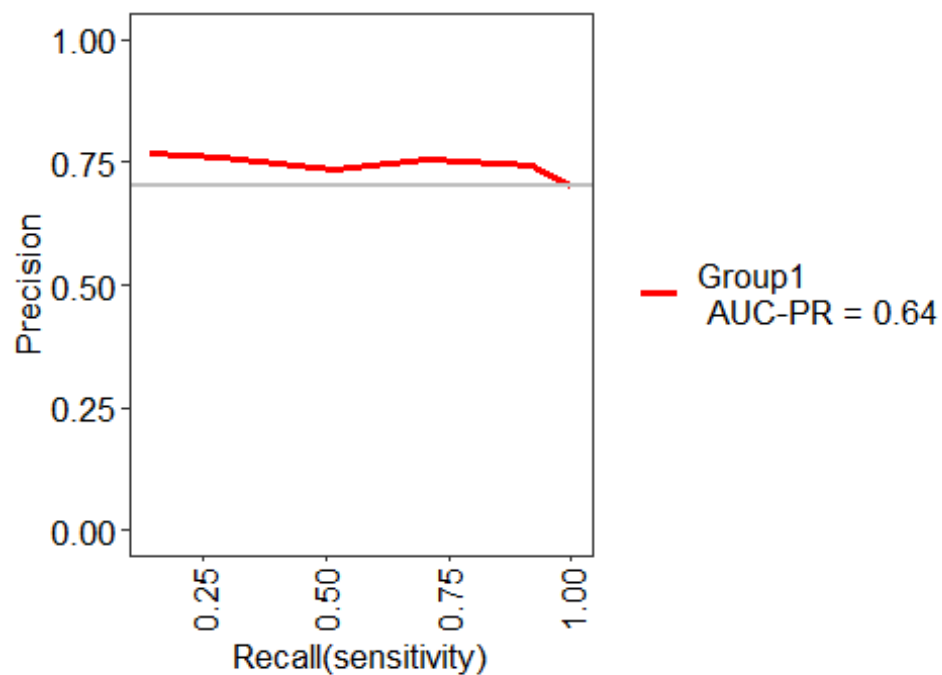

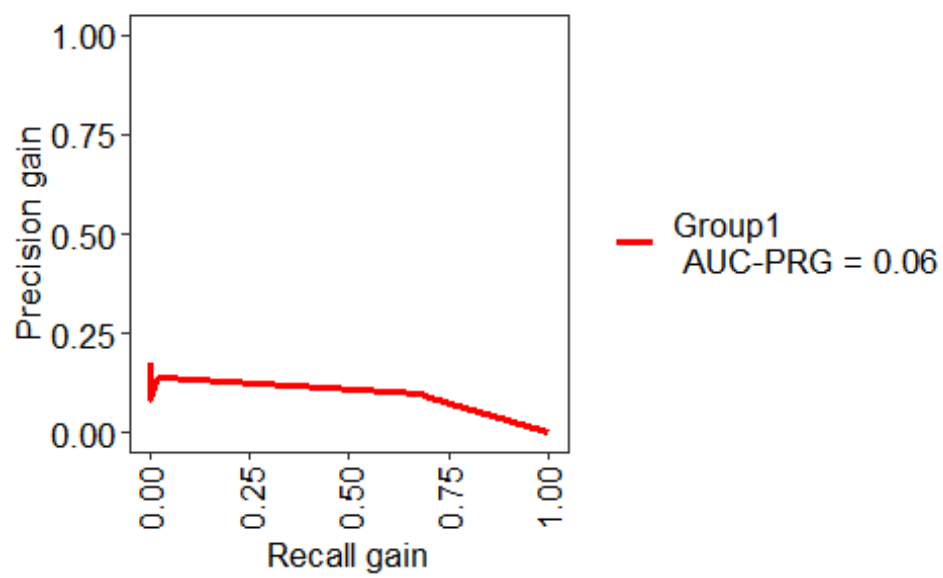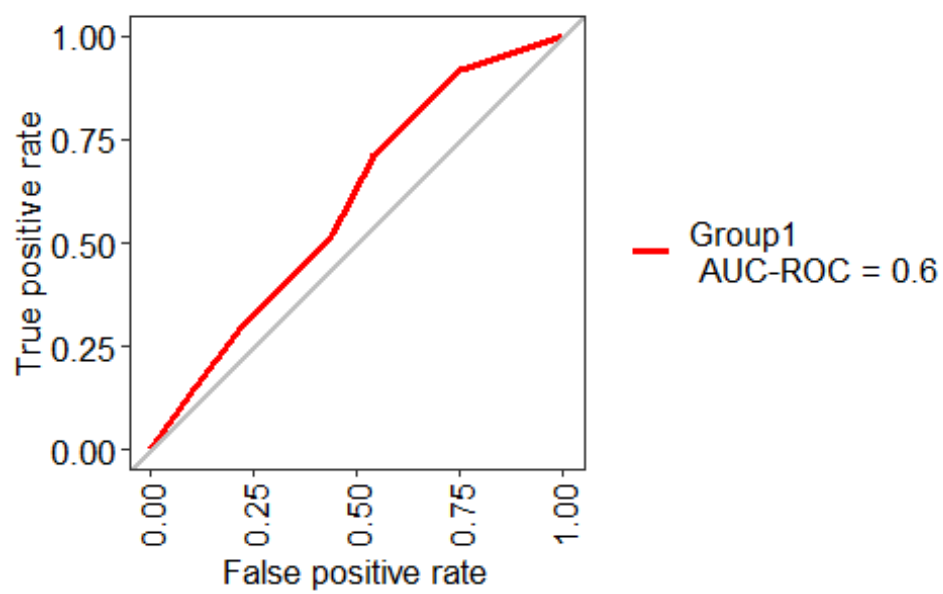

yknsmote\$stdres

```

## $Group1
##          Score      CI
## SENS      0.519 0.45-0.59
## SPEC      0.562 0.46-0.66
## MCC        0.074    <NA>
## Informedness 0.081    <NA>
## PREC      0.735 0.66-0.8
## NPV       0.333 0.26-0.41
## FPR       0.438    <NA>
## F1        0.608    <NA>
## TP        108.000    <NA>
## FP        39.000    <NA>
## TN        50.000    <NA>
## FN        100.000    <NA>
## AUC-ROC    0.600 0.53-0.67
## AUC-PR     0.640    <NA>
## AUC-PRG    0.060    <NA>

set.seed(seed)
lr_fit_smote<-train(class~., data = traindata.smote, method = "regLogistic",
                    trControl=ctrl, metric=metric, tuneLength=5, verbose=FALS
E)
lr_fit_smote

## Regularized Logistic Regression
##
## 1001 samples
##   60 predictor
##   2 classes: 'unfavor', 'favor'
##
## No pre-processing
## Resampling: Cross-Validated (10 fold, repeated 10 times)
## Summary of sample sizes: 901, 902, 901, 901, 901, 900, ...
## Resampling results across tuning parameters:
##
##  cost  loss      epsilon  ROC      Sens      Spec
##  0.25  L1       1e-04    0.7969245 0.6323959 0.7944514
##  0.25  L1       1e-03    0.7969850 0.6321832 0.7942662
##  0.25  L1       1e-02    0.7971942 0.6308973 0.7948218
##  0.25  L1       1e-01    0.7960505 0.6270259 0.7948253
##  0.25  L1       1e+00    0.7689637 0.6030065 0.7881237
##  0.25  L2_dual  1e-04    0.7929293 0.6347225 0.7925751
##  0.25  L2_dual  1e-03    0.7929332 0.6347225 0.7925751
##  0.25  L2_dual  1e-02    0.7929452 0.6347225 0.7927603
##  0.25  L2_dual  1e-01    0.7929293 0.6347225 0.7935115
##  0.25  L2_dual  1e+00    0.7929583 0.6332285 0.7937072
##  0.25  L2_primal 1e-04    0.7929412 0.6347225 0.7925751
##  0.25  L2_primal 1e-03    0.7929898 0.6349399 0.7927603
##  0.25  L2_primal 1e-02    0.7927406 0.6327798 0.7923934

```

|    |      |           |       |           |           |           |
|----|------|-----------|-------|-----------|-----------|-----------|
| ## | 0.25 | L2_primal | 1e-01 | 0.7901499 | 0.6295930 | 0.7940776 |
| ## | 0.25 | L2_primal | 1e+00 | 0.7765499 | 0.6058788 | 0.7973934 |
| ## | 0.50 | L1        | 1e-04 | 0.7956599 | 0.6302313 | 0.7916667 |
| ## | 0.50 | L1        | 1e-03 | 0.7956641 | 0.6298011 | 0.7914745 |
| ## | 0.50 | L1        | 1e-02 | 0.7959197 | 0.6304579 | 0.7905451 |
| ## | 0.50 | L1        | 1e-01 | 0.7960497 | 0.6269796 | 0.7929630 |
| ## | 0.50 | L1        | 1e+00 | 0.7625651 | 0.6041119 | 0.7796716 |
| ## | 0.50 | L2_dual   | 1e-04 | 0.7932344 | 0.6403191 | 0.7918274 |
| ## | 0.50 | L2_dual   | 1e-03 | 0.7932344 | 0.6403191 | 0.7918274 |
| ## | 0.50 | L2_dual   | 1e-02 | 0.7932427 | 0.6403191 | 0.7916422 |
| ## | 0.50 | L2_dual   | 1e-01 | 0.7932417 | 0.6401110 | 0.7920126 |
| ## | 0.50 | L2_dual   | 1e+00 | 0.7928623 | 0.6390333 | 0.7914535 |
| ## | 0.50 | L2_primal | 1e-04 | 0.7932303 | 0.6403191 | 0.7918274 |
| ## | 0.50 | L2_primal | 1e-03 | 0.7932786 | 0.6398890 | 0.7912718 |
| ## | 0.50 | L2_primal | 1e-02 | 0.7931668 | 0.6396762 | 0.7918309 |
| ## | 0.50 | L2_primal | 1e-01 | 0.7906780 | 0.6345097 | 0.7927778 |
| ## | 0.50 | L2_primal | 1e+00 | 0.7778085 | 0.6093293 | 0.7958980 |
| ## | 1.00 | L1        | 1e-04 | 0.7942840 | 0.6358326 | 0.7918414 |
| ## | 1.00 | L1        | 1e-03 | 0.7941958 | 0.6356198 | 0.7918414 |
| ## | 1.00 | L1        | 1e-02 | 0.7936938 | 0.6315264 | 0.7909154 |
| ## | 1.00 | L1        | 1e-01 | 0.7943349 | 0.6302220 | 0.7922257 |
| ## | 1.00 | L1        | 1e+00 | 0.7585264 | 0.6062211 | 0.7685639 |
| ## | 1.00 | L2_dual   | 1e-04 | 0.7936385 | 0.6435338 | 0.7918274 |
| ## | 1.00 | L2_dual   | 1e-03 | 0.7936426 | 0.6435338 | 0.7918274 |
| ## | 1.00 | L2_dual   | 1e-02 | 0.7936588 | 0.6435338 | 0.7920161 |
| ## | 1.00 | L2_dual   | 1e-01 | 0.7936349 | 0.6439685 | 0.7920161 |
| ## | 1.00 | L2_dual   | 1e+00 | 0.7932739 | 0.6413969 | 0.7901642 |
| ## | 1.00 | L2_primal | 1e-04 | 0.7936385 | 0.6435338 | 0.7918274 |
| ## | 1.00 | L2_primal | 1e-03 | 0.7936465 | 0.6437465 | 0.7914570 |
| ## | 1.00 | L2_primal | 1e-02 | 0.7935280 | 0.6435291 | 0.7920126 |
| ## | 1.00 | L2_primal | 1e-01 | 0.7914801 | 0.6385846 | 0.7931551 |
| ## | 1.00 | L2_primal | 1e+00 | 0.7782699 | 0.6128076 | 0.7953215 |
| ## | 2.00 | L1        | 1e-04 | 0.7935205 | 0.6418409 | 0.7927743 |
| ## | 2.00 | L1        | 1e-03 | 0.7934173 | 0.6420537 | 0.7925856 |
| ## | 2.00 | L1        | 1e-02 | 0.7926995 | 0.6401156 | 0.7899755 |
| ## | 2.00 | L1        | 1e-01 | 0.7911561 | 0.6308557 | 0.7914885 |
| ## | 2.00 | L1        | 1e+00 | 0.7606968 | 0.6127428 | 0.7687282 |
| ## | 2.00 | L2_dual   | 1e-04 | 0.7936976 | 0.6480620 | 0.7916422 |
| ## | 2.00 | L2_dual   | 1e-03 | 0.7937015 | 0.6480620 | 0.7916422 |
| ## | 2.00 | L2_dual   | 1e-02 | 0.7937178 | 0.6480620 | 0.7918274 |
| ## | 2.00 | L2_dual   | 1e-01 | 0.7938023 | 0.6480574 | 0.7916422 |
| ## | 2.00 | L2_dual   | 1e+00 | 0.7933012 | 0.6471878 | 0.7907128 |
| ## | 2.00 | L2_primal | 1e-04 | 0.7937057 | 0.6480620 | 0.7916422 |
| ## | 2.00 | L2_primal | 1e-03 | 0.7937221 | 0.6480620 | 0.7916422 |
| ## | 2.00 | L2_primal | 1e-02 | 0.7936337 | 0.6480574 | 0.7918274 |
| ## | 2.00 | L2_primal | 1e-01 | 0.7919345 | 0.6418363 | 0.7920300 |
| ## | 2.00 | L2_primal | 1e+00 | 0.7784615 | 0.6149537 | 0.7934696 |
| ## | 4.00 | L1        | 1e-04 | 0.7934949 | 0.6448520 | 0.7923899 |
| ## | 4.00 | L1        | 1e-03 | 0.7933116 | 0.6448381 | 0.7923899 |

```

## 4.00 L1 1e-02 0.7918242 0.6426735 0.7905346
## 4.00 L1 1e-01 0.7900653 0.6355550 0.7907268
## 4.00 L1 1e+00 0.7558755 0.5988945 0.7629804
## 4.00 L2_dual 1e-04 0.7935897 0.6480666 0.7916387
## 4.00 L2_dual 1e-03 0.7935897 0.6480666 0.7916387
## 4.00 L2_dual 1e-02 0.7935815 0.6480666 0.7916387
## 4.00 L2_dual 1e-01 0.7936214 0.6484921 0.7918239
## 4.00 L2_dual 1e+00 0.7932773 0.6485338 0.7901677
## 4.00 L2_primal 1e-04 0.7935976 0.6480666 0.7916387
## 4.00 L2_primal 1e-03 0.7935613 0.6480666 0.7916387
## 4.00 L2_primal 1e-02 0.7935213 0.6487095 0.7910797
## 4.00 L2_primal 1e-01 0.7919995 0.6446531 0.7907268
## 4.00 L2_primal 1e+00 0.7783605 0.6149537 0.7932949
##
## ROC was used to select the optimal model using the largest value.
## The final values used for the model were cost = 0.25, loss = L1 and epsilon
## = 0.01.

xlrsMOTE <- evalm(lr_fit_smote)

```

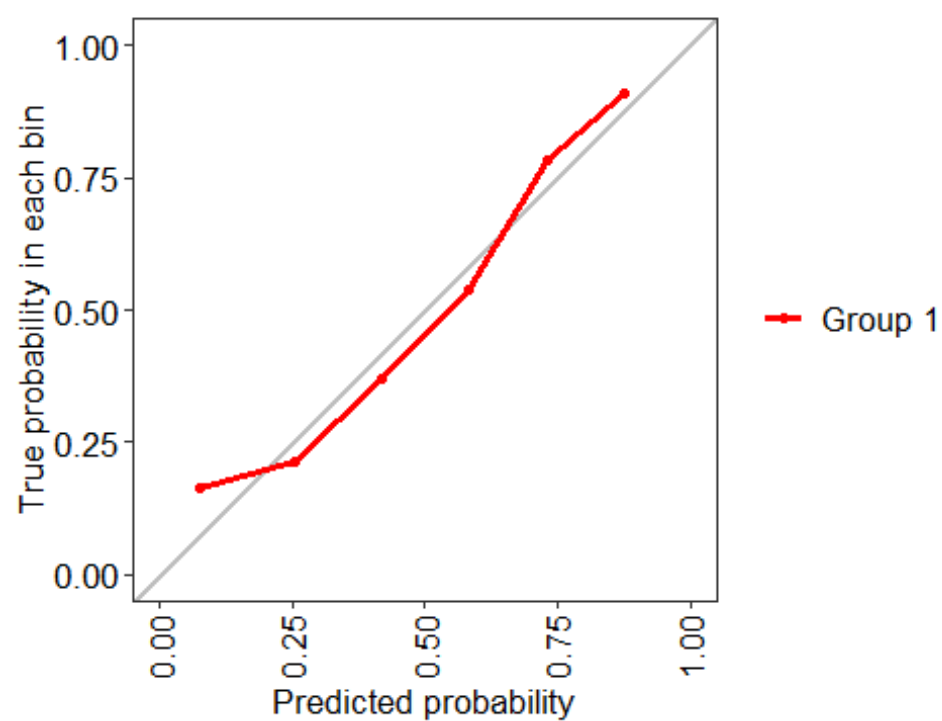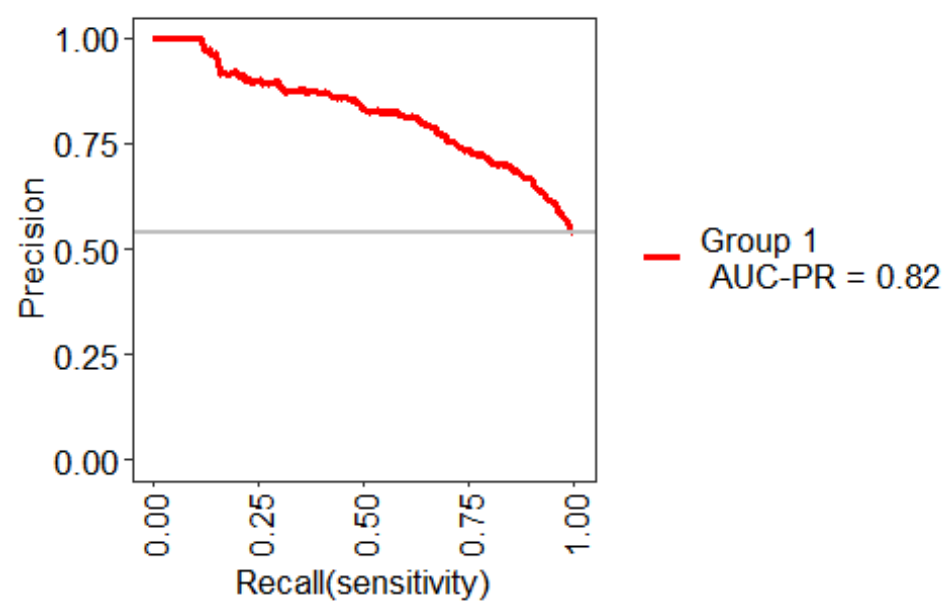



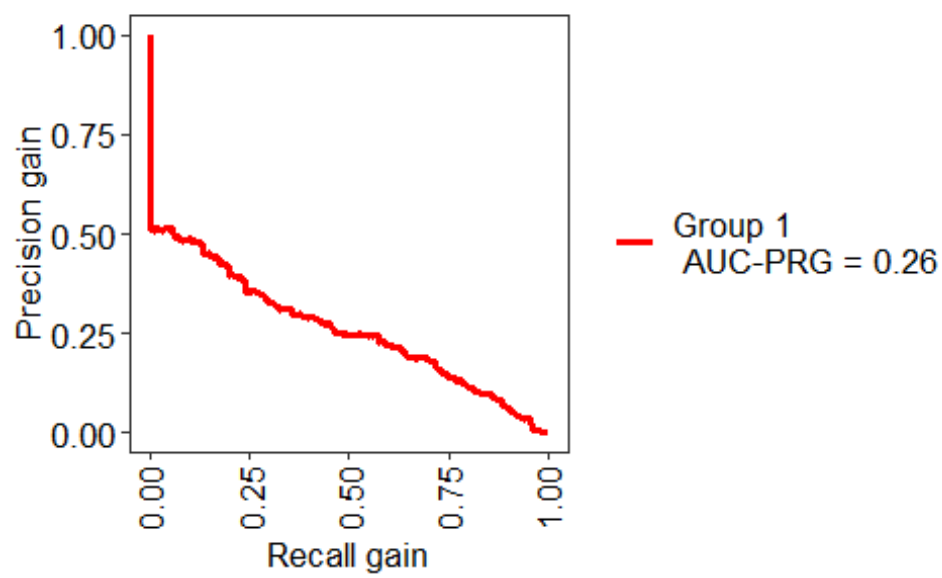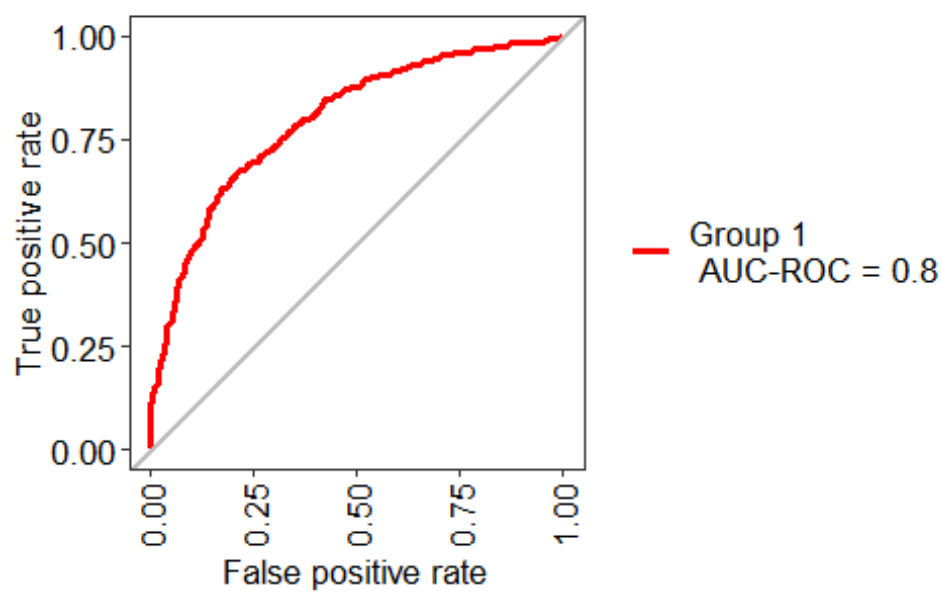

```
xlrsmote$stdres
```

```

## `$`Group 1`
##           Score      CI
## SENS      0.791 0.76-0.82
## SPEC      0.636 0.59-0.68
## MCC       0.434    <NA>
## Informedness 0.427    <NA>
## PREC      0.715 0.68-0.75
## NPV       0.725 0.68-0.77
## FPR       0.364    <NA>
## F1        0.752    <NA>
## TP        425.000    <NA>
## FP        169.000    <NA>
## TN        295.000    <NA>
## FN        112.000    <NA>
## AUC-ROC    0.800 0.77-0.83
## AUC-PR     0.820    <NA>
## AUC-PRG    0.260    <NA>

test_pred_lrsmote <- predict(lr_fit_smote, newdata = testdata)
confusionMatrix(test_pred_lrsmote, testdata$Outcome)

## Confusion Matrix and Statistics
##
##           Reference
## Prediction favor unfavor
##   favor      172      28
##   unfavor     36      61
##
##           Accuracy : 0.7845
##           95% CI : (0.7333, 0.8299)
##   No Information Rate : 0.7003
##   P-Value [Acc > NIR] : 0.0007089
##
##           Kappa : 0.4995
##
##  Mcnemar's Test P-Value : 0.3815739
##
##           Sensitivity : 0.8269
##           Specificity : 0.6854
##   Pos Pred Value : 0.8600
##   Neg Pred Value : 0.6289
##   Prevalence : 0.7003
##   Detection Rate : 0.5791
##   Detection Prevalence : 0.6734
##   Balanced Accuracy : 0.7562
##
##   'Positive' Class : favor
##

```

```
test_prob_lrsmote <- predict(lr_fit_smote, newdata = testdata, type="prob")
mlrsmote = data.frame(test_prob_lrsmote, testdata$Outcome)
ylrsmote<-evalm(mlrsmote)
```

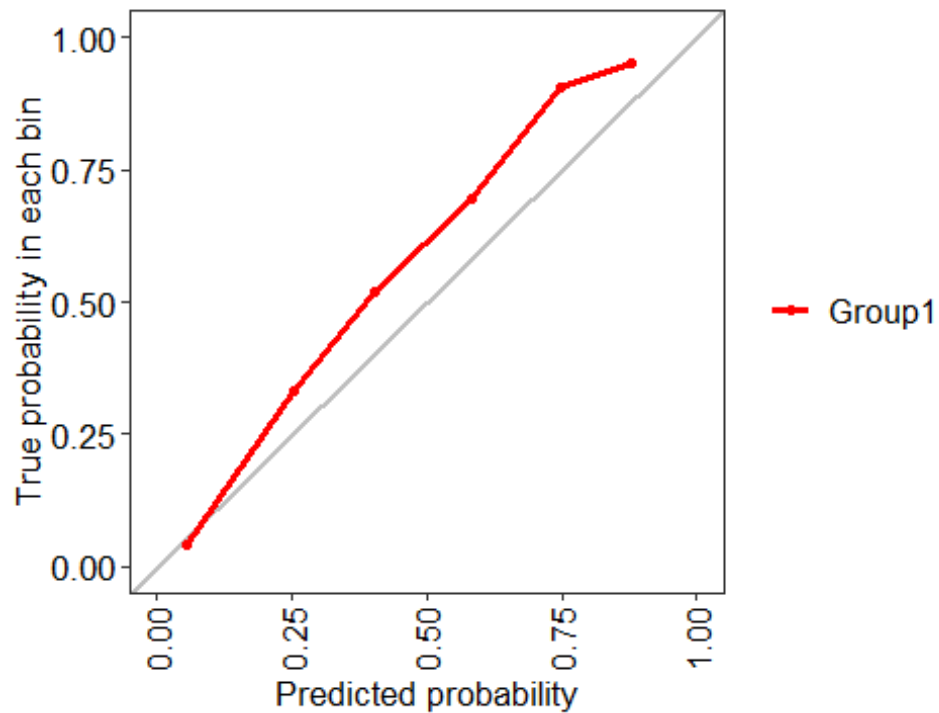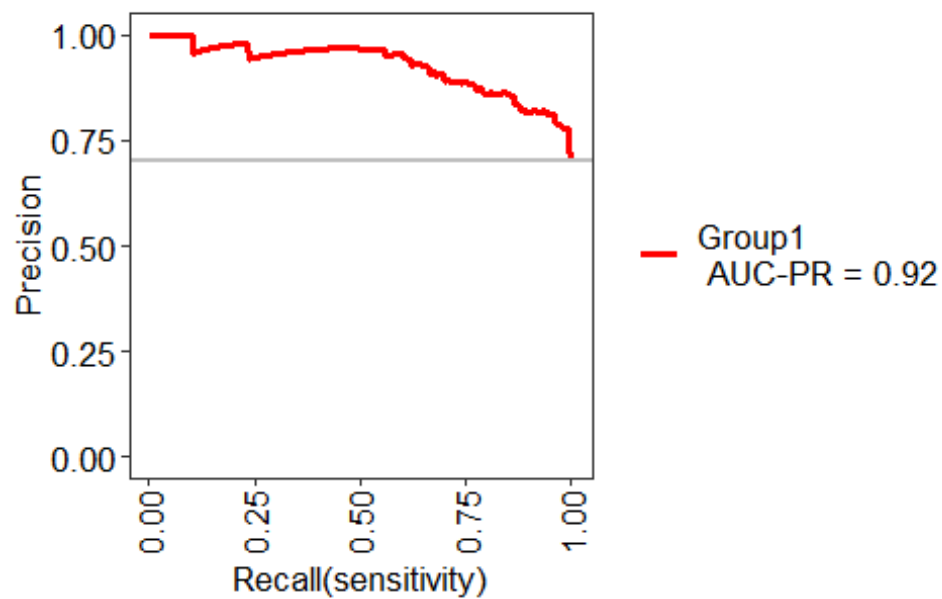

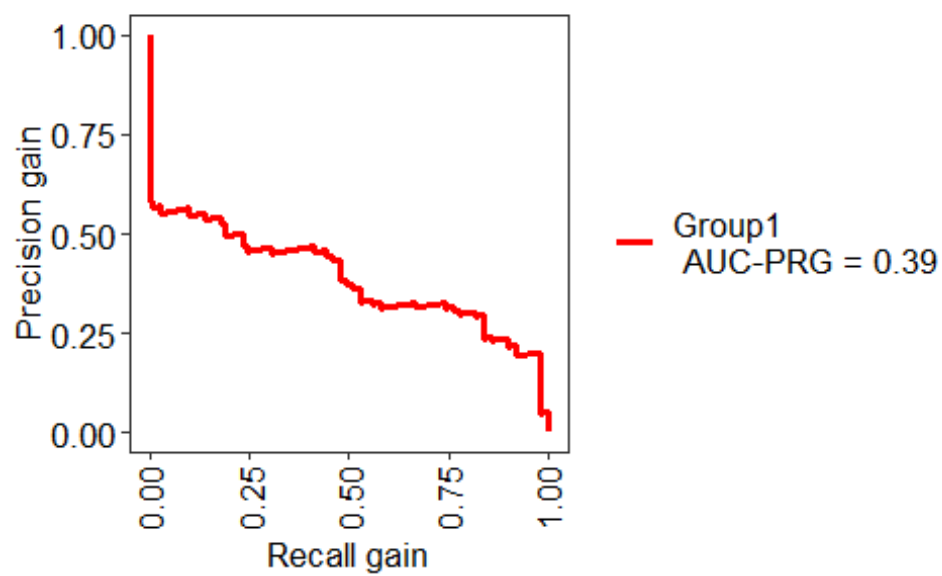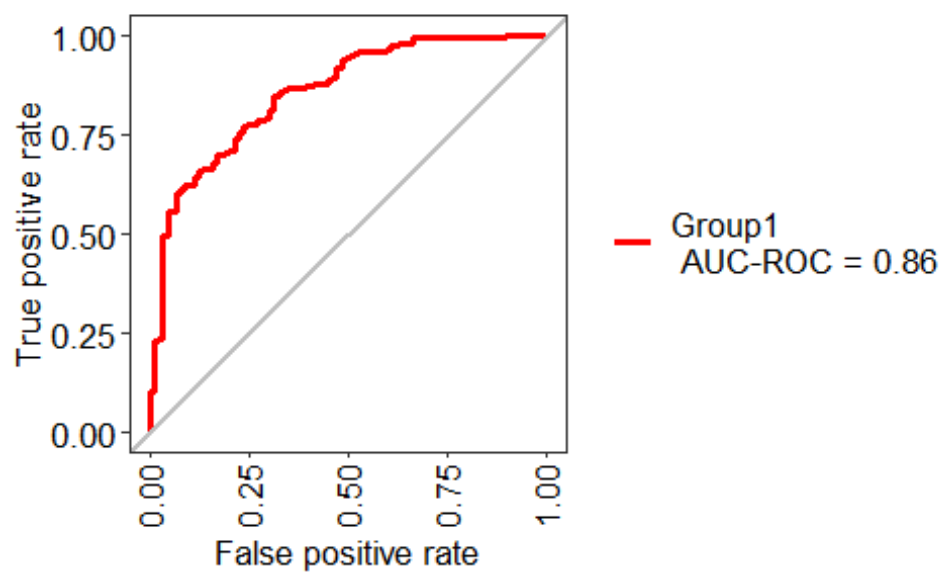

```
ylrsmote$stdres
```

```

## $Group1
##           Score      CI
## SENS      0.827 0.77-0.87
## SPEC      0.685 0.58-0.77
## MCC       0.500      <NA>
## Informedness 0.512      <NA>
## PREC      0.860 0.81-0.9
## NPV       0.629 0.53-0.72
## FPR       0.315      <NA>
## F1        0.843      <NA>
## TP        172.000      <NA>
## FP        28.000      <NA>
## TN        61.000      <NA>
## FN        36.000      <NA>
## AUC-ROC    0.860 0.82-0.9
## AUC-PR     0.920      <NA>
## AUC-PRG    0.390      <NA>

set.seed(seed)
traindata.adas <- ADAS(traindata[,-1], traindata$Outcome)
traindata.adas <- traindata.adas$data
traindata.adas$class<-as.factor(traindata.adas$class)
table(traindata.adas$class)

##
## unfavor    favor
##      555      537

set.seed(seed)
rf_fit_adas1 <- train(class~., data = traindata.adas, method = "rf",
                      trControl=ctrl, metric=metric, tuneLength=10,
                      ntree=500, verbose=FALSE)

rf_fit_adas1

## Random Forest
##
## 1092 samples
## 60 predictor
## 2 classes: 'unfavor', 'favor'
##
## No pre-processing
## Resampling: Cross-Validated (10 fold, repeated 10 times)
## Summary of sample sizes: 982, 984, 983, 983, 983, 982, ...
## Resampling results across tuning parameters:
##
## mtry ROC      Sens      Spec
## 2    0.9416938 0.8126656 0.8921698
## 8    0.9476428 0.8747727 0.8549022
## 14   0.9433361 0.8848864 0.8290496
## 21   0.9382339 0.8866721 0.8156464

```

```
## 27 0.9337678 0.8888344 0.8100559
## 34 0.9306829 0.8876039 0.8096716
## 40 0.9282187 0.8886623 0.8070929
## 47 0.9256722 0.8885097 0.8027848
## 53 0.9247812 0.8867045 0.8043047
## 60 0.9230139 0.8870714 0.8007338
##
## ROC was used to select the optimal model using the largest value.
## The final value used for the model was mtry = 8.
xadas1 <- evalm(rf_fit_adas1)
```

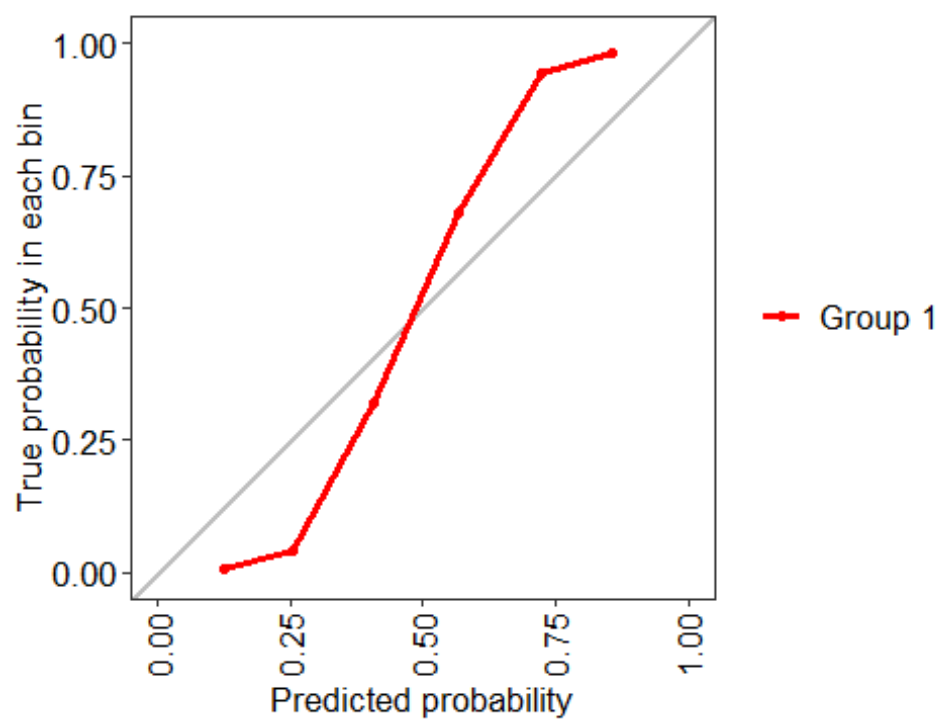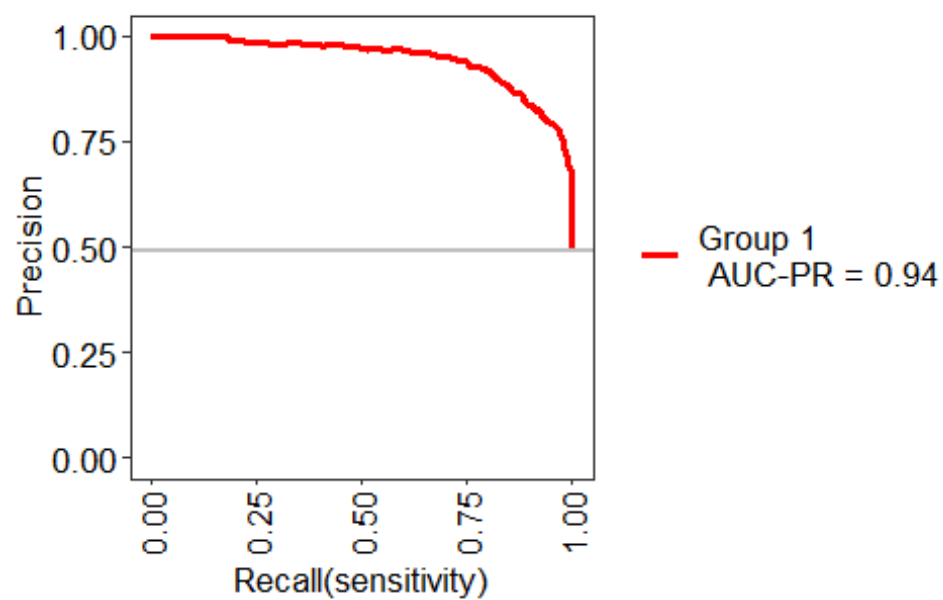

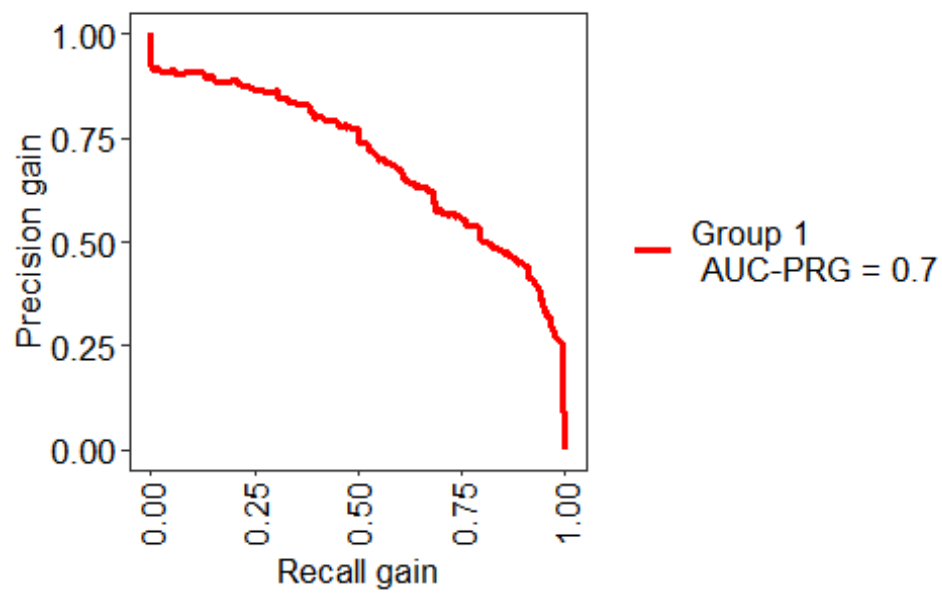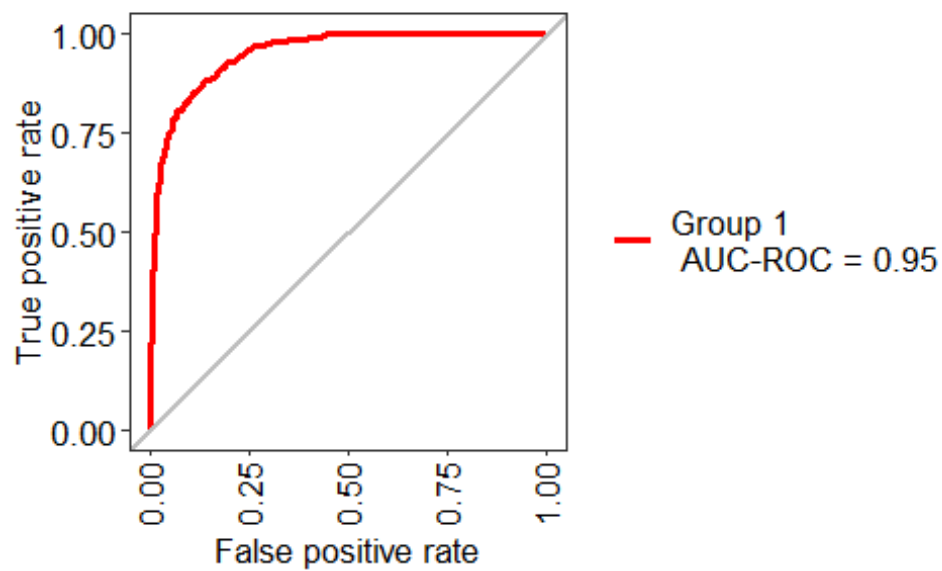

xadas1\$stdres



```

## `$`Group 1`
##           Score      CI
## SENS      0.857 0.82-0.88
## SPEC      0.876 0.85-0.9
## MCC       0.733      <NA>
## Informedness 0.732      <NA>
## PREC      0.870 0.84-0.9
## NPV       0.863 0.83-0.89
## FPR       0.124      <NA>
## F1        0.863      <NA>
## TP        460.000      <NA>
## FP        69.000      <NA>
## TN        486.000      <NA>
## FN        77.000      <NA>
## AUC-ROC    0.950 0.94-0.96
## AUC-PR     0.940      <NA>
## AUC-PRG    0.700      <NA>

test_pred_rfadas1 <- predict(rf_fit_adas1, newdata = testdata)
confusionMatrix(test_pred_rfadas1, testdata$Outcome)

## Confusion Matrix and Statistics
##
##           Reference
## Prediction favor unfavor
##   favor      183      40
##   unfavor     25      49
##
##           Accuracy : 0.7811
##           95% CI : (0.7297, 0.8268)
##   No Information Rate : 0.7003
##   P-Value [Acc > NIR] : 0.001122
##
##           Kappa : 0.4522
##
##  Mcnemar's Test P-Value : 0.082478
##
##           Sensitivity : 0.8798
##           Specificity : 0.5506
##   Pos Pred Value : 0.8206
##   Neg Pred Value : 0.6622
##   Prevalence : 0.7003
##   Detection Rate : 0.6162
##   Detection Prevalence : 0.7508
##   Balanced Accuracy : 0.7152
##
##   'Positive' Class : favor
##

```

```
test_prob_adas1 <- predict(rf_fit_adas1, newdata = testdata, type="prob")
madas1 = data.frame(test_prob_adas1, testdata$Outcome)
yadas1<-evalm(madas1)
```

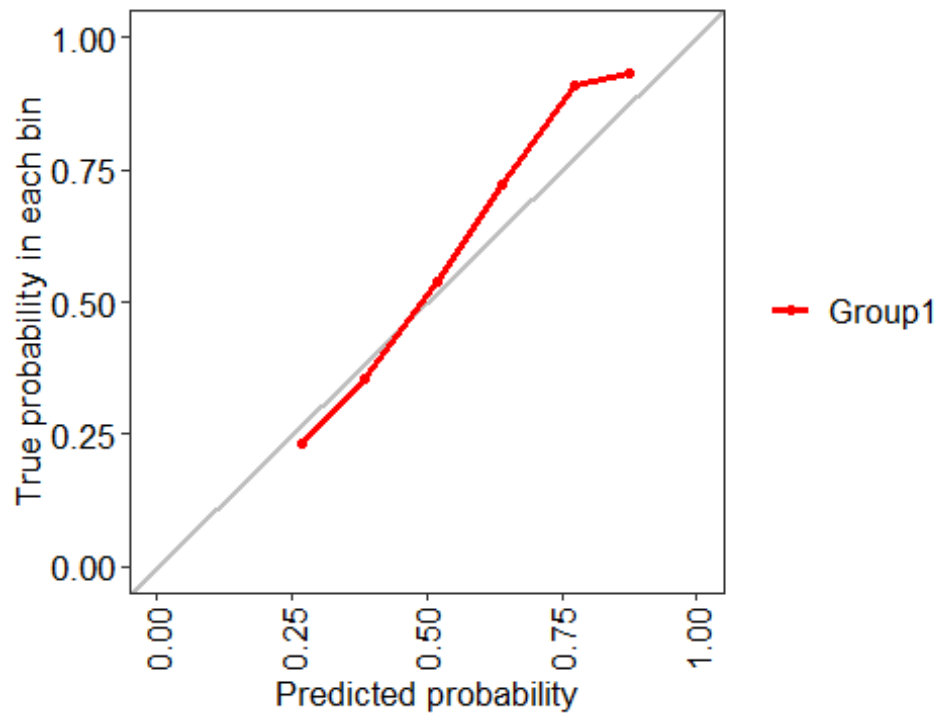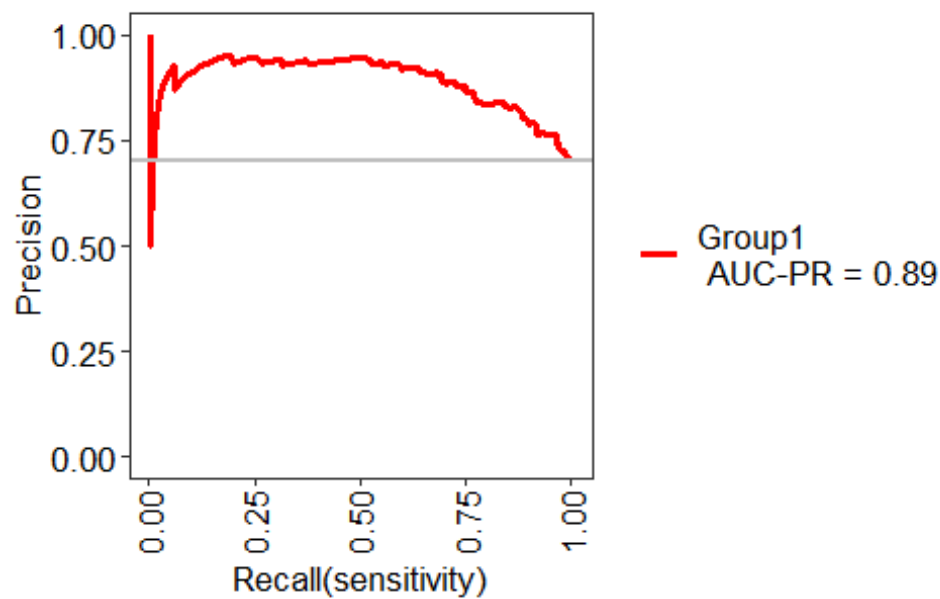

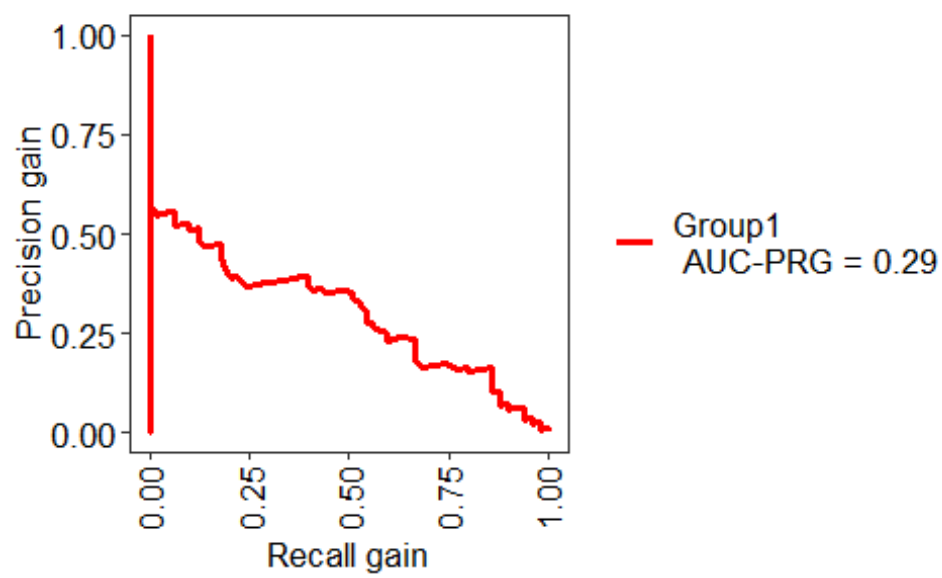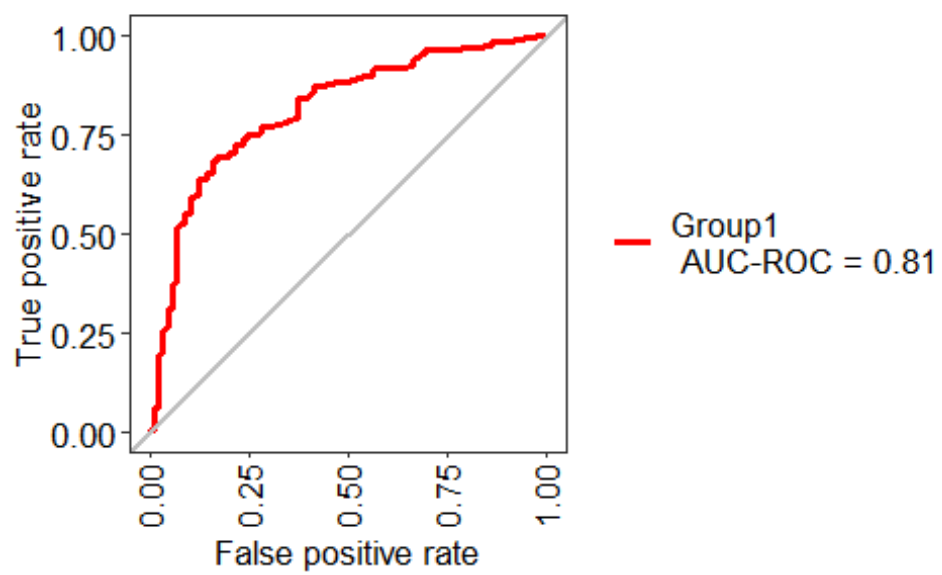

yadas1\$stdres

```
## $Group1
##          Score      CI
## SENS      0.880 0.83-0.92
## SPEC      0.539 0.44-0.64
## MCC        0.446    <NA>
## Informedness 0.419    <NA>
## PREC      0.817 0.76-0.86
## NPV        0.658 0.54-0.76
## FPR        0.461    <NA>
## F1         0.847    <NA>
## TP        183.000    <NA>
## FP         41.000    <NA>
## TN         48.000    <NA>
## FN         25.000    <NA>
## AUC-ROC     0.810 0.76-0.86
## AUC-PR      0.890    <NA>
## AUC-PRG     0.290    <NA>

imp_adas1<-varImp(rf_fit_adas1, scale = FALSE)
imp_adas1

## rf variable importance
##
##   only 20 most important variables shown (out of 60)
##
##          Overall
## NIHSS_adm    83.812
## Age          44.127
## Arrival      24.509
## Hb           20.915
## RanGlu       20.481
## TG           18.801
## SBP          17.547
## PLT          17.306
## BMI          17.145
## HDL          16.936
## TC           16.690
## DBP          16.294
## BUN          16.026
## LDL          15.836
## HbA1C        15.335
## AC           14.873
## Cr           13.689
## Circulation.2 9.191
## Circulation.1 7.601
## Sex.Male      6.692

plot(imp_adas1)
```

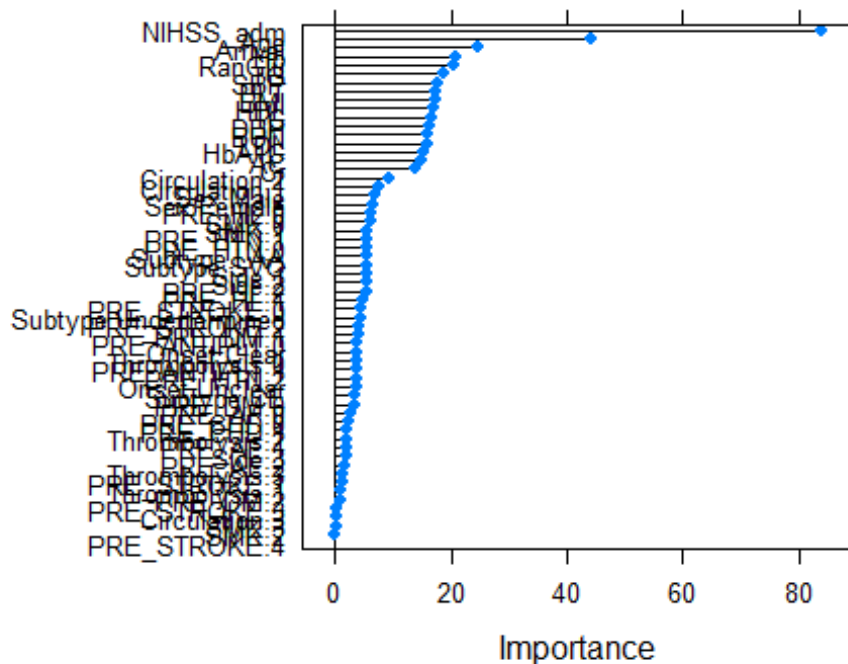

```
set.seed(seed)
rf_fit_adas2 <- train(class~., data = traindata.adas, method = "rf",
                      trControl=ctrl, metric=metric, tuneLength=10,
                      ntree=1000, verbose=FALSE)

rf_fit_adas2

## Random Forest
##
## 1092 samples
## 60 predictor
## 2 classes: 'unfavor', 'favor'
##
## No pre-processing
## Resampling: Cross-Validated (10 fold, repeated 10 times)
## Summary of sample sizes: 982, 984, 983, 983, 983, 982, ...
## Resampling results across tuning parameters:
##
## mtry ROC Sens Spec
## 2 0.9435779 0.8155325 0.8979280
## 8 0.9480666 0.8729935 0.8549196
## 14 0.9437288 0.8857825 0.8307128
## 21 0.9384581 0.8893896 0.8163802
## 27 0.9348037 0.8893734 0.8124738
## 34 0.9312007 0.8890390 0.8096751
## 40 0.9288731 0.8888279 0.8074668
## 47 0.9260299 0.8885000 0.8038889
```

```
##    53    0.9248544  0.8854448  0.8046506
##    60    0.9232808  0.8872468  0.8014710
##
## ROC was used to select the optimal model using the largest value.
## The final value used for the model was mtry = 8.
xadas2 <- evalm(rf_fit_adas2)
```

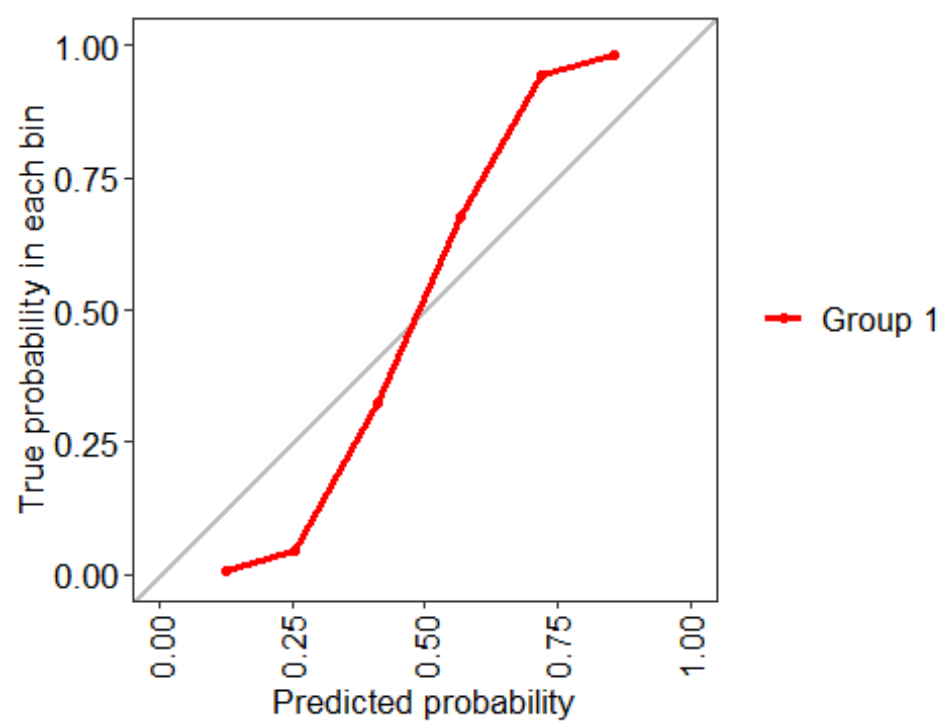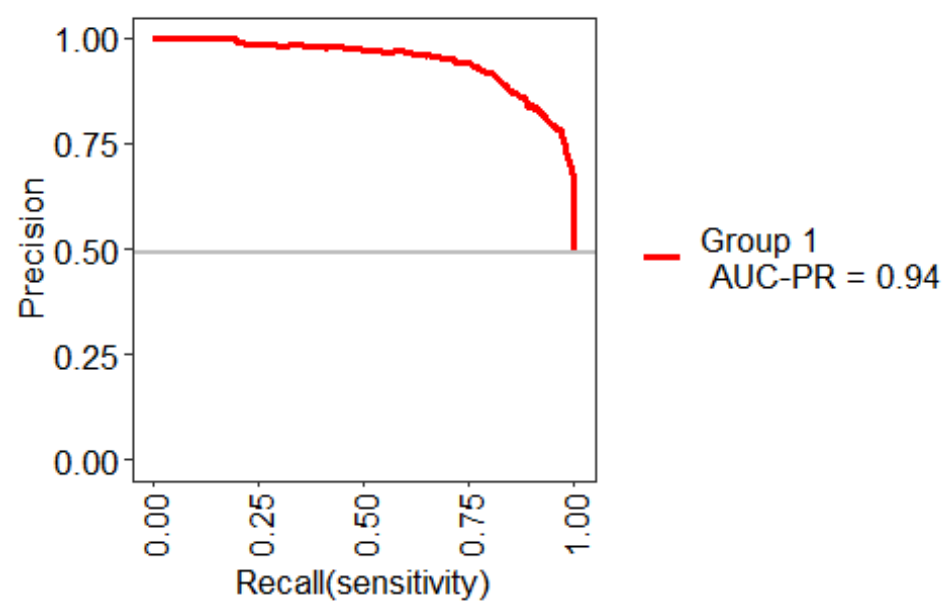

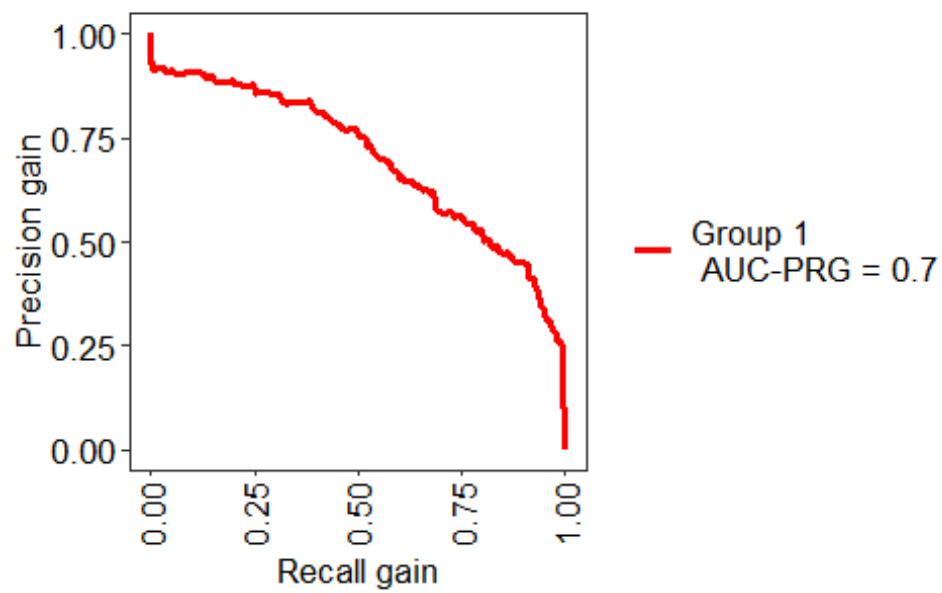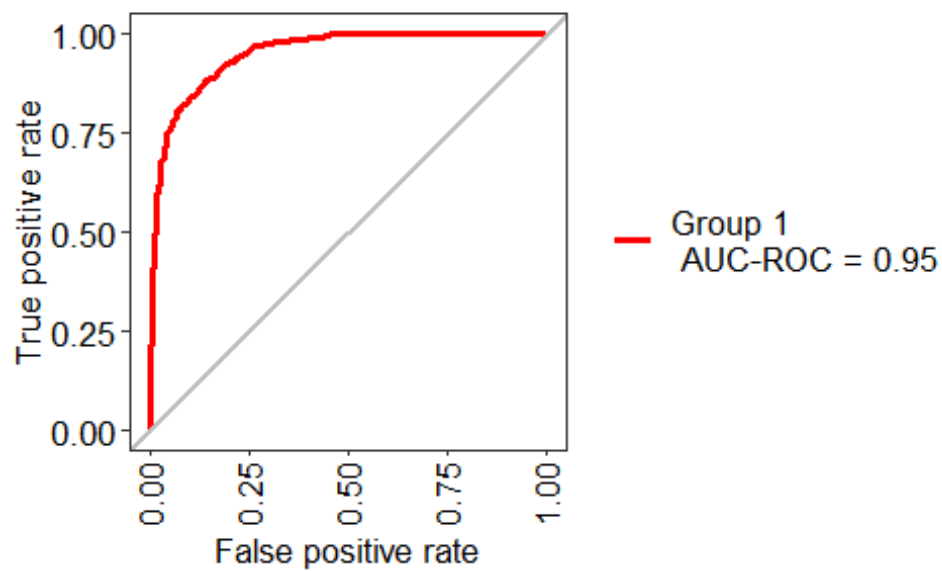

xadas2\$stdres



```

## `$`Group 1`
##           Score      CI
## SENS      0.857 0.82-0.88
## SPEC      0.876 0.85-0.9
## MCC       0.733      <NA>
## Informedness 0.732      <NA>
## PREC      0.870 0.84-0.9
## NPV       0.863 0.83-0.89
## FPR       0.124      <NA>
## F1        0.863      <NA>
## TP        460.000      <NA>
## FP        69.000      <NA>
## TN        486.000      <NA>
## FN        77.000      <NA>
## AUC-ROC    0.950 0.94-0.96
## AUC-PR     0.940      <NA>
## AUC-PRG    0.700      <NA>

test_pred_rfadas2 <- predict(rf_fit_adas2, newdata = testdata)
confusionMatrix(test_pred_rfadas2, testdata$Outcome)

## Confusion Matrix and Statistics
##
##           Reference
## Prediction favor unfavor
##   favor      183      41
##   unfavor     25      48
##
##           Accuracy : 0.7778
##           95% CI : (0.7262, 0.8238)
##   No Information Rate : 0.7003
##   P-Value [Acc > NIR] : 0.001743
##
##           Kappa : 0.4419
##
##  Mcnemar's Test P-Value : 0.064838
##
##           Sensitivity : 0.8798
##           Specificity : 0.5393
##   Pos Pred Value : 0.8170
##   Neg Pred Value : 0.6575
##   Prevalence : 0.7003
##   Detection Rate : 0.6162
##   Detection Prevalence : 0.7542
##   Balanced Accuracy : 0.7096
##
##   'Positive' Class : favor
##

```

```
test_prob_adas2 <- predict(rf_fit_adas2, newdata = testdata, type="prob")
madas2 = data.frame(test_prob_adas2, testdata$Outcome)
yadas2<-evalm(madas2)
```

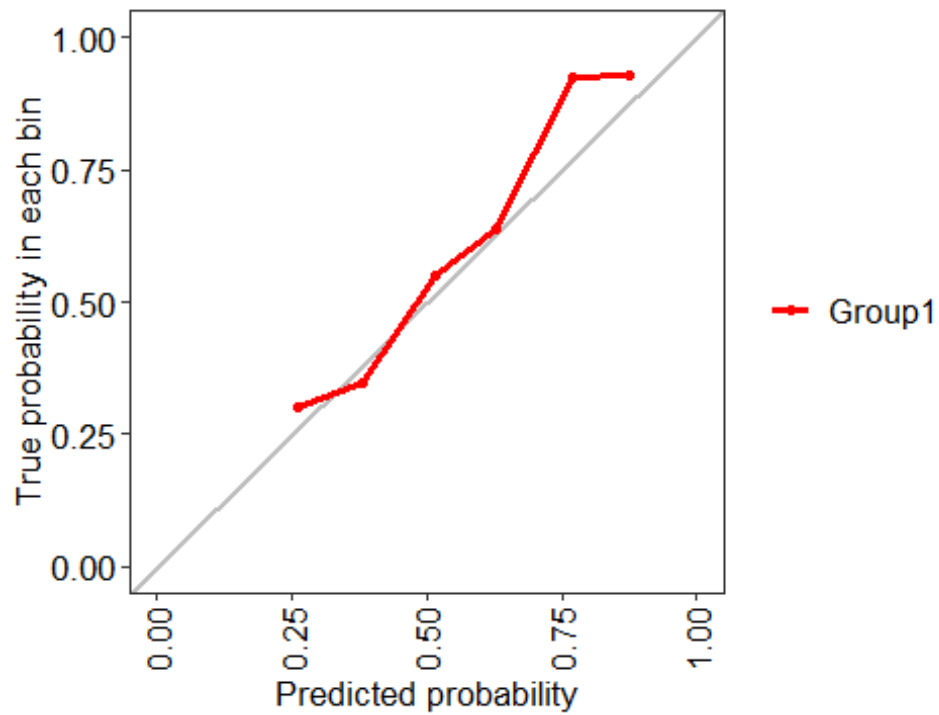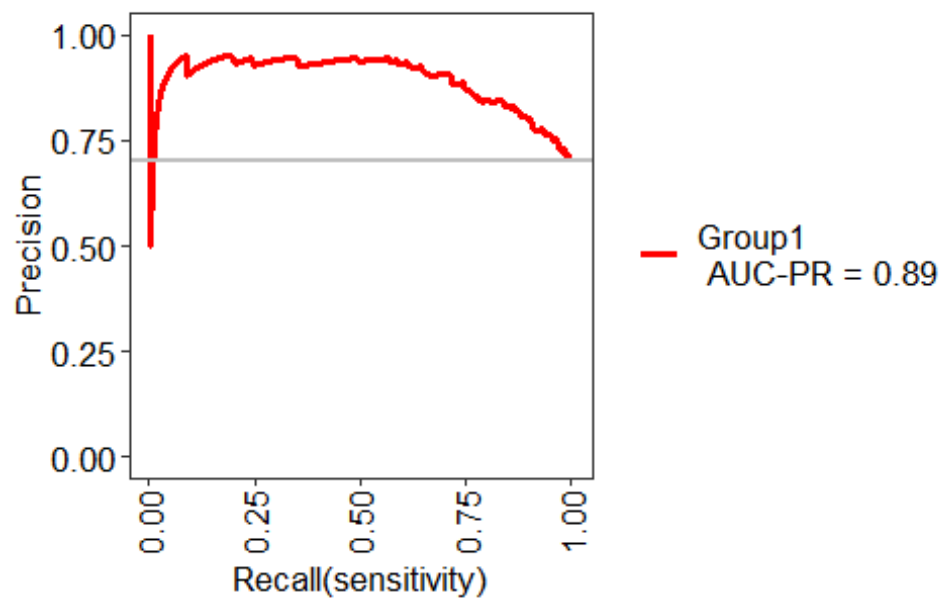

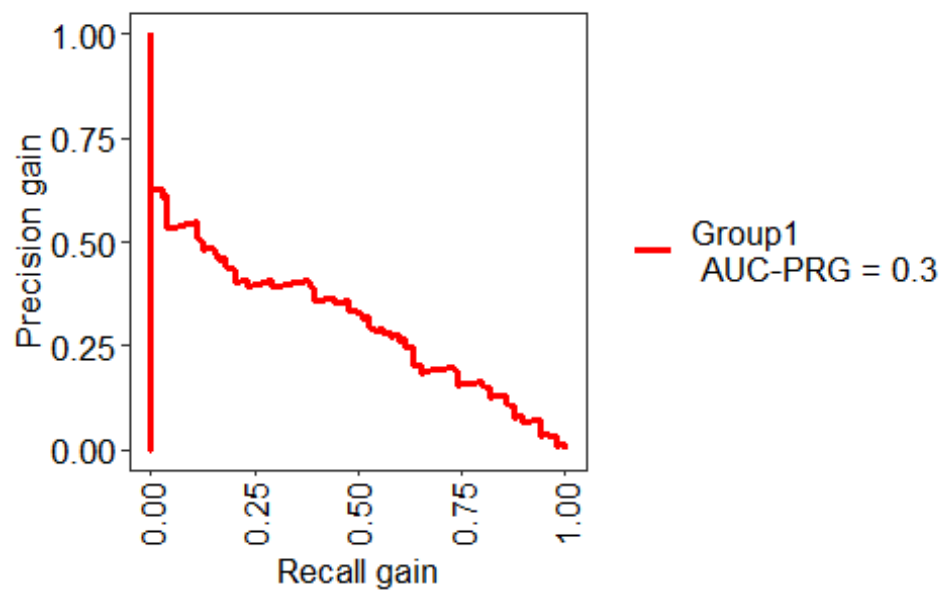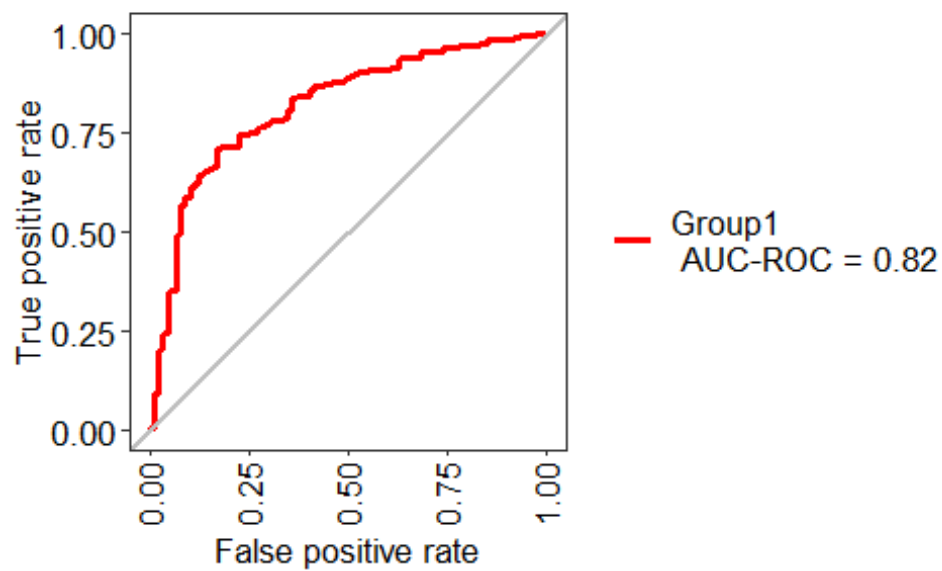

yadas2\$stdres

```
## $Group1
##          Score      CI
## SENS      0.880 0.83-0.92
## SPEC      0.528 0.43-0.63
## MCC        0.436    <NA>
## Informedness 0.408    <NA>
## PREC      0.813 0.76-0.86
## NPV        0.653 0.54-0.75
## FPR        0.472    <NA>
## F1         0.845    <NA>
## TP        183.000    <NA>
## FP         42.000    <NA>
## TN         47.000    <NA>
## FN         25.000    <NA>
## AUC-ROC     0.820 0.77-0.87
## AUC-PR      0.890    <NA>
## AUC-PRG     0.300    <NA>

imp_adas2<-varImp(rf_fit_adas2, scale = FALSE)
imp_adas2

## rf variable importance
##
##   only 20 most important variables shown (out of 60)
##
##          Overall
## NIHSS_adm    84.779
## Age          43.061
## Arrival      24.087
## Hb           21.055
## RanGlu       20.460
## TG           19.011
## SBP          17.472
## BMI          17.302
## PLT          17.117
## HDL          17.080
## DBP          16.460
## TC           16.120
## BUN          15.892
## LDL          15.734
## HbA1C        15.447
## AC           15.115
## Cr           13.773
## Circulation.2  8.372
## Circulation.1  7.630
## Sex.Male      6.862

plot(imp_adas2)
```

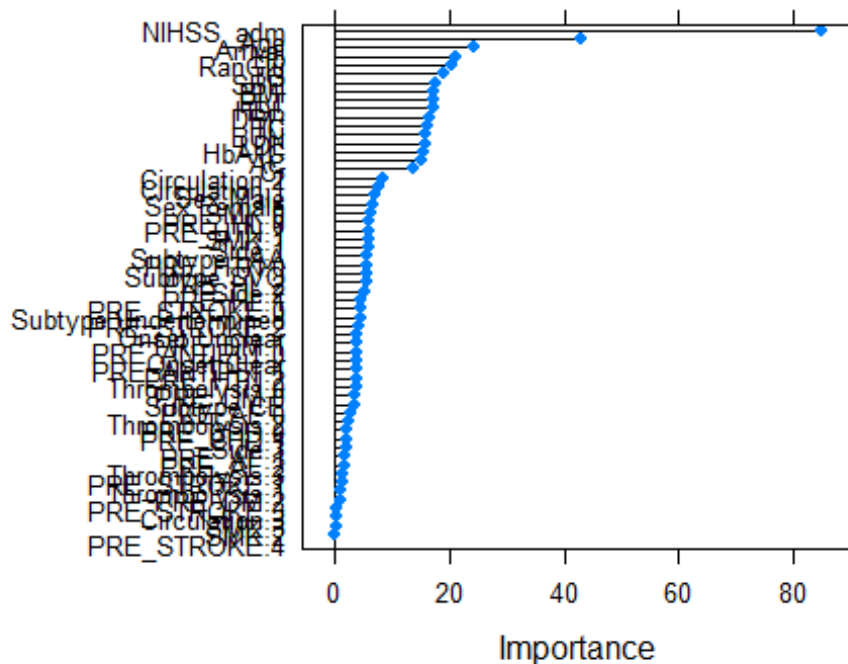

```
set.seed(seed)
rf_fit_adas3 <- train(class~., data = traindata.adas, method = "rf",
                      trControl=ctrl, metric=metric, tuneLength=10,
                      ntree=1500, verbose=FALSE)

rf_fit_adas3

## Random Forest
##
## 1092 samples
## 60 predictor
## 2 classes: 'unfavor', 'favor'
##
## No pre-processing
## Resampling: Cross-Validated (10 fold, repeated 10 times)
## Summary of sample sizes: 982, 984, 983, 983, 983, 982, ...
## Resampling results across tuning parameters:
##
## mtry ROC Sens Spec
## 2 0.9437309 0.8146201 0.8973550
## 8 0.9483870 0.8737110 0.8545388
## 14 0.9438076 0.8854383 0.8310901
## 21 0.9387098 0.8884935 0.8167680
## 27 0.9352906 0.8886494 0.8108106
## 34 0.9313092 0.8899448 0.8091160
## 40 0.9288040 0.8881299 0.8070894
## 47 0.9260637 0.8892175 0.8070755
```

```
##    53    0.9247415  0.8868961  0.8052131
##    60    0.9235761  0.8867240  0.8031586
##
## ROC was used to select the optimal model using the largest value.
## The final value used for the model was mtry = 8.
xadas3 <- evalm(rf_fit_adas3)
```

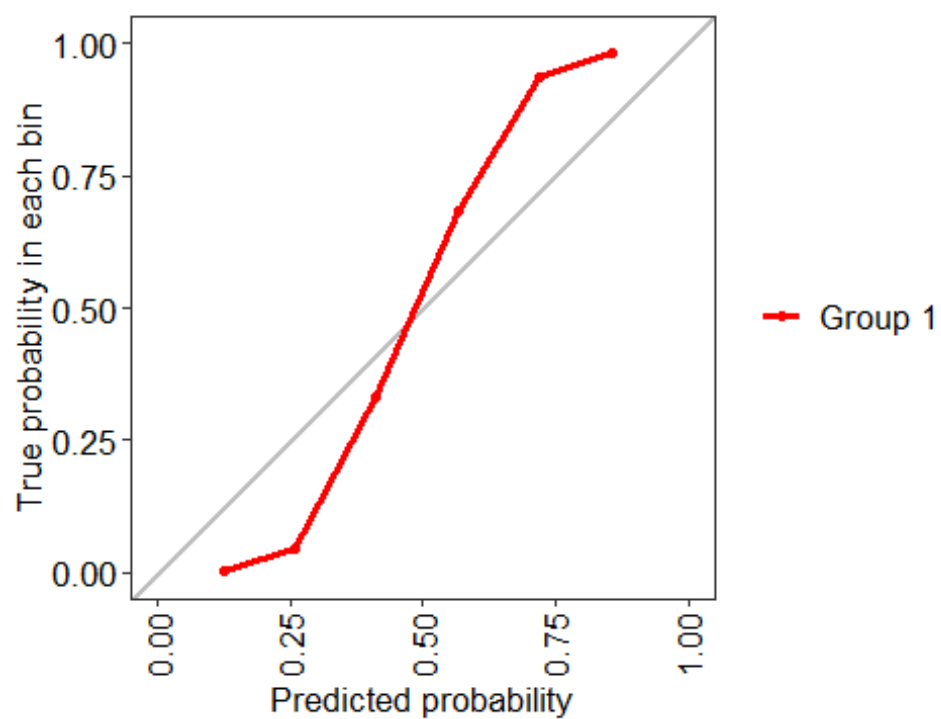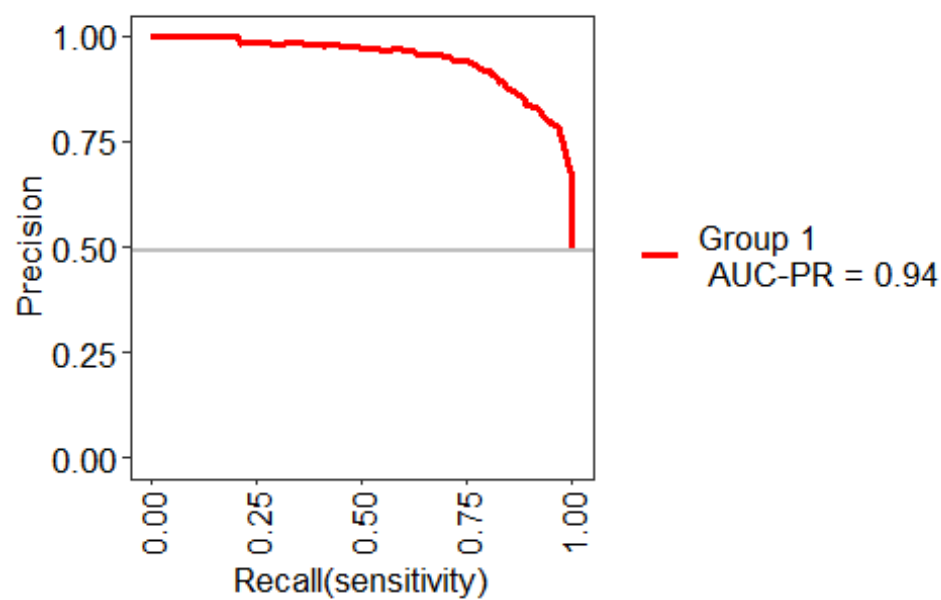

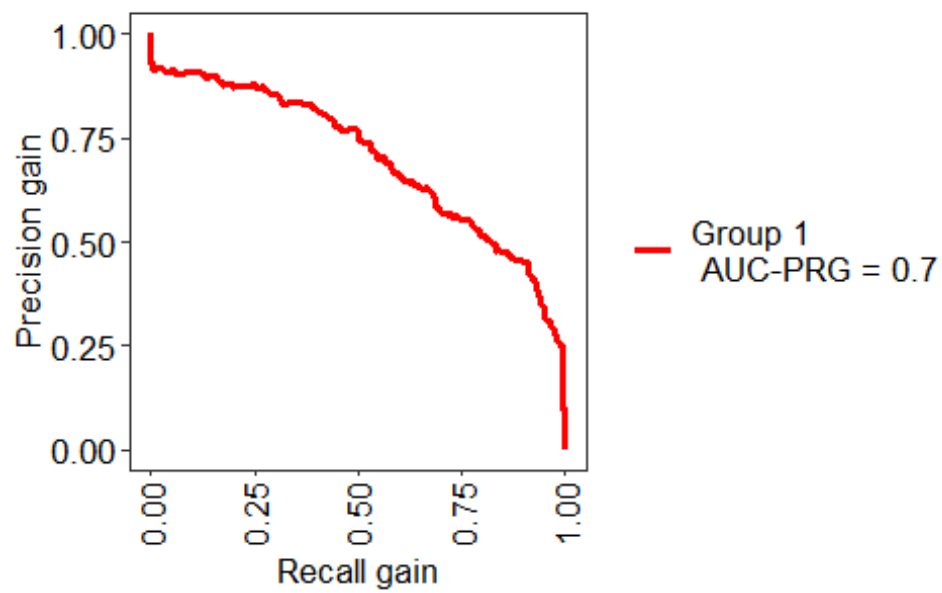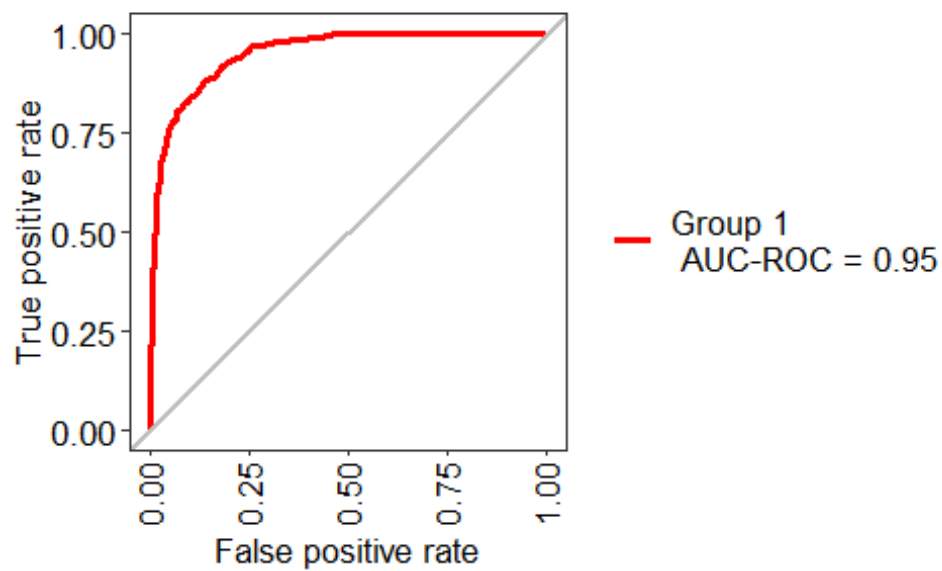

xadas3\$roc



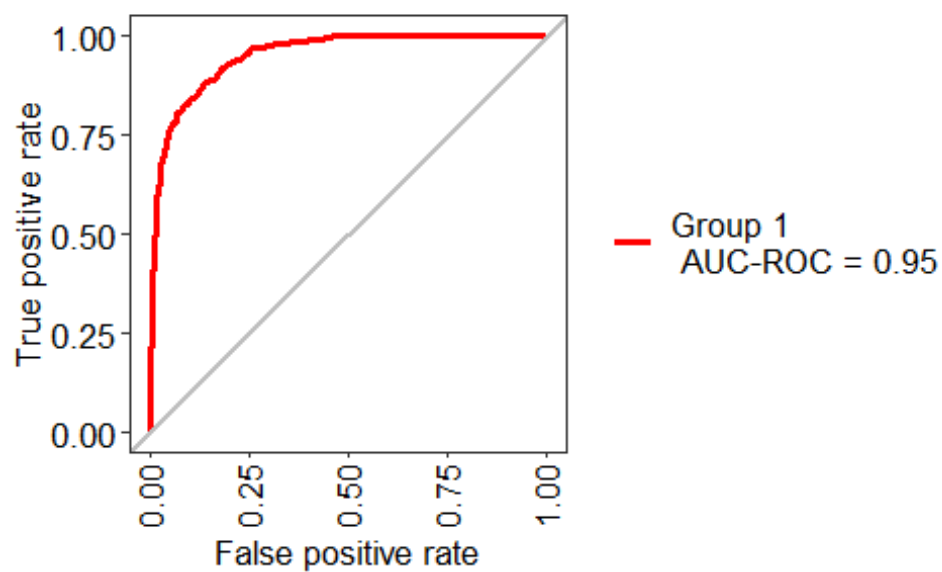

```
xadas3$stdres
```

```
## $`Group 1`
```

```
##          Score      CI
## SENS      0.860 0.83-0.89
## SPEC      0.874 0.84-0.9
## MCC       0.734    <NA>
## Informedness 0.734    <NA>
## PREC      0.868 0.84-0.89
## NPV       0.866 0.84-0.89
## FPR       0.126    <NA>
## F1        0.864    <NA>
## TP        462.000    <NA>
## FP        70.000    <NA>
## TN        485.000    <NA>
## FN        75.000    <NA>
## AUC-ROC    0.950 0.94-0.96
## AUC-PR     0.940    <NA>
## AUC-PRG    0.700    <NA>
```

```
test_pred_rfadas3 <- predict(rf_fit_adas3, newdata = testdata)
confusionMatrix(test_pred_rfadas3, testdata$Outcome)
```

```
## Confusion Matrix and Statistics
```

```
##
```

```
##          Reference
```

```

## Prediction favor unfavor
##   favor    183    42
##   unfavor    25    47
##
##           Accuracy : 0.7744
##           95% CI : (0.7226, 0.8207)
##   No Information Rate : 0.7003
##   P-Value [Acc > NIR] : 0.00266
##
##           Kappa : 0.4315
##
## McNemar's Test P-Value : 0.05062
##
##           Sensitivity : 0.8798
##           Specificity : 0.5281
##           Pos Pred Value : 0.8133
##           Neg Pred Value : 0.6528
##           Prevalence : 0.7003
##           Detection Rate : 0.6162
##           Detection Prevalence : 0.7576
##           Balanced Accuracy : 0.7039
##
##           'Positive' Class : favor
##
test_prob_adas3 <- predict(rf_fit_adas3, newdata = testdata, type="prob")
madas3 = data.frame(test_prob_adas3, testdata$Outcome)
yadas3<-evalm(madas3)

```

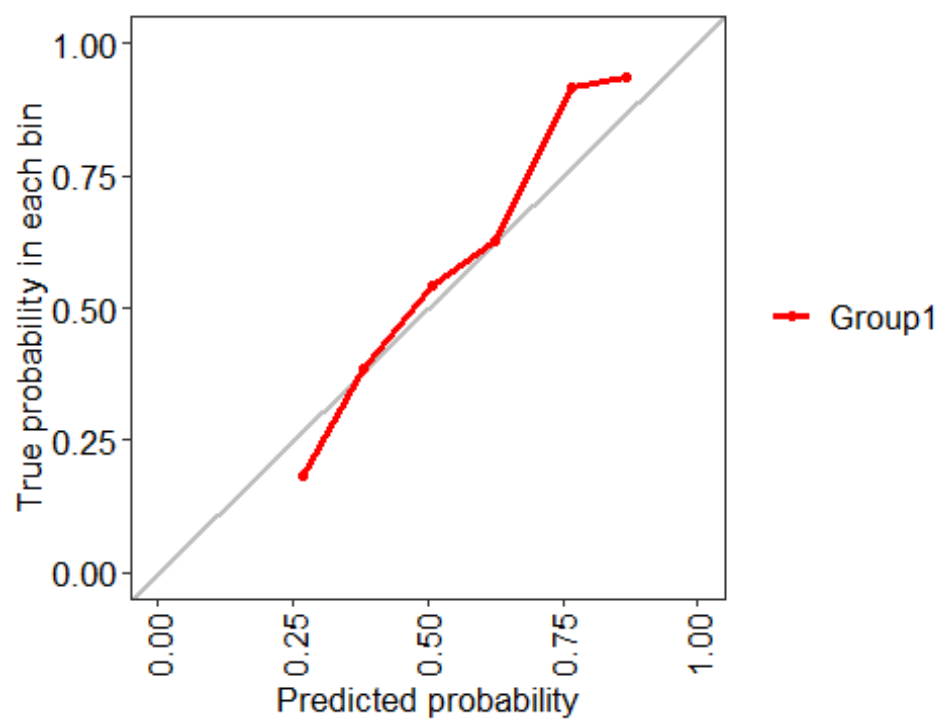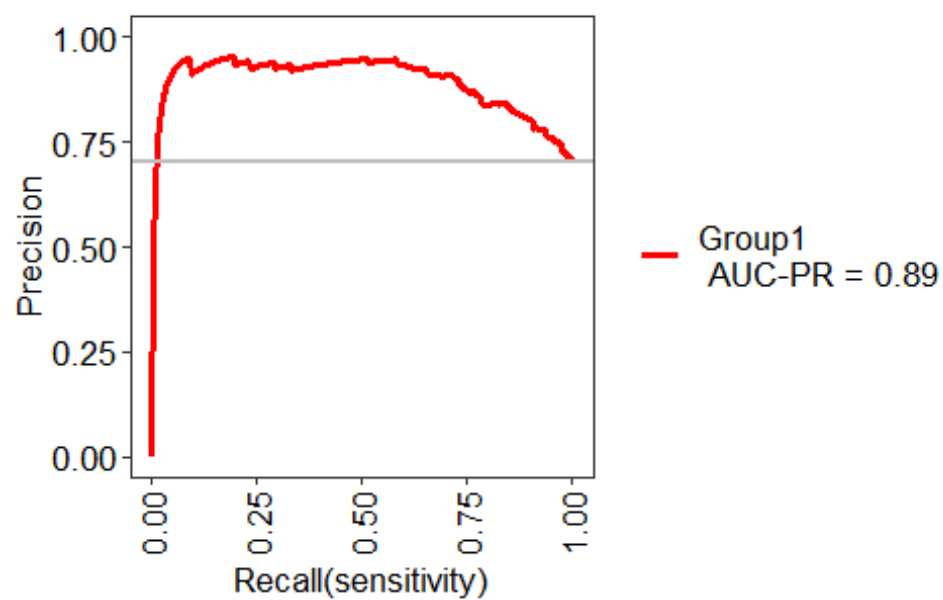

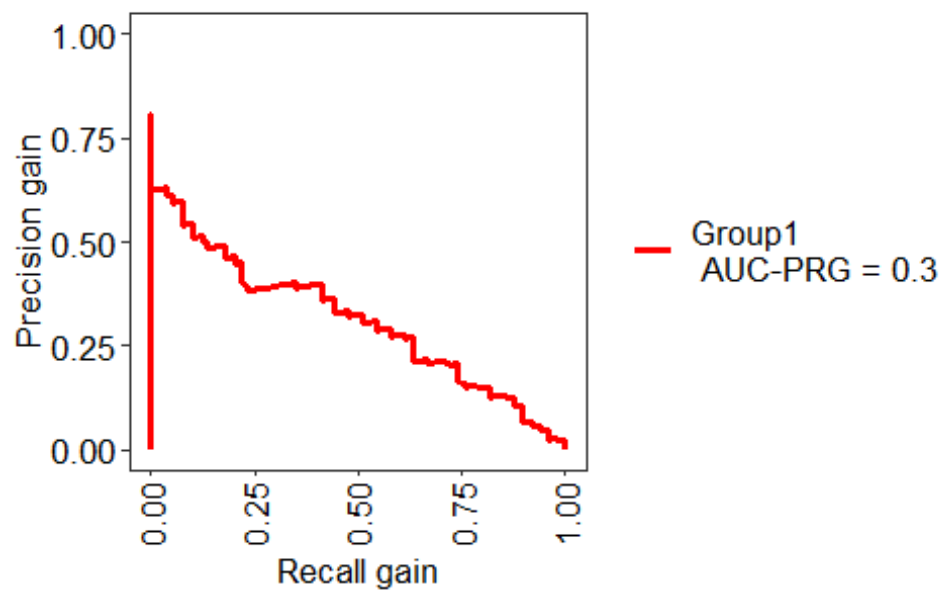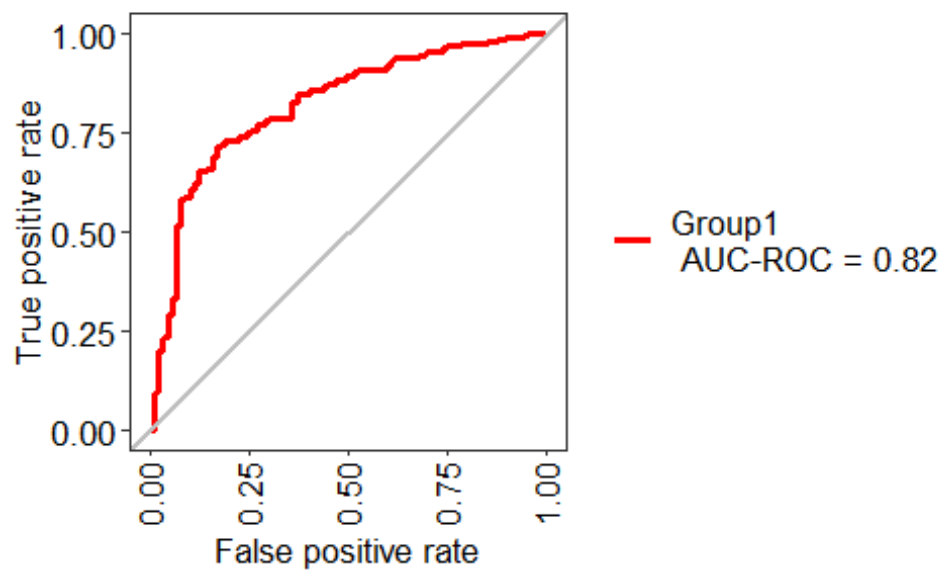

yadas3\$stdres

```
## $Group1
##           Score      CI
## SENS      0.885 0.83-0.92
## SPEC      0.528 0.43-0.63
## MCC       0.443    <NA>
## Informedness 0.413    <NA>
## PREC      0.814 0.76-0.86
## NPV       0.662 0.55-0.76
## FPR       0.472    <NA>
## F1        0.848    <NA>
## TP        184.000    <NA>
## FP        42.000    <NA>
## TN        47.000    <NA>
## FN        24.000    <NA>
## AUC-ROC    0.820 0.77-0.87
## AUC-PR     0.890    <NA>
## AUC-PRG    0.300    <NA>

imp_adas3<-varImp(rf_fit_adas3, scale = FALSE)
imp_adas3

## rf variable importance
##
##   only 20 most important variables shown (out of 60)
##
##           Overall
## NIHSS_adm    84.293
## Age          43.021
## Arrival      24.255
## Hb           21.021
## RanGlu       20.518
## TG           19.182
## BMI          17.344
## PLT          17.298
## SBP          17.096
## HDL          17.020
## DBP          16.209
## TC           16.083
## LDL          16.077
## BUN          16.012
## AC           15.205
## HbA1C        15.159
## Cr           14.000
## Circulation.2  8.376
## Circulation.1  7.673
## Sex.Male      6.848

plot(imp_adas3)
```

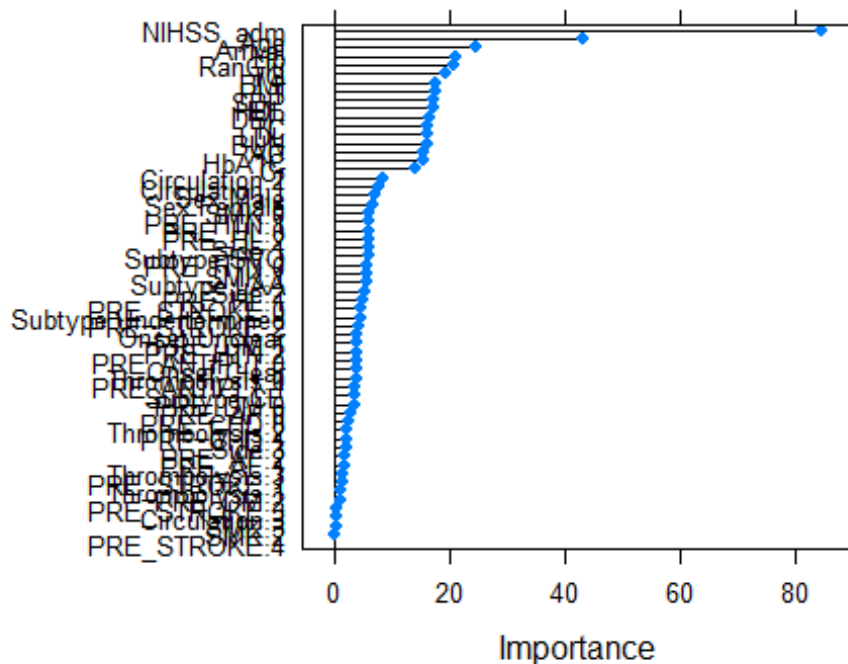

```
set.seed(seed)
xgb_fit_adas <- train(class~., data = traindata.adas, method = "xgbTree",
                      trControl=ctrl, metric=metric, tuneGrid=xgbgrid)
xgb_fit_adas

## eXtreme Gradient Boosting
##
## 1092 samples
##    60 predictor
##    2 classes: 'unfavor', 'favor'
##
## No pre-processing
## Resampling: Cross-Validated (10 fold, repeated 10 times)
## Summary of sample sizes: 982, 984, 983, 983, 983, 982, ...
## Resampling results across tuning parameters:
##
##   eta    max_depth  nrounds  ROC          Sens          Spec
##   0.01    6           500      0.9362709    0.8666753    0.8312474
##   0.01    6           1000     0.9398508    0.8659740    0.8405835
##   0.01    6           1500     0.9404205    0.8672370    0.8413347
##   0.01    8           500      0.9401724    0.8728214    0.8359050
##   0.01    8           1000     0.9424091    0.8692110    0.8413242
##   0.01    8           1500     0.9424251    0.8695649    0.8417016
##   0.10    6           500      0.9359121    0.8598442    0.8357932
##   0.10    6           1000     0.9344892    0.8571526    0.8359539
##   0.10    6           1500     0.9333332    0.8553571    0.8367156
```

```
##    0.10  8          500      0.9375362  0.8627240  0.8388784
##    0.10  8          1000     0.9357828  0.8582305  0.8392662
##    0.10  8          1500     0.9348424  0.8546234  0.8366667
##
## Tuning parameter 'gamma' was held constant at a value of 0
## Tuning
##
## Tuning parameter 'min_child_weight' was held constant at a value of 1
##
## Tuning parameter 'subsample' was held constant at a value of 0.8
## ROC was used to select the optimal model using the largest value.
## The final values used for the model were nrounds = 1500, max_depth = 8, et
a
## = 0.01, gamma = 0, colsample_bytree = 0.6, min_child_weight = 1 and
## subsample = 0.8.
x_xgbadas <- evalm(xgb_fit_adas)
```

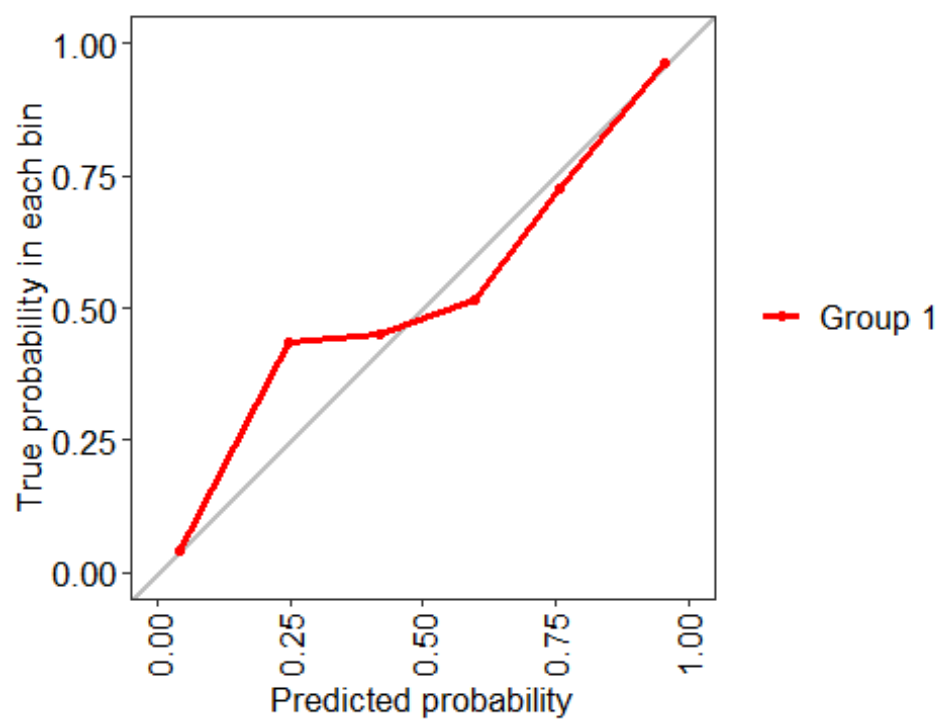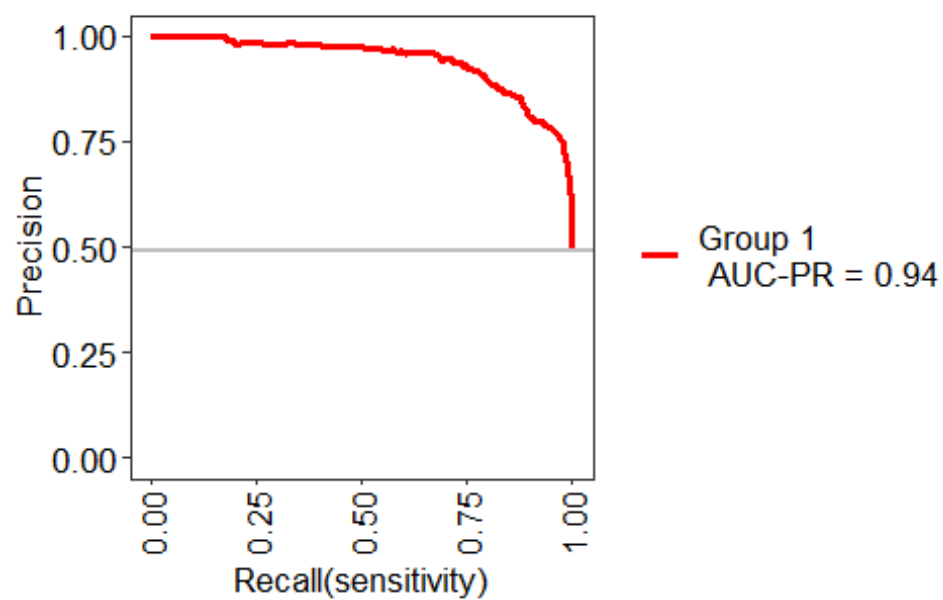



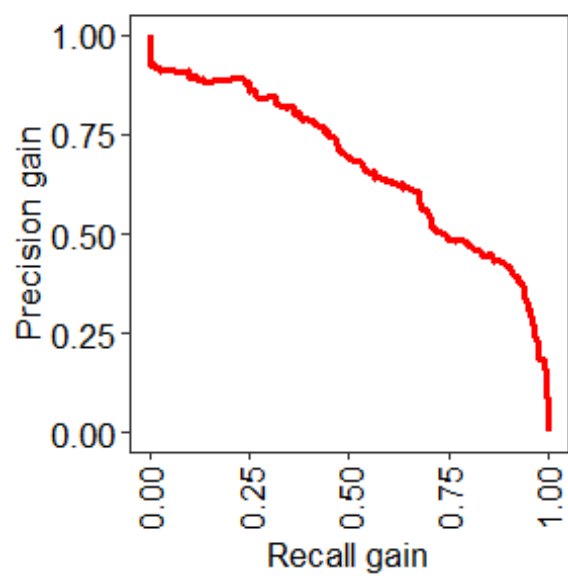

Group 1  
AUC-PRG = 0.67

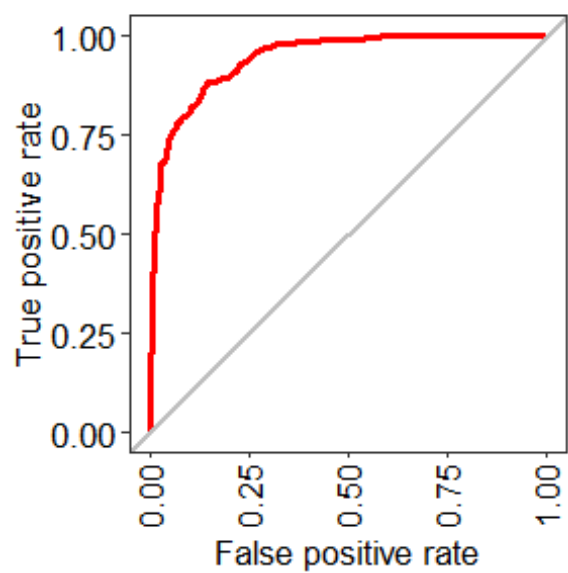

Group 1  
AUC-ROC = 0.94

x\_xgbadas\$stdres

```

## `$`Group 1`
##           Score      CI
## SENS      0.836  0.8-0.87
## SPEC      0.876  0.85-0.9
## MCC       0.713    <NA>
## Informedness 0.712    <NA>
## PREC      0.867  0.83-0.89
## NPV       0.847  0.81-0.87
## FPR       0.124    <NA>
## F1        0.851    <NA>
## TP        449.000    <NA>
## FP        69.000    <NA>
## TN        486.000    <NA>
## FN        88.000    <NA>
## AUC-ROC    0.940  0.93-0.95
## AUC-PR     0.940    <NA>
## AUC-PRG    0.670    <NA>

test_pred_xgbadas <- predict(xgb_fit_adas, newdata = testdata)
confusionMatrix(test_pred_xgbadas, testdata$Outcome)

## Confusion Matrix and Statistics
##
##           Reference
## Prediction favor unfavor
##   favor      173      34
##   unfavor     35      55
##
##           Accuracy : 0.7677
##           95% CI : (0.7154, 0.8145)
##   No Information Rate : 0.7003
##   P-Value [Acc > NIR] : 0.005869
##
##           Kappa : 0.4483
##
##  Mcnemar's Test P-Value : 1.000000
##
##           Sensitivity : 0.8317
##           Specificity : 0.6180
##           Pos Pred Value : 0.8357
##           Neg Pred Value : 0.6111
##           Prevalence : 0.7003
##           Detection Rate : 0.5825
##           Detection Prevalence : 0.6970
##           Balanced Accuracy : 0.7249
##
##           'Positive' Class : favor
##

```

```
test_prob_xgbadas <- predict(xgb_fit_adas, newdata = testdata, type="prob")
mxgbadas = data.frame(test_prob_xgbadas, testdata$Outcome)
yxgbadas<-evalm(mxgbadas)
```

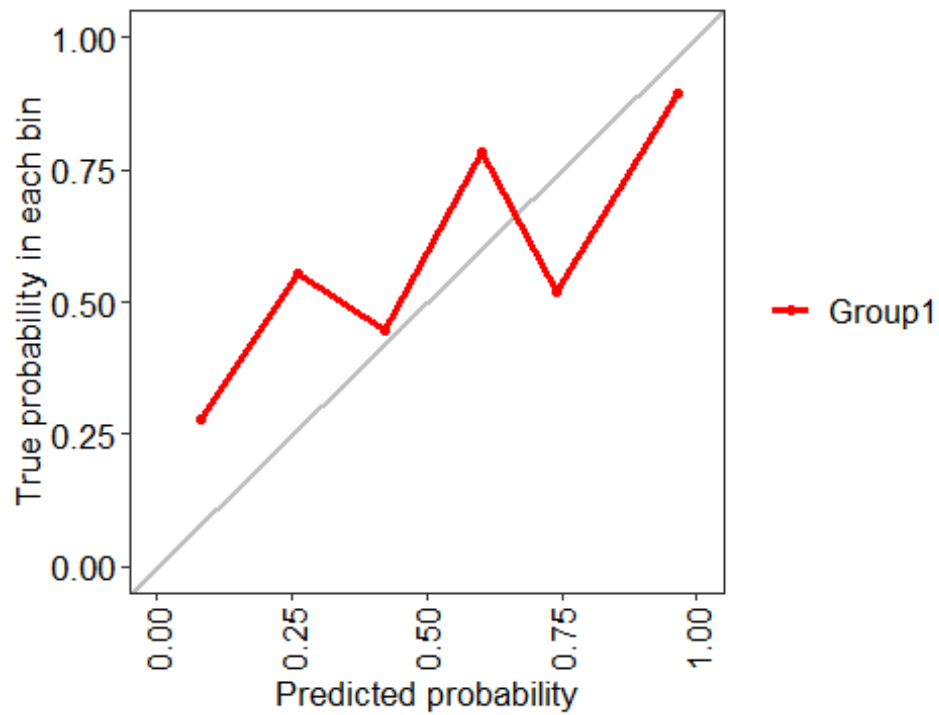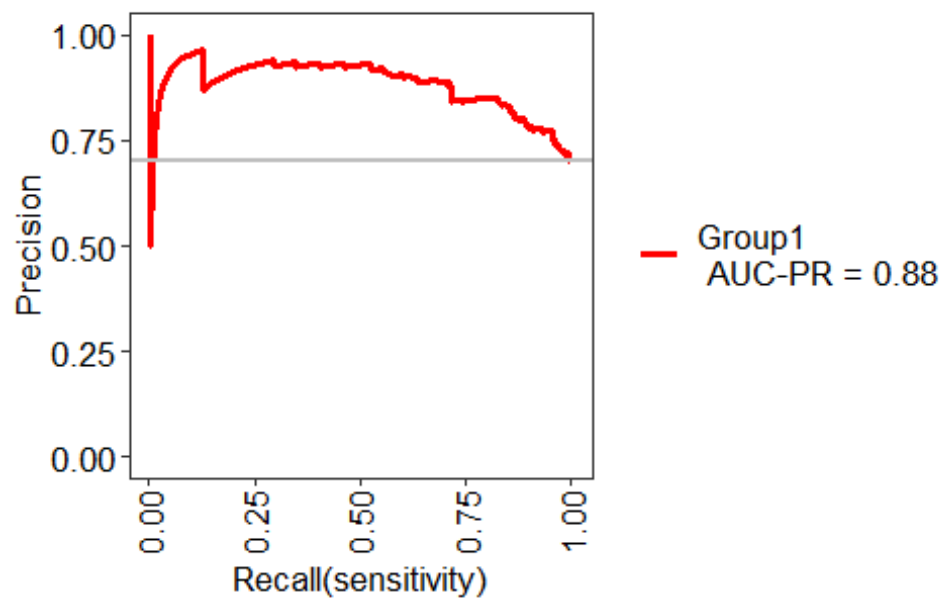

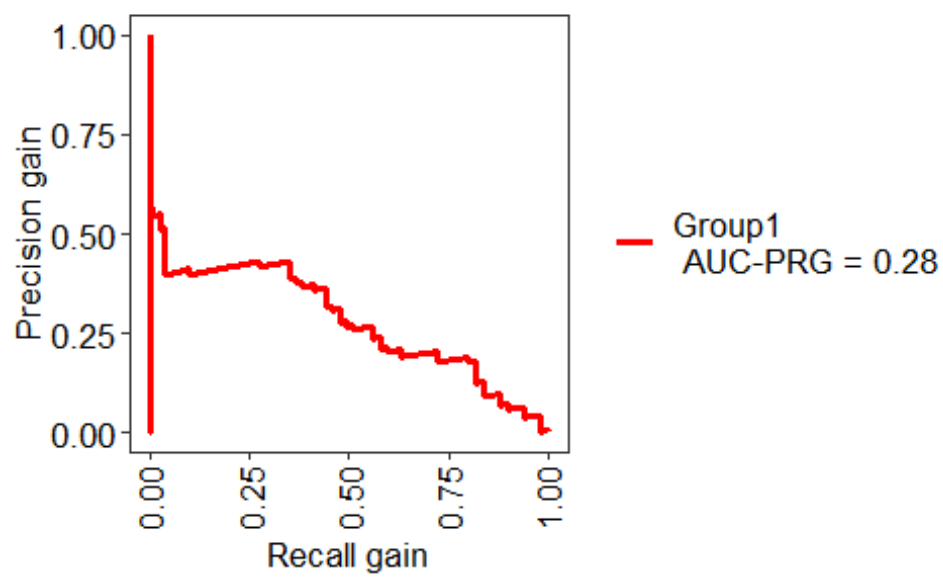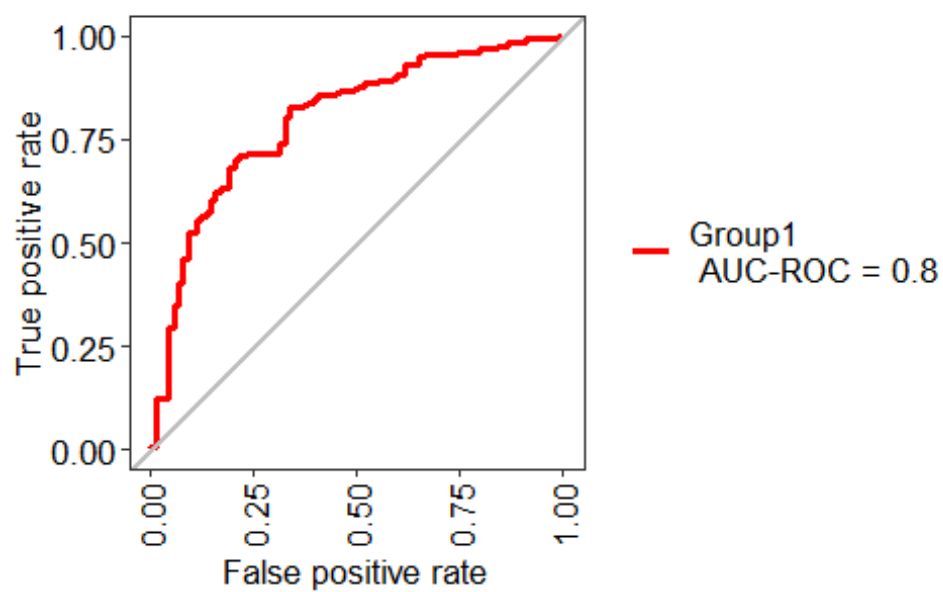

yxgbadas\$stdres

```

## $Group1
##           Score      CI
## SENS      0.832 0.77-0.88
## SPEC      0.618 0.51-0.71
## MCC       0.448      <NA>
## Informedness 0.450      <NA>
## PREC      0.836 0.78-0.88
## NPV       0.611 0.51-0.71
## FPR       0.382      <NA>
## F1        0.834      <NA>
## TP        173.000      <NA>
## FP        34.000      <NA>
## TN        55.000      <NA>
## FN        35.000      <NA>
## AUC-ROC    0.800 0.75-0.85
## AUC-PR     0.880      <NA>
## AUC-PRG    0.280      <NA>

imp_adas<-varImp(xgb_fit_adas, scale = FALSE)
imp_adas

## xgbTree variable importance
##
##   only 20 most important variables shown (out of 60)
##
##           Overall
## NIHSS_adm  0.19861
## Age        0.09764
## Arrival    0.05139
## RanGlu     0.04151
## PLT        0.03591
## SBP        0.03586
## Hb         0.03506
## DBP        0.03330
## TG         0.03266
## BMI        0.03204
## LDL        0.02924
## HDL        0.02866
## TC         0.02770
## BUN        0.02665
## Cr         0.02543
## HbA1C      0.02504
## AC         0.02124
## Side.1     0.01551
## Circulation.1 0.01490
## Sex.Female 0.01450

plot(imp_adas)

```

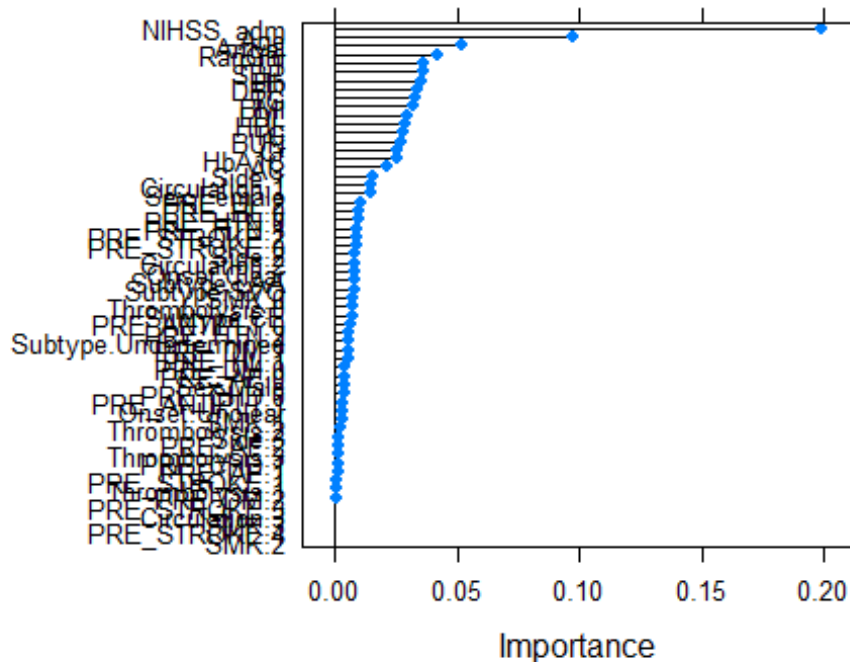

```
set.seed(seed)
svm_fit_adas <- train(class~., data = traindata.adas, method = "svmRadial",
                      trControl=ctrl, metric=metric, tuneLength = 10)
svm_fit_adas

## Support Vector Machines with Radial Basis Function Kernel
##
## 1092 samples
##    60 predictor
##    2 classes: 'unfavor', 'favor'
##
## No pre-processing
## Resampling: Cross-Validated (10 fold, repeated 10 times)
## Summary of sample sizes: 982, 984, 983, 983, 983, 982, ...
## Resampling results across tuning parameters:
##
##    C          ROC          Sens          Spec
##    0.25  0.8200145  0.7463799  0.7335604
##    0.50  0.8498604  0.7922922  0.7594340
##    1.00  0.8801814  0.8225519  0.7914605
##    2.00  0.9075508  0.8612987  0.8149266
##    4.00  0.9300968  0.8883182  0.8368728
##    8.00  0.9461839  0.9147857  0.8523096
##   16.00  0.9491871  0.9247078  0.8551572
##   32.00  0.9490927  0.9229091  0.8515968
##   64.00  0.9491760  0.9243539  0.8513941
```

```
## 128.00 0.9491760 0.9243474 0.8493501
##
## Tuning parameter 'sigma' was held constant at a value of 0.03255705
## ROC was used to select the optimal model using the largest value.
## The final values used for the model were sigma = 0.03255705 and C = 16.
x_svmadas <- evalm(svm_fit_adas)
```

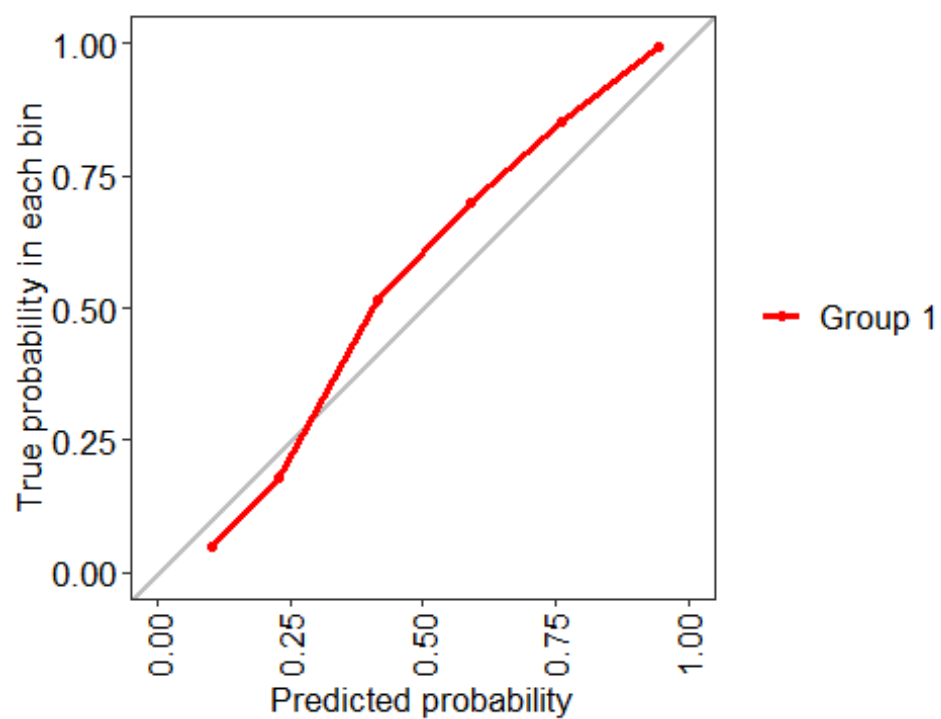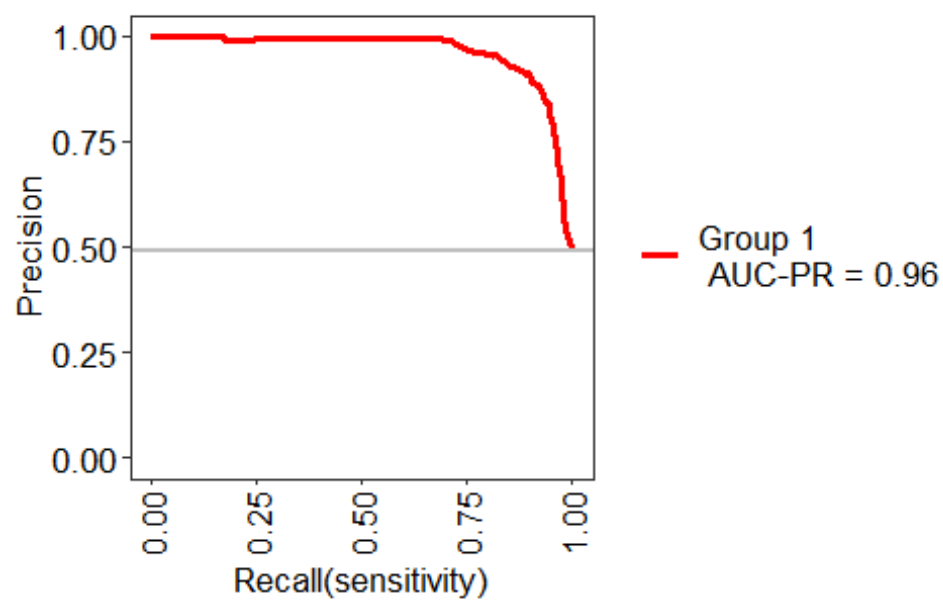



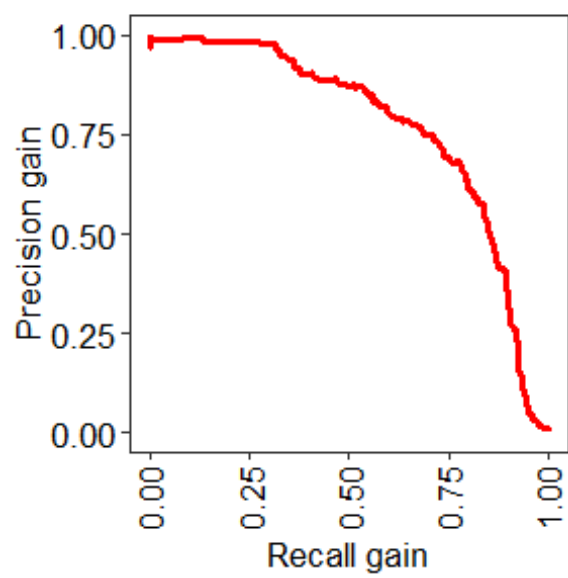

— Group 1  
AUC-PRG = 0.77

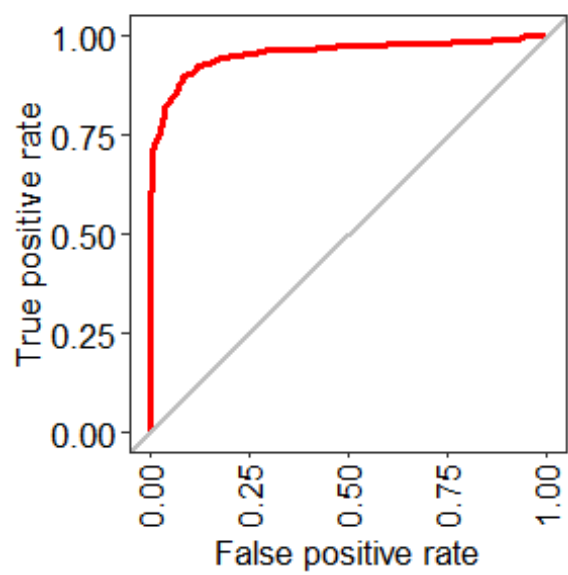

— Group 1  
AUC-ROC = 0.95

```
x_svmadas$stdres
```

```

## `$`Group 1`
##           Score      CI
## SENS      0.860 0.83-0.89
## SPEC      0.933 0.91-0.95
## MCC       0.797      <NA>
## Informedness 0.794      <NA>
## PREC      0.926 0.9-0.95
## NPV       0.874 0.84-0.9
## FPR       0.067      <NA>
## F1        0.892      <NA>
## TP        462.000      <NA>
## FP        37.000      <NA>
## TN        518.000      <NA>
## FN        75.000      <NA>
## AUC-ROC    0.950 0.94-0.96
## AUC-PR     0.960      <NA>
## AUC-PRG    0.770      <NA>

test_pred_svmadas <- predict(svm_fit_adas, newdata = testdata)
confusionMatrix (test_pred_svmadas, testdata$Outcome)

## Confusion Matrix and Statistics
##
##           Reference
## Prediction favor unfavor
##   favor      183      56
##   unfavor     25      33
##
##           Accuracy : 0.7273
##           95% CI : (0.6728, 0.7771)
##   No Information Rate : 0.7003
##   P-Value [Acc > NIR] : 0.1712592
##
##           Kappa : 0.2783
##
##  Mcnemar's Test P-Value : 0.0008581
##
##           Sensitivity : 0.8798
##           Specificity : 0.3708
##           Pos Pred Value : 0.7657
##           Neg Pred Value : 0.5690
##           Prevalence : 0.7003
##           Detection Rate : 0.6162
##           Detection Prevalence : 0.8047
##           Balanced Accuracy : 0.6253
##
##           'Positive' Class : favor
##

```

```
test_prob_svmadas <- predict(svm_fit_adas, newdata = testdata, type="prob")
msvmadas = data.frame(test_prob_svmadas, testdata$Outcome)
ysvmadas<-evalm(msvmadas)
```

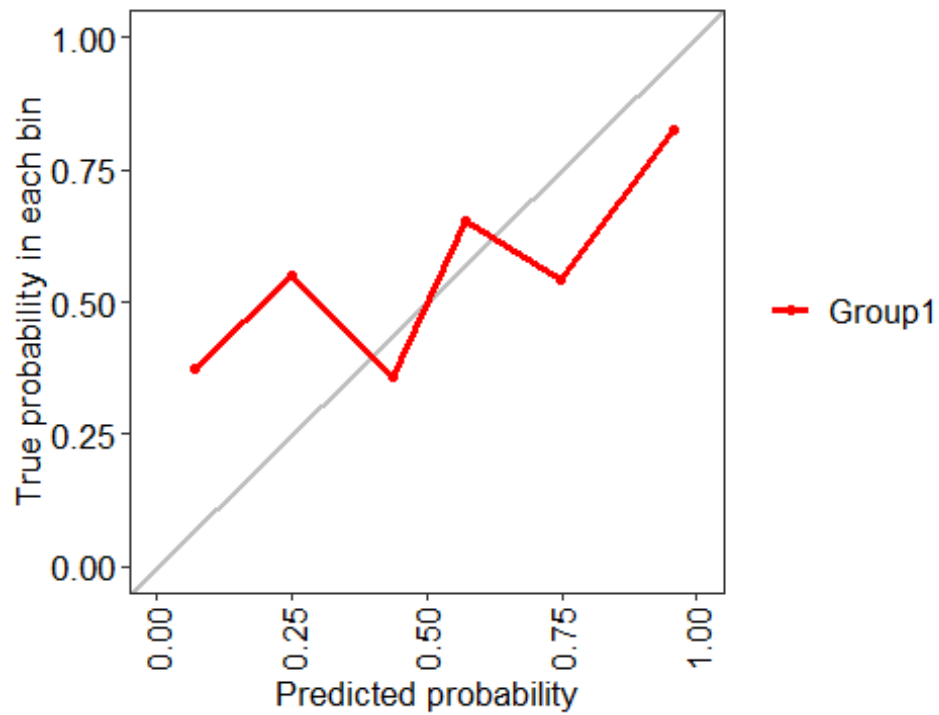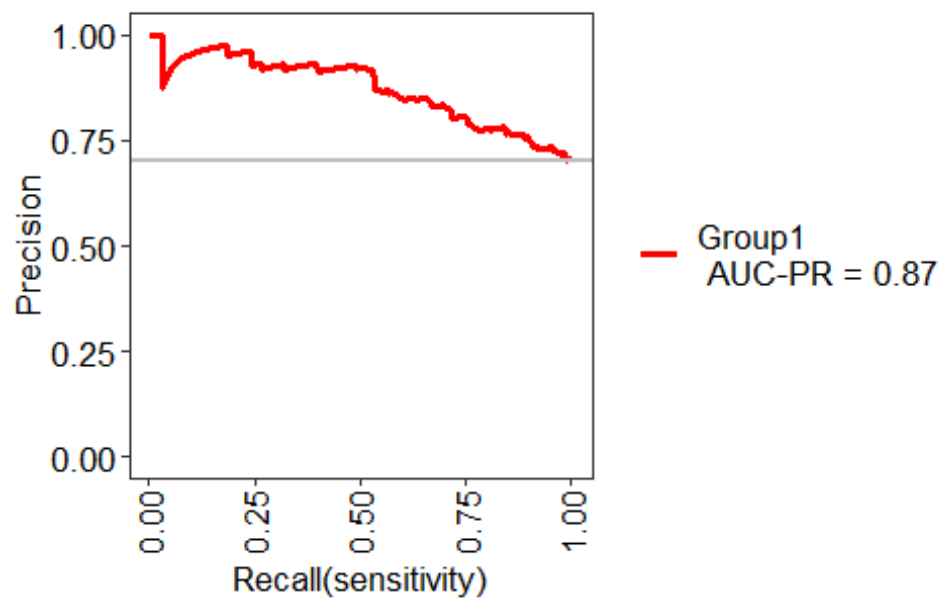

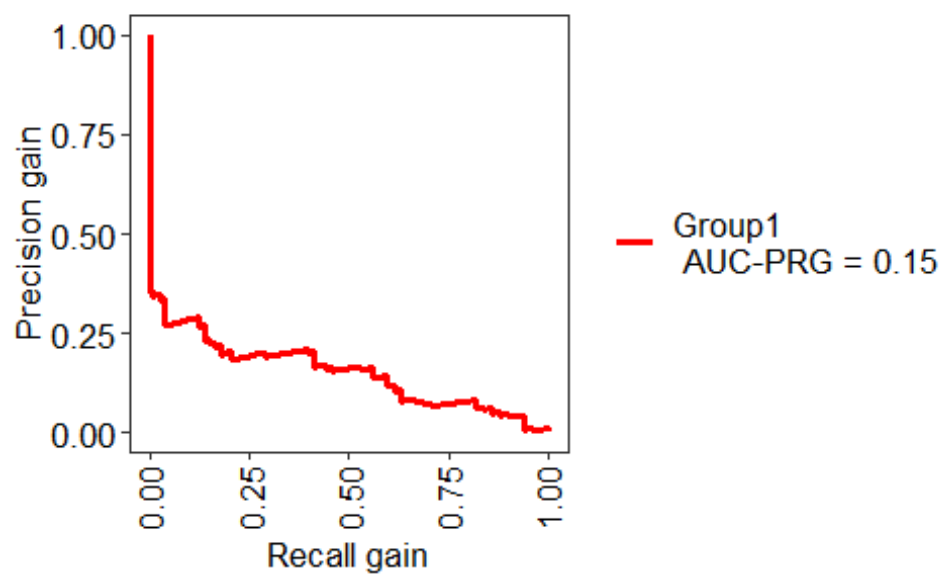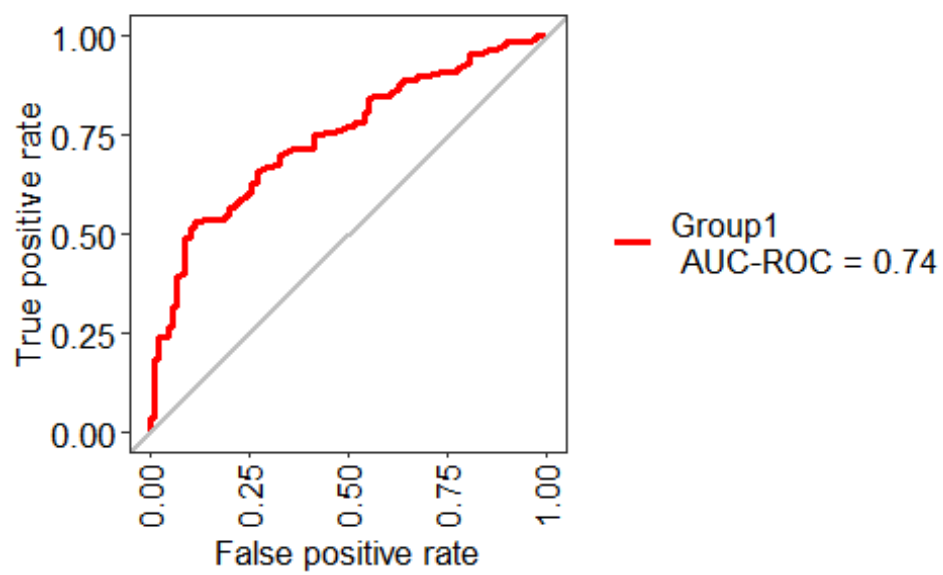

ysvmadas\$stdres

```

## $Group1
##           Score      CI
## SENS      0.880 0.83-0.92
## SPEC      0.371 0.28-0.47
## MCC       0.290      <NA>
## Informedness 0.251      <NA>
## PREC      0.766 0.71-0.81
## NPV       0.569 0.44-0.69
## FPR       0.629      <NA>
## F1        0.819      <NA>
## TP        183.000      <NA>
## FP        56.000      <NA>
## TN        33.000      <NA>
## FN        25.000      <NA>
## AUC-ROC    0.740 0.68-0.8
## AUC-PR     0.870      <NA>
## AUC-PRG    0.150      <NA>

set.seed(seed)
knn_fit_adas <- train(class~., data = traindata.adas, method = "knn",
                      trControl=ctrl, metric=metric, tuneLength = 50)
knn_fit_adas

## k-Nearest Neighbors
##
## 1092 samples
## 60 predictor
## 2 classes: 'unfavor', 'favor'
##
## No pre-processing
## Resampling: Cross-Validated (10 fold, repeated 10 times)
## Summary of sample sizes: 982, 984, 983, 983, 983, 982, ...
## Resampling results across tuning parameters:
##
##  k    ROC      Sens      Spec
##  5  0.7960040  0.9495325  0.4555765
##  7  0.7764053  0.9408669  0.4270231
##  9  0.7724186  0.9370812  0.4044829
## 11  0.7631439  0.9387078  0.3838190
## 13  0.7602684  0.9338701  0.3733857
## 15  0.7547646  0.9265032  0.3660971
## 17  0.7458261  0.9171396  0.3611076
## 19  0.7435190  0.9140942  0.3551328
## 21  0.7439380  0.9151721  0.3532739
## 23  0.7421574  0.9155325  0.3462089
## 25  0.7405973  0.9207500  0.3400559
## 27  0.7406208  0.9227338  0.3313208
## 29  0.7425156  0.9210974  0.3275821
## 31  0.7410642  0.9228896  0.3255311

```

```
## 33 0.7425580 0.9234351 0.3234976
## 35 0.7413471 0.9196494 0.3190252
## 37 0.7408390 0.9198214 0.3151188
## 39 0.7385125 0.9179968 0.3136198
## 41 0.7383945 0.9192695 0.3048532
## 43 0.7379461 0.9185487 0.3013627
## 45 0.7361045 0.9185390 0.2931586
## 47 0.7352218 0.9207143 0.2894584
## 49 0.7354411 0.9239610 0.2874004
## 51 0.7346885 0.9259383 0.2883019
## 53 0.7341101 0.9248442 0.2858980
## 55 0.7340553 0.9241364 0.2844130
## 57 0.7340744 0.9268312 0.2795388
## 59 0.7353202 0.9281136 0.2801083
## 61 0.7347136 0.9277370 0.2787806
## 63 0.7332101 0.9277208 0.2754263
## 65 0.7310903 0.9257500 0.2743117
## 67 0.7298167 0.9282597 0.2733718
## 69 0.7298059 0.9280844 0.2741125
## 71 0.7295168 0.9275227 0.2770894
## 73 0.7282963 0.9259188 0.2758001
## 75 0.7274917 0.9206883 0.2744934
## 77 0.7261828 0.9197857 0.2739308
## 79 0.7254983 0.9161753 0.2748637
## 81 0.7248028 0.9125877 0.2744864
## 83 0.7242829 0.9098831 0.2745038
## 85 0.7233342 0.9068117 0.2776415
## 87 0.7217892 0.9046558 0.2811845
## 89 0.7200454 0.9024805 0.2819182
## 91 0.7183580 0.9019513 0.2845353
## 93 0.7168714 0.9026526 0.2884416
## 95 0.7159436 0.9031981 0.2901188
## 97 0.7156314 0.9021169 0.2923550
## 99 0.7152049 0.9030325 0.2930887
## 101 0.7144363 0.9028571 0.2960727
## 103 0.7157263 0.9017825 0.2960622
```

```
##
```

```
## ROC was used to select the optimal model using the largest value.
```

```
## The final value used for the model was k = 5.
```

```
x_knnadas <- evalm(knn_fit_adas)
```

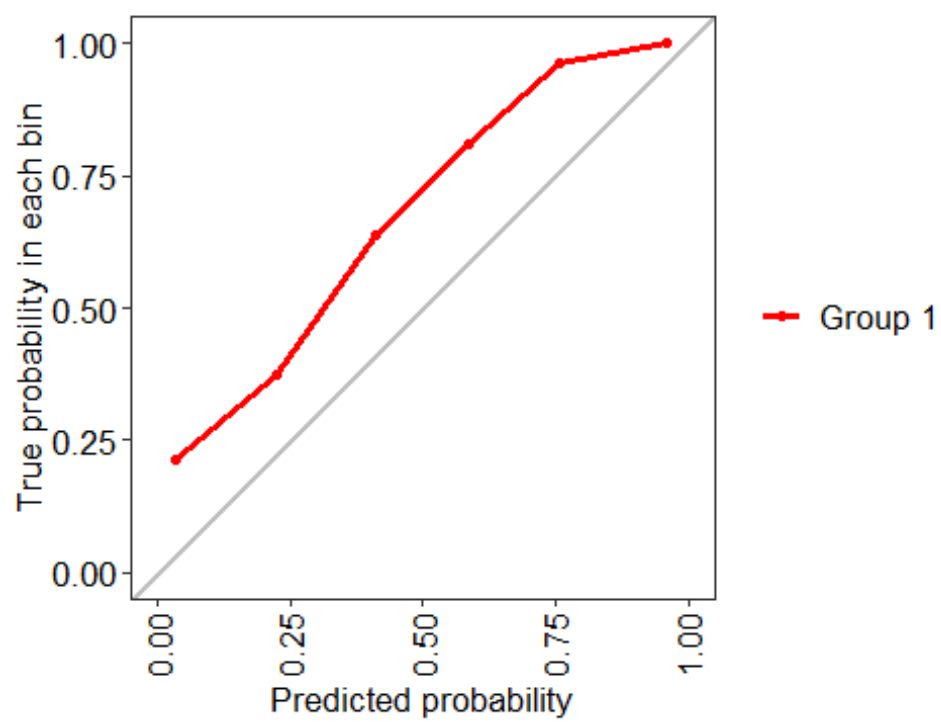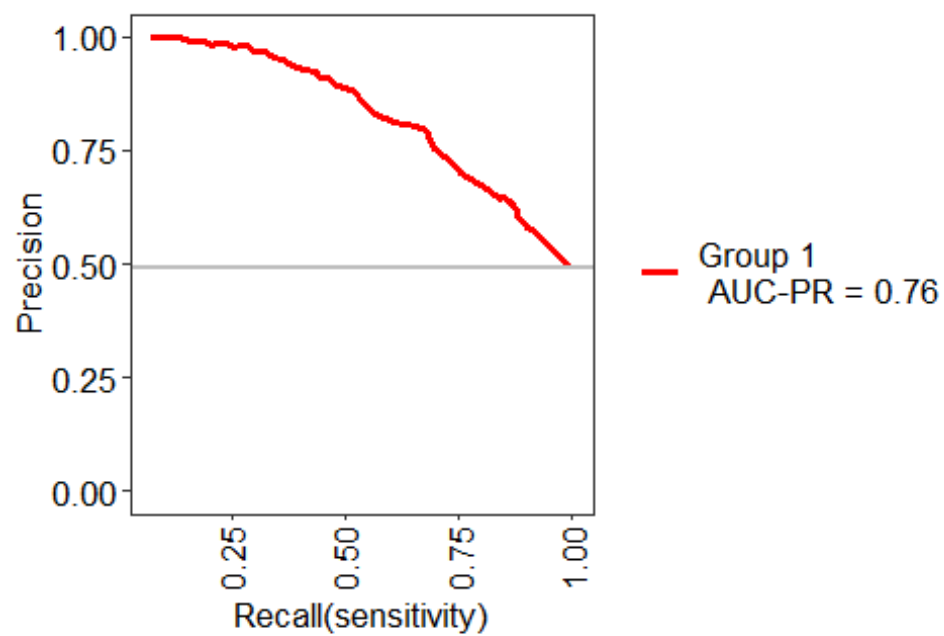

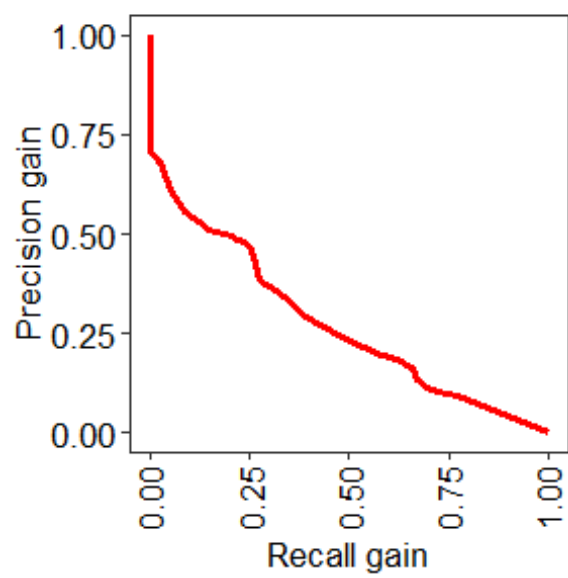

Group 1  
AUC-PRG = 0.27

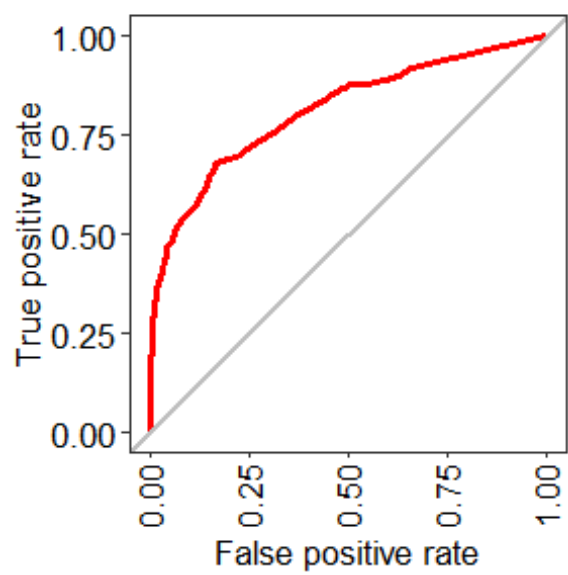

Group 1  
AUC-ROC = 0.81

x\_knnadas\$stdres



```

## `$`Group 1`
##           Score      CI
## SENS      0.462  0.42-0.5
## SPEC      0.957  0.94-0.97
## MCC       0.484    <NA>
## Informedness 0.419    <NA>
## PREC      0.912  0.87-0.94
## NPV       0.648  0.61-0.68
## FPR       0.043    <NA>
## F1        0.613    <NA>
## TP        248.000    <NA>
## FP        24.000    <NA>
## TN        531.000    <NA>
## FN        289.000    <NA>
## AUC-ROC    0.810  0.78-0.84
## AUC-PR     0.760    <NA>
## AUC-PRG    0.270    <NA>

test_pred_knnadas <- predict(knn_fit_adas, newdata = testdata)
confusionMatrix(test_pred_knnadas, testdata$Outcome)

## Confusion Matrix and Statistics
##
##           Reference
## Prediction favor unfavor
##   favor      100      36
##   unfavor    108      53
##
##           Accuracy : 0.5152
##           95% CI : (0.4567, 0.5733)
##   No Information Rate : 0.7003
##   P-Value [Acc > NIR] : 1
##
##           Kappa : 0.0619
##
## Mcnemar's Test P-Value : 3.285e-09
##
##           Sensitivity : 0.4808
##           Specificity : 0.5955
##           Pos Pred Value : 0.7353
##           Neg Pred Value : 0.3292
##           Prevalence : 0.7003
##           Detection Rate : 0.3367
##           Detection Prevalence : 0.4579
##           Balanced Accuracy : 0.5381
##
##           'Positive' Class : favor
##

```

```
test_prob_knnadas <- predict(knn_fit_adas, newdata = testdata, type="prob")
mknnadas = data.frame(test_prob_knnadas, testdata$Outcome)
yknnadas<-evalm(mknnadas)
```

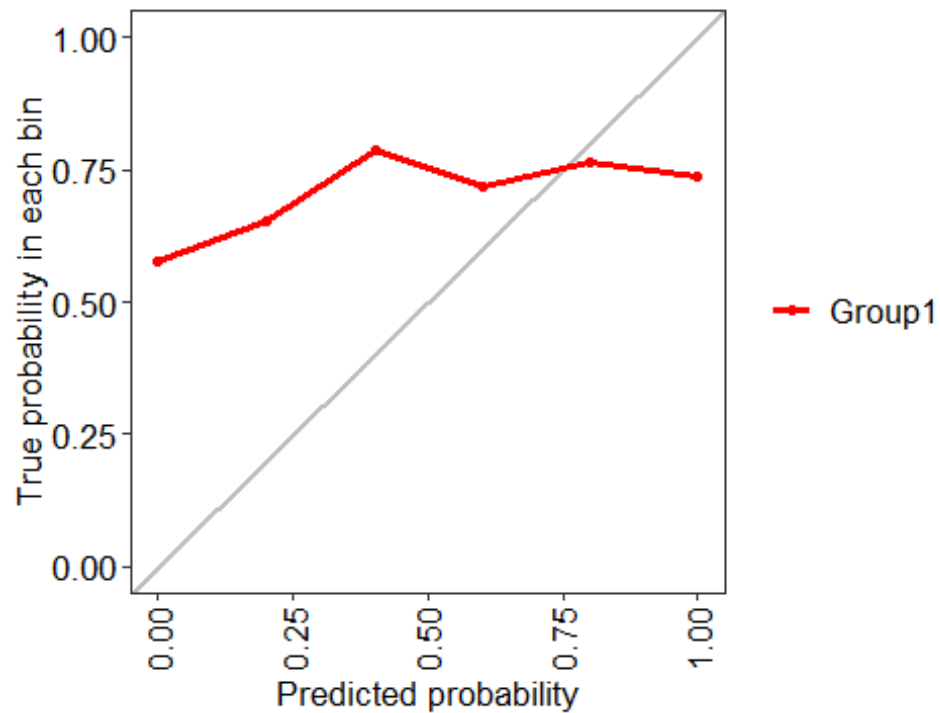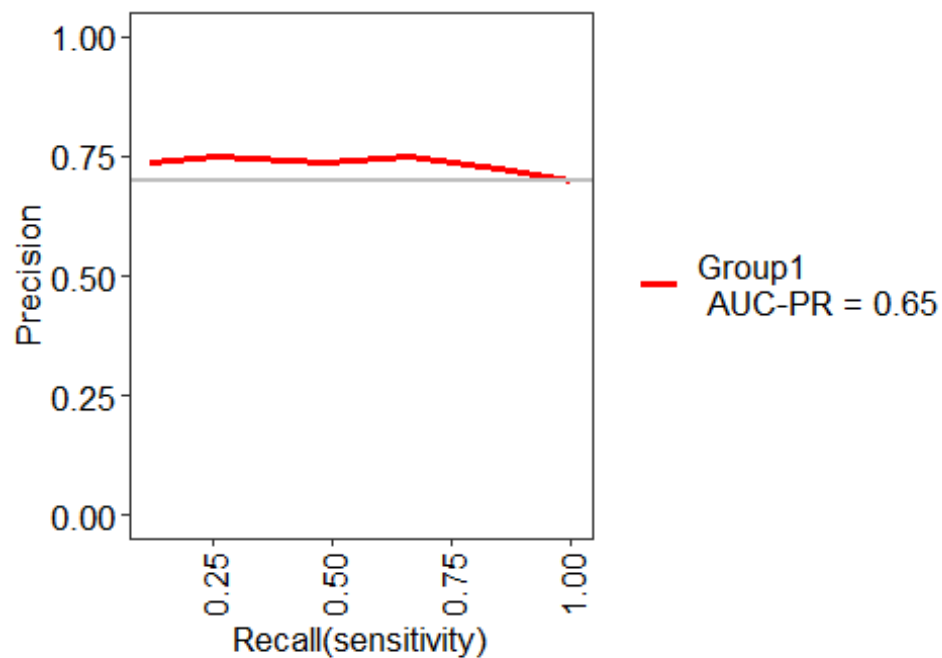

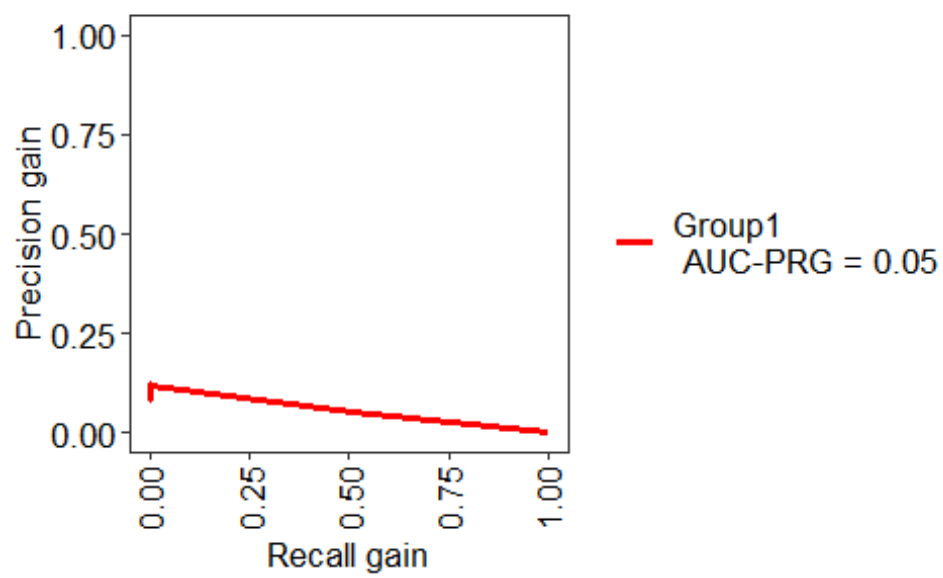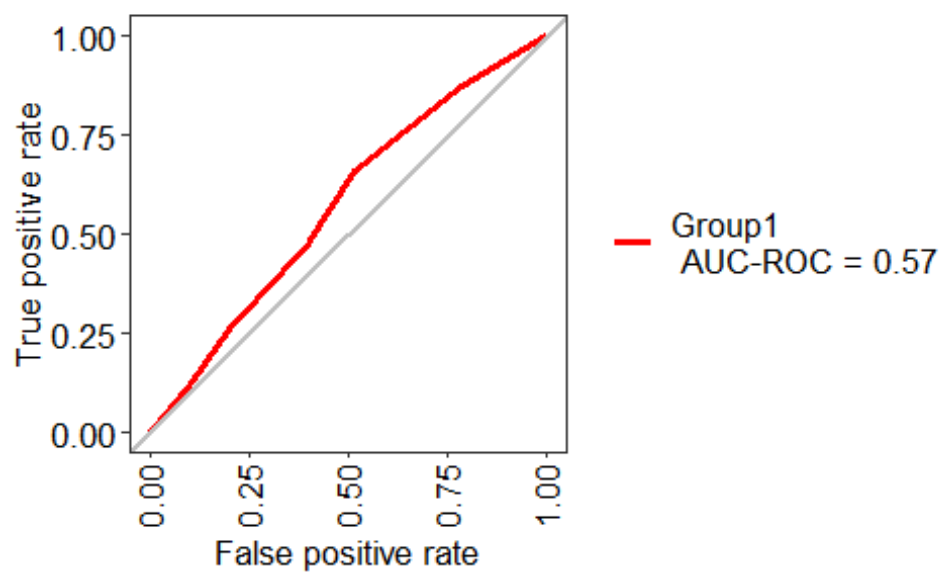

yknadas\$stdres

```

## $Group1
##           Score      CI
## SENS      0.486 0.42-0.55
## SPEC      0.596 0.49-0.69
## MCC       0.075    <NA>
## Informedness 0.081    <NA>
## PREC      0.737 0.66-0.8
## NPV       0.331 0.26-0.41
## FPR       0.404    <NA>
## F1        0.586    <NA>
## TP        101.000    <NA>
## FP        36.000    <NA>
## TN        53.000    <NA>
## FN        107.000    <NA>
## AUC-ROC    0.570 0.5-0.64
## AUC-PR     0.650    <NA>
## AUC-PRG    0.050    <NA>

set.seed(seed)
lr_fit_adas<-train(class~., data = traindata.adas, method = "regLogistic",
                   trControl=ctrl, metric=metric, tuneLength=5, verbose=FALS
E)
lr_fit_adas

## Regularized Logistic Regression
##
## 1092 samples
## 60 predictor
## 2 classes: 'unfavor', 'favor'
##
## No pre-processing
## Resampling: Cross-Validated (10 fold, repeated 10 times)
## Summary of sample sizes: 982, 984, 983, 983, 983, 982, ...
## Resampling results across tuning parameters:
##
## cost loss      epsilon ROC      Sens      Spec
## 0.25 L1        1e-04  0.7854758 0.7098182 0.7272082
## 0.25 L1        1e-03  0.7855296 0.7101786 0.7272082
## 0.25 L1        1e-02  0.7854295 0.7091006 0.7270231
## 0.25 L1        1e-01  0.7848793 0.7040390 0.7242243
## 0.25 L1        1e+00  0.7575081 0.6716299 0.7051188
## 0.25 L2_dual   1e-04  0.7851466 0.7335747 0.7247973
## 0.25 L2_dual   1e-03  0.7851500 0.7335747 0.7247973
## 0.25 L2_dual   1e-02  0.7851402 0.7335747 0.7247973
## 0.25 L2_dual   1e-01  0.7851266 0.7337532 0.7247939
## 0.25 L2_dual   1e+00  0.7849793 0.7326656 0.7238539
## 0.25 L2_primal 1e-04  0.7851400 0.7335747 0.7247973
## 0.25 L2_primal 1e-03  0.7851735 0.7333929 0.7247973
## 0.25 L2_primal 1e-02  0.7848383 0.7339351 0.7247939

```

|    |      |           |       |           |           |           |
|----|------|-----------|-------|-----------|-----------|-----------|
| ## | 0.25 | L2_primal | 1e-01 | 0.7812245 | 0.7304935 | 0.7232984 |
| ## | 0.25 | L2_primal | 1e+00 | 0.7658040 | 0.7023961 | 0.7150978 |
| ## | 0.50 | L1        | 1e-04 | 0.7844653 | 0.7205649 | 0.7272257 |
| ## | 0.50 | L1        | 1e-03 | 0.7843842 | 0.7205649 | 0.7272257 |
| ## | 0.50 | L1        | 1e-02 | 0.7844096 | 0.7203961 | 0.7264885 |
| ## | 0.50 | L1        | 1e-01 | 0.7844620 | 0.7162760 | 0.7257023 |
| ## | 0.50 | L1        | 1e+00 | 0.7468333 | 0.6652338 | 0.6870999 |
| ## | 0.50 | L2_dual   | 1e-04 | 0.7856116 | 0.7322955 | 0.7236758 |
| ## | 0.50 | L2_dual   | 1e-03 | 0.7856116 | 0.7322955 | 0.7236758 |
| ## | 0.50 | L2_dual   | 1e-02 | 0.7856116 | 0.7322955 | 0.7236758 |
| ## | 0.50 | L2_dual   | 1e-01 | 0.7856358 | 0.7321136 | 0.7234871 |
| ## | 0.50 | L2_dual   | 1e+00 | 0.7851581 | 0.7319156 | 0.7240566 |
| ## | 0.50 | L2_primal | 1e-04 | 0.7856183 | 0.7322955 | 0.7236758 |
| ## | 0.50 | L2_primal | 1e-03 | 0.7856083 | 0.7324740 | 0.7236758 |
| ## | 0.50 | L2_primal | 1e-02 | 0.7854701 | 0.7310357 | 0.7229315 |
| ## | 0.50 | L2_primal | 1e-01 | 0.7838607 | 0.7292078 | 0.7232879 |
| ## | 0.50 | L2_primal | 1e+00 | 0.7654325 | 0.7032792 | 0.7160412 |
| ## | 1.00 | L1        | 1e-04 | 0.7858442 | 0.7270552 | 0.7255521 |
| ## | 1.00 | L1        | 1e-03 | 0.7857668 | 0.7268766 | 0.7248078 |
| ## | 1.00 | L1        | 1e-02 | 0.7846400 | 0.7268831 | 0.7235115 |
| ## | 1.00 | L1        | 1e-01 | 0.7832544 | 0.7205779 | 0.7234941 |
| ## | 1.00 | L1        | 1e+00 | 0.7447113 | 0.6697825 | 0.6869497 |
| ## | 1.00 | L2_dual   | 1e-04 | 0.7856508 | 0.7274091 | 0.7223725 |
| ## | 1.00 | L2_dual   | 1e-03 | 0.7856541 | 0.7274091 | 0.7223725 |
| ## | 1.00 | L2_dual   | 1e-02 | 0.7856609 | 0.7272305 | 0.7223725 |
| ## | 1.00 | L2_dual   | 1e-01 | 0.7856443 | 0.7272305 | 0.7218169 |
| ## | 1.00 | L2_dual   | 1e+00 | 0.7854121 | 0.7272468 | 0.7223585 |
| ## | 1.00 | L2_primal | 1e-04 | 0.7856409 | 0.7274091 | 0.7223725 |
| ## | 1.00 | L2_primal | 1e-03 | 0.7856208 | 0.7275909 | 0.7227463 |
| ## | 1.00 | L2_primal | 1e-02 | 0.7856042 | 0.7272338 | 0.7223760 |
| ## | 1.00 | L2_primal | 1e-01 | 0.7850584 | 0.7263377 | 0.7212509 |
| ## | 1.00 | L2_primal | 1e+00 | 0.7652542 | 0.7032760 | 0.7177184 |
| ## | 2.00 | L1        | 1e-04 | 0.7855253 | 0.7281299 | 0.7233019 |
| ## | 2.00 | L1        | 1e-03 | 0.7854351 | 0.7283117 | 0.7234906 |
| ## | 2.00 | L1        | 1e-02 | 0.7847448 | 0.7274286 | 0.7231377 |
| ## | 2.00 | L1        | 1e-01 | 0.7818248 | 0.7212955 | 0.7234801 |
| ## | 2.00 | L1        | 1e+00 | 0.7465577 | 0.6741169 | 0.6871523 |
| ## | 2.00 | L2_dual   | 1e-04 | 0.7856152 | 0.7286786 | 0.7223690 |
| ## | 2.00 | L2_dual   | 1e-03 | 0.7856152 | 0.7286786 | 0.7223690 |
| ## | 2.00 | L2_dual   | 1e-02 | 0.7856117 | 0.7286786 | 0.7223690 |
| ## | 2.00 | L2_dual   | 1e-01 | 0.7856584 | 0.7283149 | 0.7225542 |
| ## | 2.00 | L2_dual   | 1e+00 | 0.7853764 | 0.7286753 | 0.7201223 |
| ## | 2.00 | L2_primal | 1e-04 | 0.7856051 | 0.7284968 | 0.7223690 |
| ## | 2.00 | L2_primal | 1e-03 | 0.7856019 | 0.7284968 | 0.7223690 |
| ## | 2.00 | L2_primal | 1e-02 | 0.7855939 | 0.7281364 | 0.7221803 |
| ## | 2.00 | L2_primal | 1e-01 | 0.7850280 | 0.7281364 | 0.7212474 |
| ## | 2.00 | L2_primal | 1e+00 | 0.7651364 | 0.7041688 | 0.7173480 |
| ## | 4.00 | L1        | 1e-04 | 0.7853962 | 0.7276006 | 0.7242278 |
| ## | 4.00 | L1        | 1e-03 | 0.7853122 | 0.7272435 | 0.7240461 |

```
## 4.00 L1 1e-02 0.7843728 0.7274253 0.7233089
## 4.00 L1 1e-01 0.7818287 0.7241786 0.7253389
## 4.00 L1 1e+00 0.7431065 0.6800812 0.6836233
## 4.00 L2_dual 1e-04 0.7855904 0.7293929 0.7229350
## 4.00 L2_dual 1e-03 0.7855938 0.7293929 0.7229350
## 4.00 L2_dual 1e-02 0.7855738 0.7297532 0.7229350
## 4.00 L2_dual 1e-01 0.7855868 0.7295747 0.7227498
## 4.00 L2_dual 1e+00 0.7853885 0.7288506 0.7195528
## 4.00 L2_primal 1e-04 0.7855871 0.7293929 0.7229350
## 4.00 L2_primal 1e-03 0.7855702 0.7295714 0.7227498
## 4.00 L2_primal 1e-02 0.7855932 0.7293896 0.7229315
## 4.00 L2_primal 1e-01 0.7849154 0.7279416 0.7212474
## 4.00 L2_primal 1e+00 0.7650957 0.7038084 0.7179071
##
## ROC was used to select the optimal model using the largest value.
## The final values used for the model were cost = 1, loss = L1 and epsilon
## = 1e-04.

xlradas <- evalm(lr_fit_adas)
```

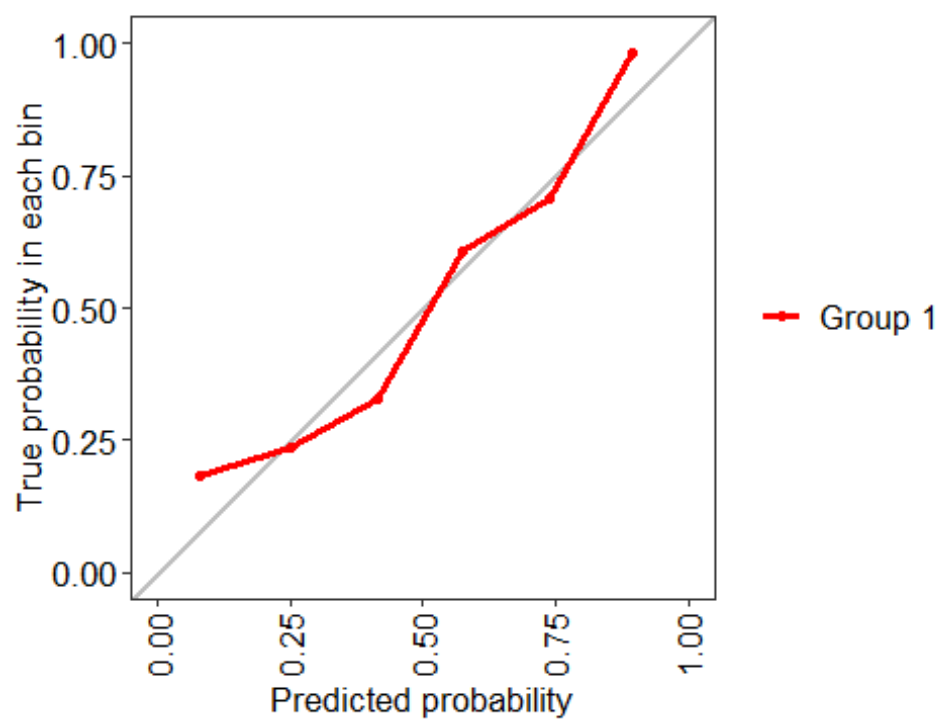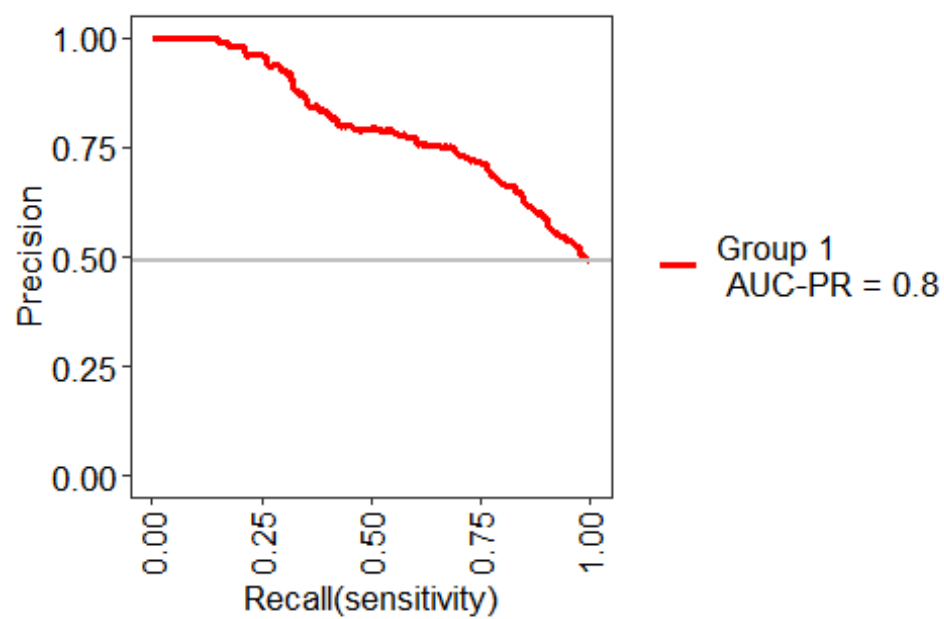

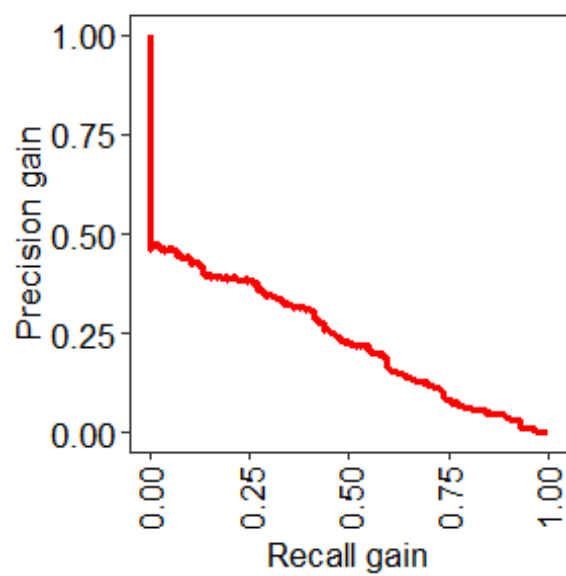

Group 1  
AUC-PRG = 0.23

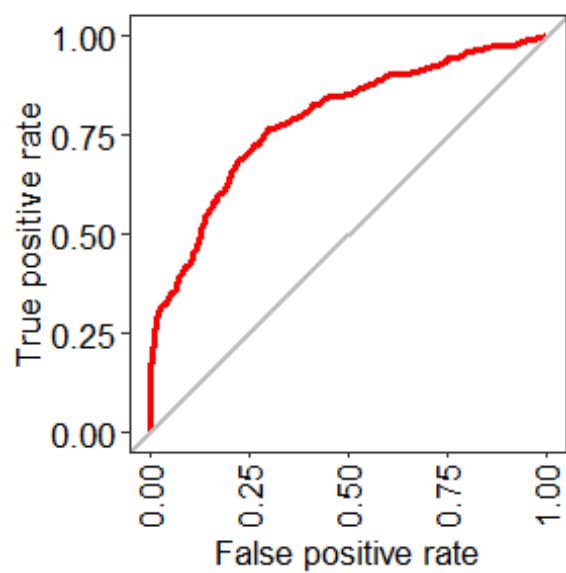

Group 1  
AUC-ROC = 0.79

xlradas\$stdres



```

## `$`Group 1`
##           Score      CI
## SENS      0.730 0.69-0.77
## SPEC      0.726 0.69-0.76
## MCC        0.456      <NA>
## Informedness 0.456      <NA>
## PREC      0.721 0.68-0.76
## NPV        0.735 0.7-0.77
## FPR        0.274      <NA>
## F1         0.725      <NA>
## TP         392.000      <NA>
## FP         152.000      <NA>
## TN         403.000      <NA>
## FN         145.000      <NA>
## AUC-ROC     0.790 0.76-0.82
## AUC-PR      0.800      <NA>
## AUC-PRG     0.230      <NA>

test_pred_lradas <- predict(lr_fit_adas, newdata = testdata)
confusionMatrix(test_pred_lradas, testdata$Outcome)

## Confusion Matrix and Statistics
##
##           Reference
## Prediction favor unfavor
##   favor      159      22
##   unfavor     49      67
##
##           Accuracy : 0.7609
##           95% CI : (0.7083, 0.8083)
##   No Information Rate : 0.7003
##   P-Value [Acc > NIR] : 0.012085
##
##           Kappa : 0.4759
##
##  Mcnemar's Test P-Value : 0.002031
##
##           Sensitivity : 0.7644
##           Specificity : 0.7528
##           Pos Pred Value : 0.8785
##           Neg Pred Value : 0.5776
##           Prevalence : 0.7003
##           Detection Rate : 0.5354
##           Detection Prevalence : 0.6094
##           Balanced Accuracy : 0.7586
##
##           'Positive' Class : favor
##

```

```
test_prob_lradas <- predict(lr_fit_adas, newdata = testdata, type="prob")
mlradas = data.frame(test_prob_lradas, testdata$Outcome)
ylradas<-evalm(mlradas)
```

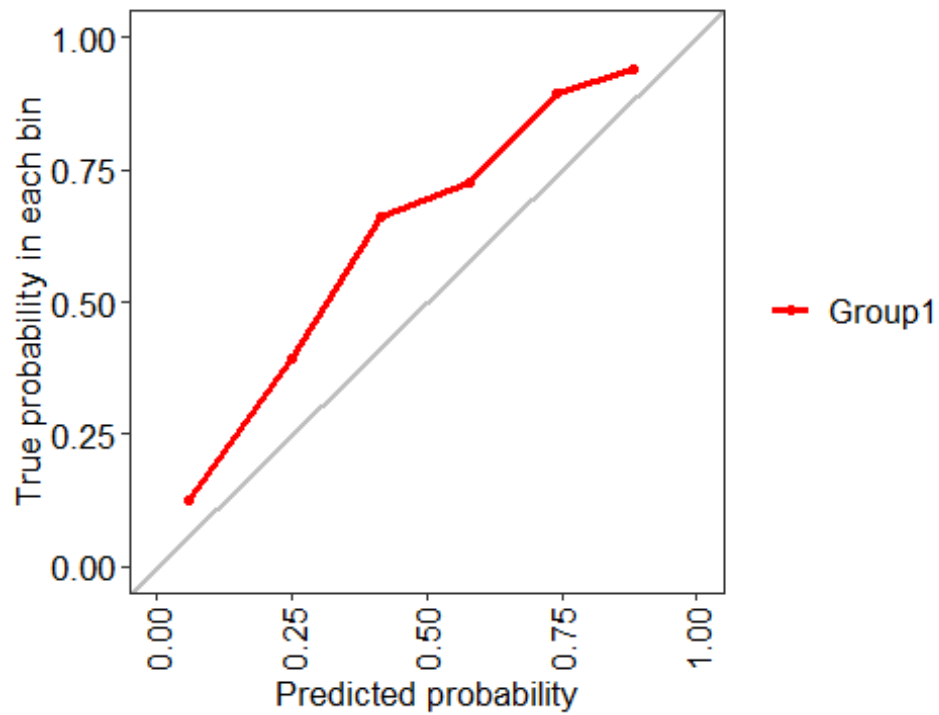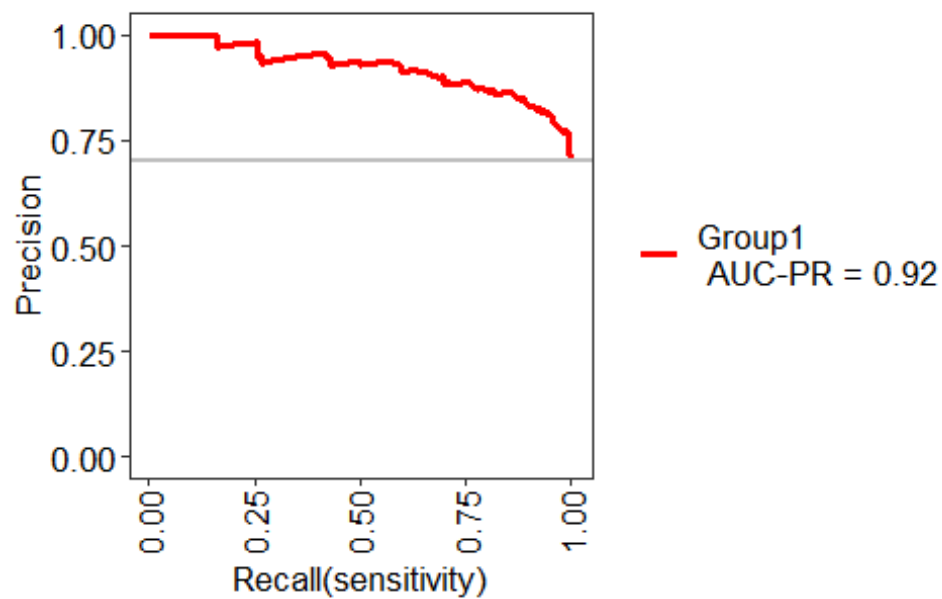

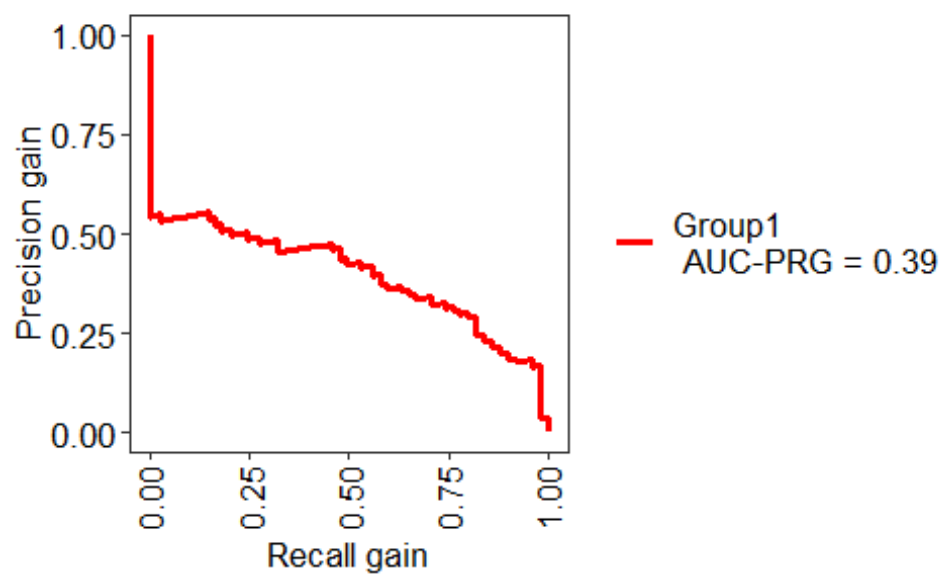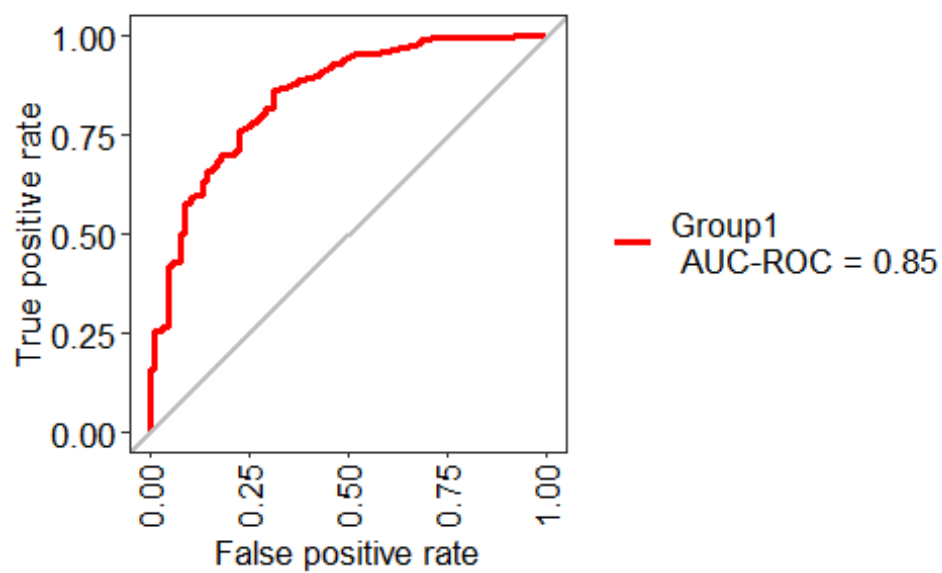

ylradas\$stdres

```

## $Group1
##           Score      CI
## SENS      0.764 0.7-0.82
## SPEC      0.753 0.65-0.83
## MCC       0.486      <NA>
## Informedness 0.517      <NA>
## PREC      0.878 0.82-0.92
## NPV       0.578 0.49-0.66
## FPR       0.247      <NA>
## F1        0.817      <NA>
## TP        159.000      <NA>
## FP        22.000      <NA>
## TN        67.000      <NA>
## FN        49.000      <NA>
## AUC-ROC    0.850 0.81-0.89
## AUC-PR     0.920      <NA>
## AUC-PRG    0.390      <NA>

traindata$Outcome<-ifelse(traindata$Outcome=="unfavor", 'X1','X2')
testdata$Outcome<-ifelse(testdata$Outcome=="unfavor", 'X1','X2')
traindata$Outcome<-as.factor(traindata$Outcome)
testdata$Outcome<-as.factor(testdata$Outcome)
table(traindata$Outcome)

##
##  X1  X2
## 232 537

table(testdata$Outcome)

##
##  X1  X2
##  89 208

set.seed(seed)
rf_fit1 <- train(Outcome~., data = traindata, method = "rf",
                trControl=ctrl, metric=metric, tuneLength=10,
                ntree=500, verbose=FALSE)
rf_fit1

## Random Forest
##
## 769 samples
## 60 predictor
## 2 classes: 'X1', 'X2'
##
## No pre-processing
## Resampling: Cross-Validated (10 fold, repeated 10 times)
## Summary of sample sizes: 691, 693, 693, 693, 692, 692, ...
## Resampling results across tuning parameters:

```

```
##
## mtry ROC Sens Spec
## 2 0.7559333 0.04213768 0.9953494
## 8 0.7894252 0.35637681 0.9318484
## 14 0.7965962 0.41882246 0.9098672
## 21 0.7976357 0.45202899 0.9007512
## 27 0.7985394 0.46634058 0.8955136
## 34 0.7978595 0.47971014 0.8865828
## 40 0.7975575 0.48320652 0.8834277
## 47 0.7962521 0.48324275 0.8826695
## 53 0.7941233 0.48530797 0.8791509
## 60 0.7944241 0.49092391 0.8780119
##
## ROC was used to select the optimal model using the largest value.
## The final value used for the model was mtry = 27.

x1 <- evalm(rf_fit1)
```

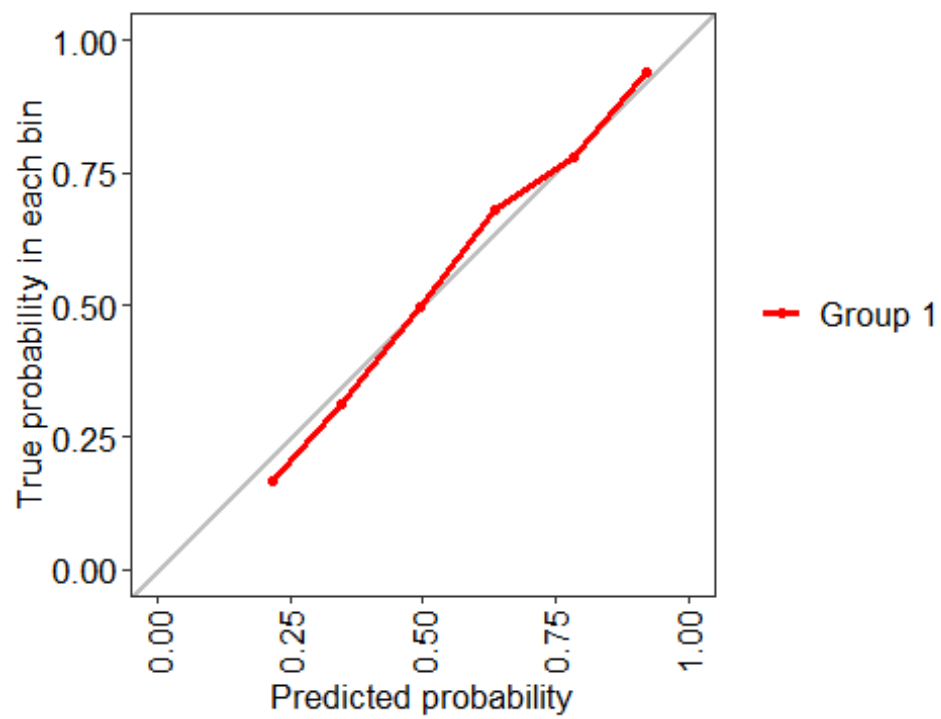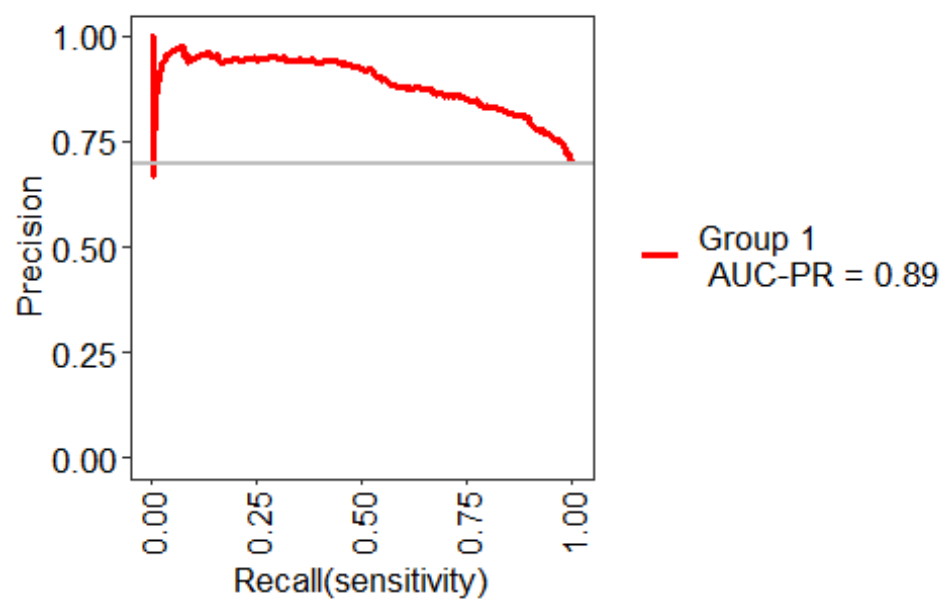

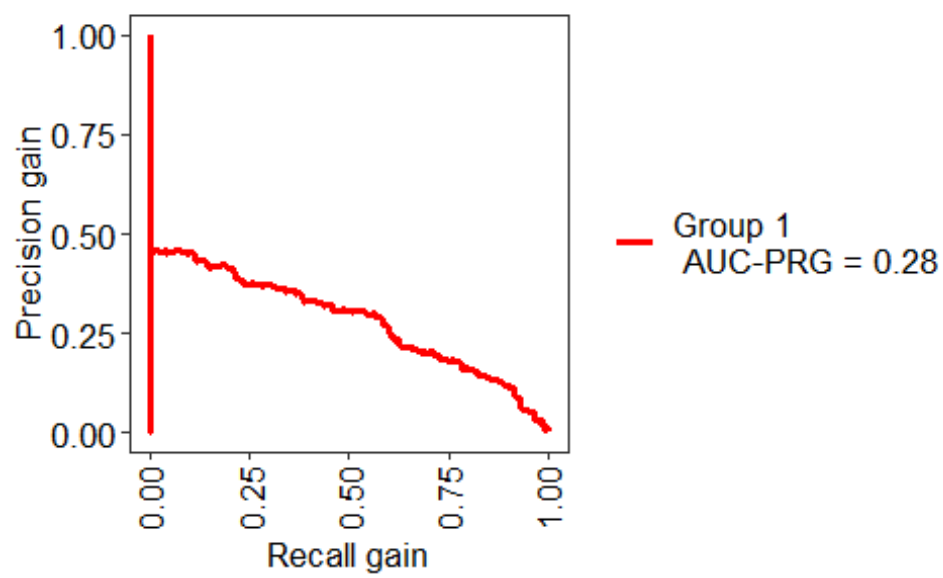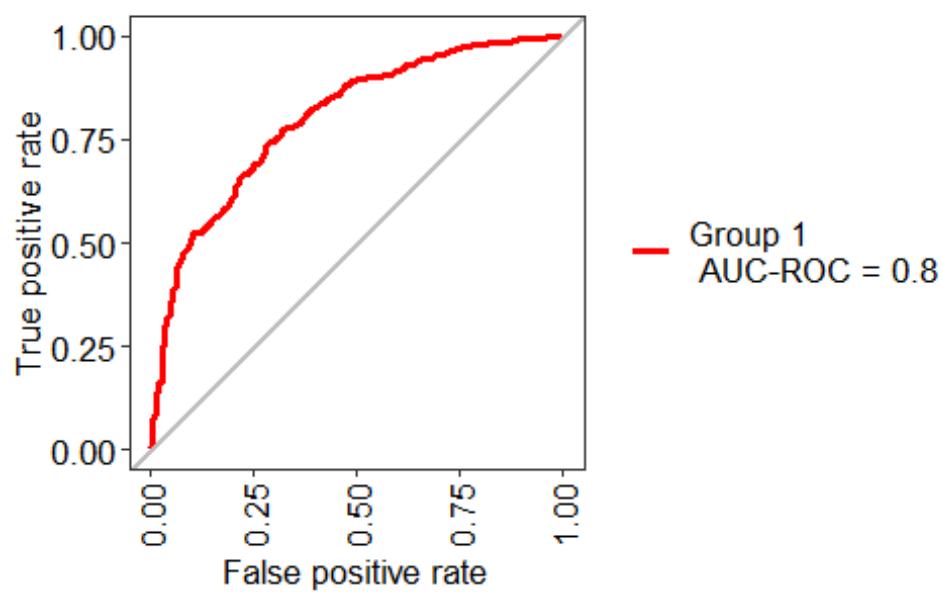

x1\$stdres

```

## `$`Group 1`
##           Score      CI
## SENS      0.899 0.87-0.92
## SPEC      0.457 0.39-0.52
## MCC       0.403      <NA>
## Informedness 0.356      <NA>
## PREC      0.793 0.76-0.82
## NPV       0.662 0.59-0.73
## FPR       0.543      <NA>
## F1        0.843      <NA>
## TP        483.000      <NA>
## FP        126.000      <NA>
## TN        106.000      <NA>
## FN         54.000      <NA>
## AUC-ROC    0.800 0.77-0.83
## AUC-PR     0.890      <NA>
## AUC-PRG    0.280      <NA>

test_pred_rf1 <- predict(rf_fit1, newdata = testdata)
confusionMatrix(test_pred_rf1, testdata$Outcome)

## Confusion Matrix and Statistics
##
##           Reference
## Prediction  X1  X2
##           X1 46  22
##           X2 43 186
##
##           Accuracy : 0.7811
##           95% CI : (0.7297, 0.8268)
##           No Information Rate : 0.7003
##           P-Value [Acc > NIR] : 0.001122
##
##           Kappa : 0.4408
##
##  Mcnemar's Test P-Value : 0.013113
##
##           Sensitivity : 0.5169
##           Specificity : 0.8942
##           Pos Pred Value : 0.6765
##           Neg Pred Value : 0.8122
##           Prevalence : 0.2997
##           Detection Rate : 0.1549
##           Detection Prevalence : 0.2290
##           Balanced Accuracy : 0.7055
##
##           'Positive' Class : X1
##

```



```
test_prob_rf1 <- predict(rf_fit1, newdata = testdata, type="prob")  
m1 = data.frame(test_prob_rf1, testdata$Outcome)  
y1<-evalm(m1)
```

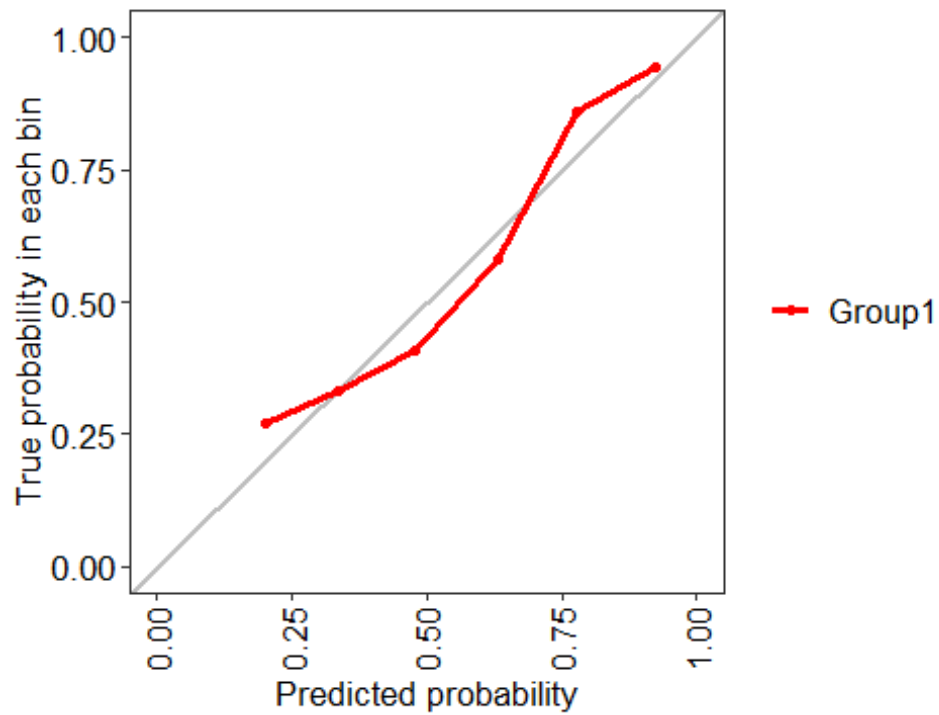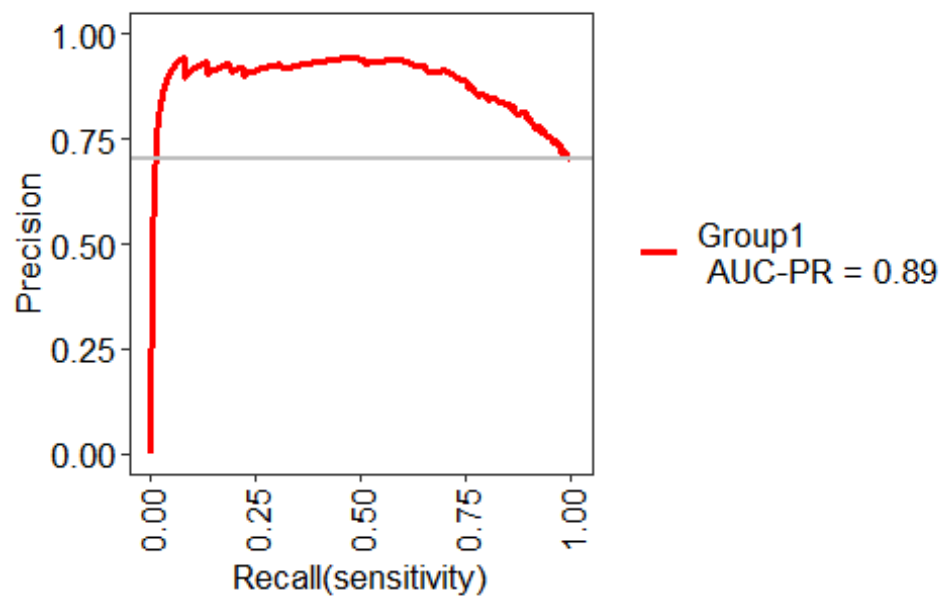

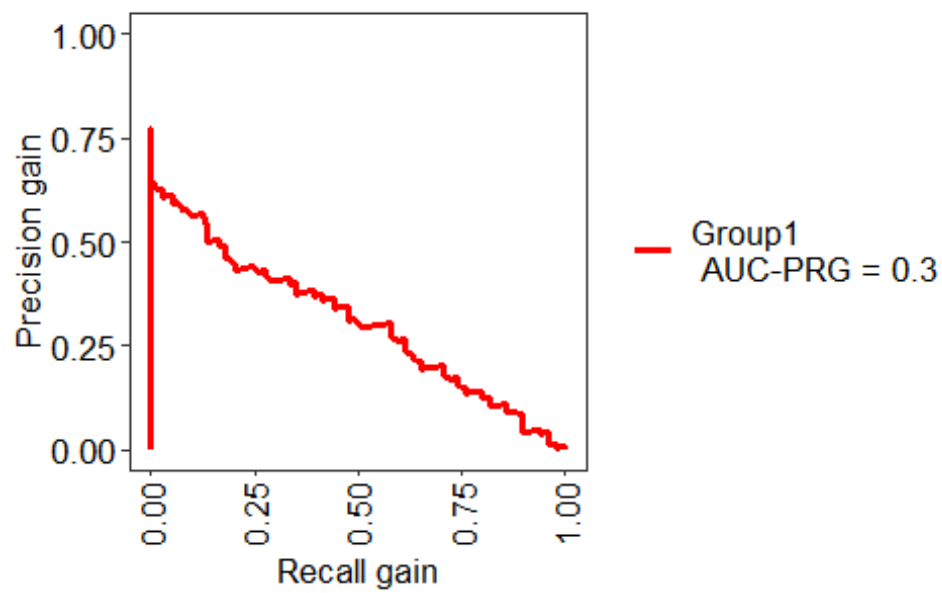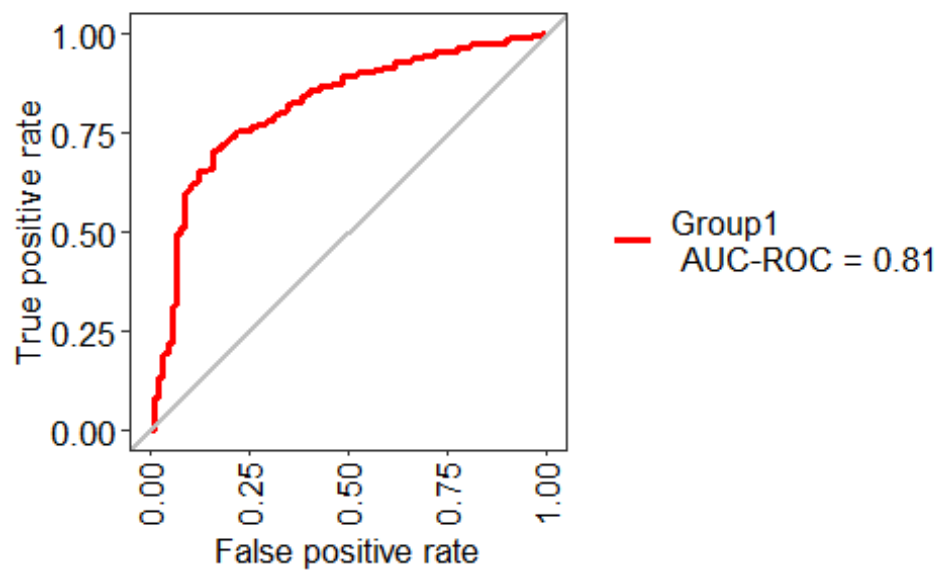

y1\$stdres

```

## $Group1
##           Score      CI
## SENS      0.894 0.85-0.93
## SPEC      0.494 0.39-0.6
## MCC       0.428 <NA>
## Informedness 0.389 <NA>
## PREC      0.805 0.75-0.85
## NPV       0.667 0.55-0.77
## FPR       0.506 <NA>
## F1        0.847 <NA>
## TP        186.000 <NA>
## FP        45.000 <NA>
## TN        44.000 <NA>
## FN        22.000 <NA>
## AUC-ROC    0.810 0.76-0.86
## AUC-PR     0.890 <NA>
## AUC-PRG    0.300 <NA>

imp1<-varImp(rf_fit1, scale = FALSE)
imp1

## rf variable importance
##
##   only 20 most important variables shown (out of 60)
##
##           Overall
## NIHSS_adm    56.406
## Age          43.365
## Arrival      16.305
## RanGlu       13.954
## TG           13.773
## Hb           13.589
## PLT          13.480
## LDL          13.078
## BMI          13.046
## BUN          12.446
## HbA1C        12.167
## HDL          11.589
## TC           11.110
## SBP          11.000
## DBP          10.957
## AC           9.621
## Cr           6.940
## PRE_STROKE.2 1.818
## Subtype.CE   1.693
## Subtype.SVO  1.544

plot(imp1)

```

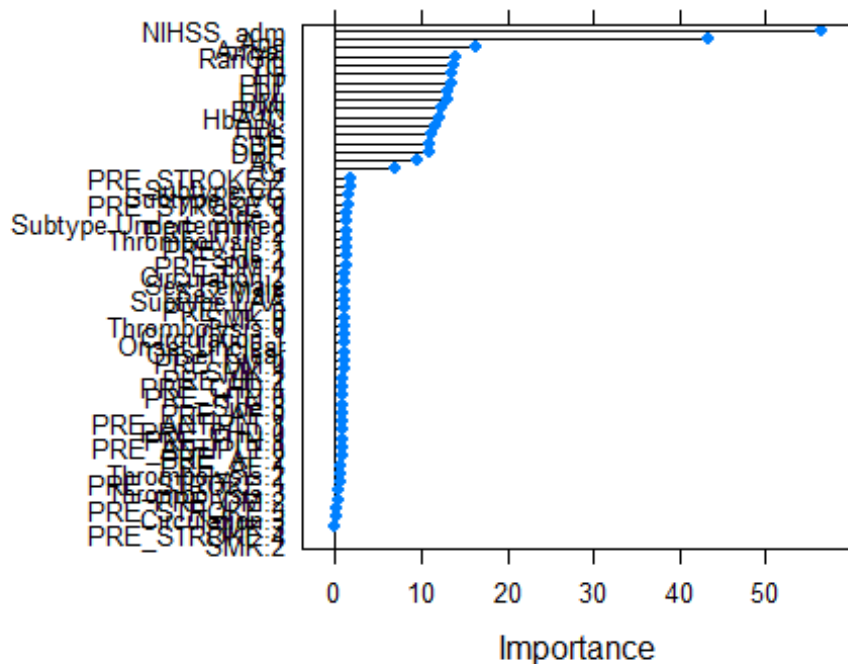

```
set.seed(seed)
rf_fit2 <- train(Outcome~., data = traindata, method = "rf",
                 trControl=ctrl, metric=metric, tuneLength=10,
                 ntree=1000, verbose=FALSE)

rf_fit2

## Random Forest
##
## 769 samples
## 60 predictor
## 2 classes: 'X1', 'X2'
##
## No pre-processing
## Resampling: Cross-Validated (10 fold, repeated 10 times)
## Summary of sample sizes: 691, 693, 693, 693, 692, 692, ...
## Resampling results across tuning parameters:
##
##  mtry  ROC      Sens      Spec
##    2    0.7590144 0.0409058 0.9960867
##    8    0.7909054 0.3559783 0.9314710
##   14    0.7969542 0.4158877 0.9100489
##   21    0.7985477 0.4511413 0.9024179
##   27    0.7989268 0.4697464 0.8955276
##   34    0.7987021 0.4814855 0.8878896
##   40    0.7978965 0.4887500 0.8836094
##   47    0.7965168 0.4819565 0.8813697
```

```
##    53    0.7953973  0.4836051  0.8796890
##    60    0.7949668  0.4891667  0.8795073
##
## ROC was used to select the optimal model using the largest value.
## The final value used for the model was mtry = 27.
x2 <- evalm(rf_fit2)
```

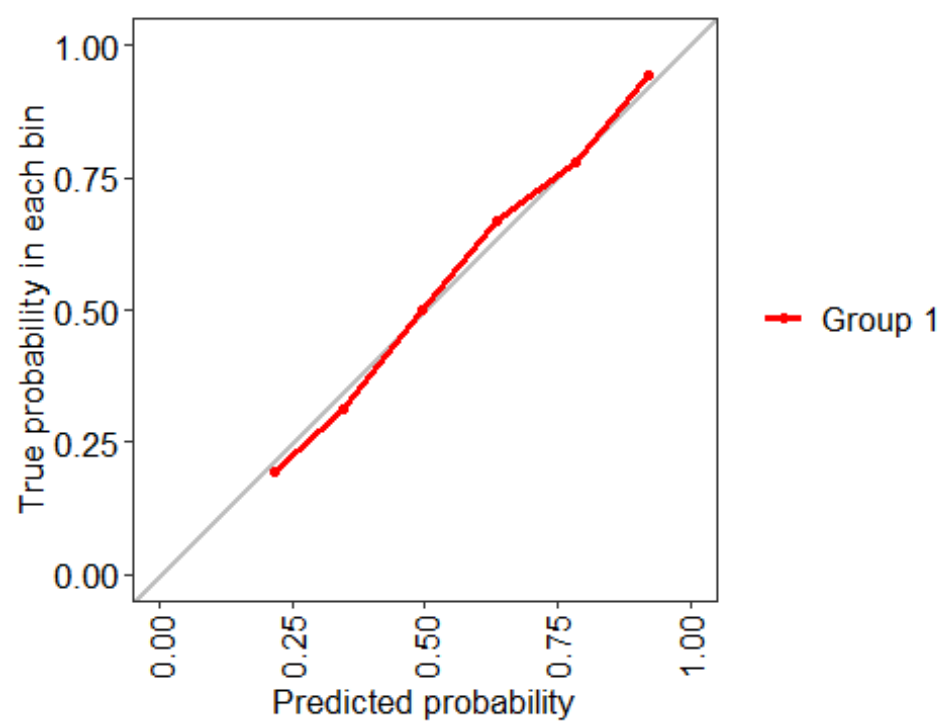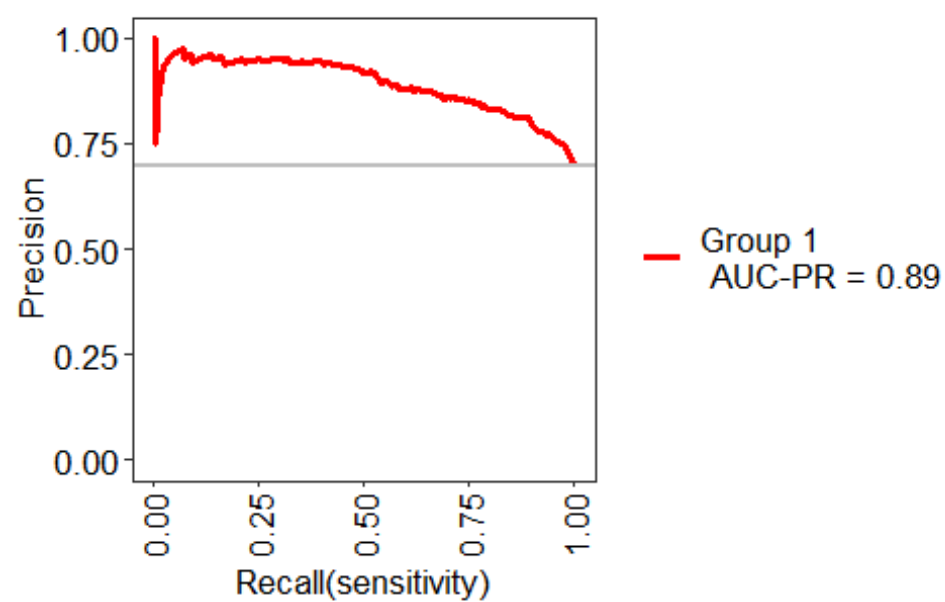

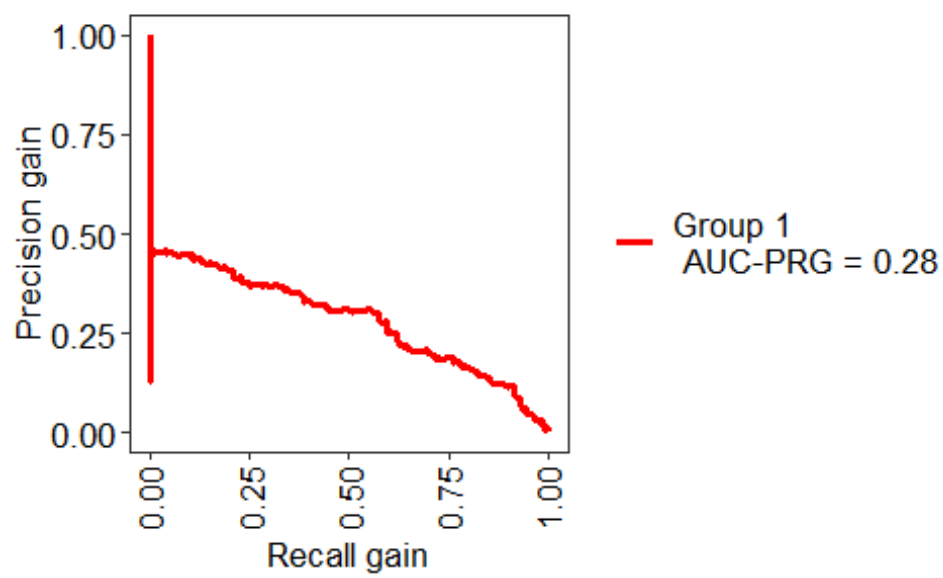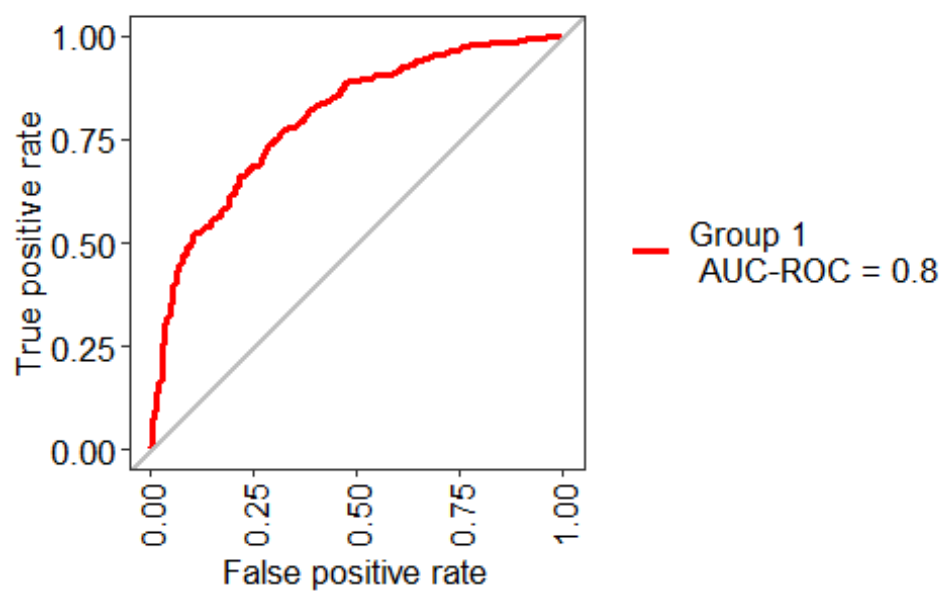

x2\$stdres

```

## `$`Group 1`
##           Score      CI
## SENS      0.898 0.87-0.92
## SPEC      0.466 0.4-0.53
## MCC       0.408      <NA>
## Informedness 0.363      <NA>
## PREC      0.795 0.76-0.83
## NPV       0.663 0.59-0.73
## FPR       0.534      <NA>
## F1        0.843      <NA>
## TP        482.000      <NA>
## FP        124.000      <NA>
## TN        108.000      <NA>
## FN         55.000      <NA>
## AUC-ROC    0.800 0.77-0.83
## AUC-PR     0.890      <NA>
## AUC-PRG    0.280      <NA>

test_pred_rf2 <- predict(rf_fit2, newdata = testdata)
confusionMatrix(test_pred_rf2, testdata$Outcome)

## Confusion Matrix and Statistics
##
##           Reference
## Prediction  X1  X2
##           X1 45  23
##           X2 44 185
##
##           Accuracy : 0.7744
##           95% CI : (0.7226, 0.8207)
##           No Information Rate : 0.7003
##           P-Value [Acc > NIR] : 0.00266
##
##           Kappa : 0.4236
##
## Mcnemar's Test P-Value : 0.01455
##
##           Sensitivity : 0.5056
##           Specificity : 0.8894
##           Pos Pred Value : 0.6618
##           Neg Pred Value : 0.8079
##           Prevalence : 0.2997
##           Detection Rate : 0.1515
##           Detection Prevalence : 0.2290
##           Balanced Accuracy : 0.6975
##
##           'Positive' Class : X1
##

```



```
test_prob_rf2 <- predict(rf_fit2, newdata = testdata, type="prob")  
m2 = data.frame(test_prob_rf2, testdata$Outcome)  
y2<-evalm(m2)
```

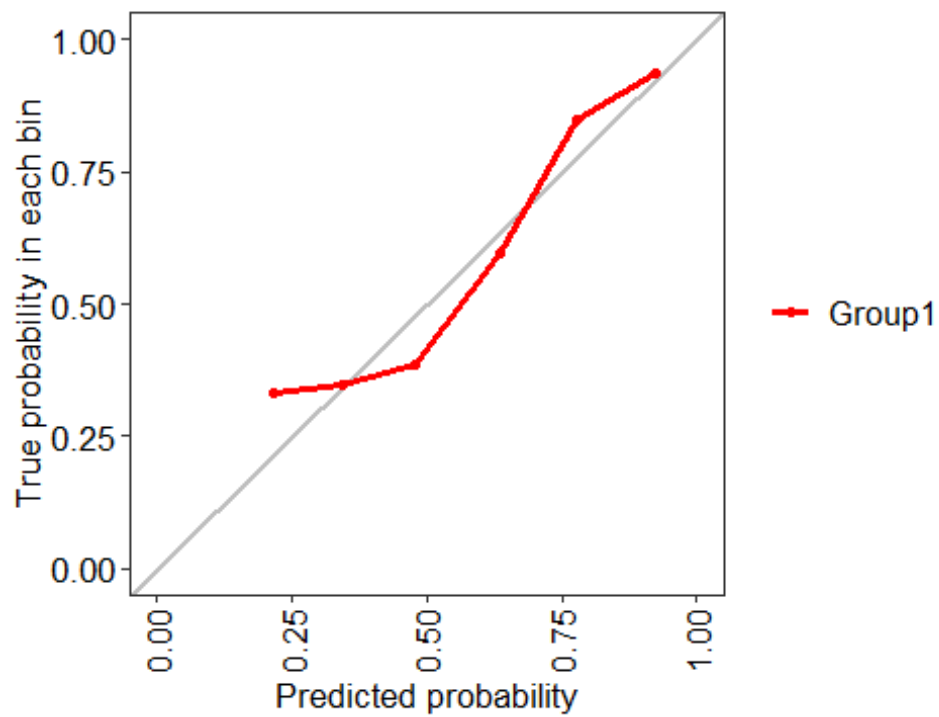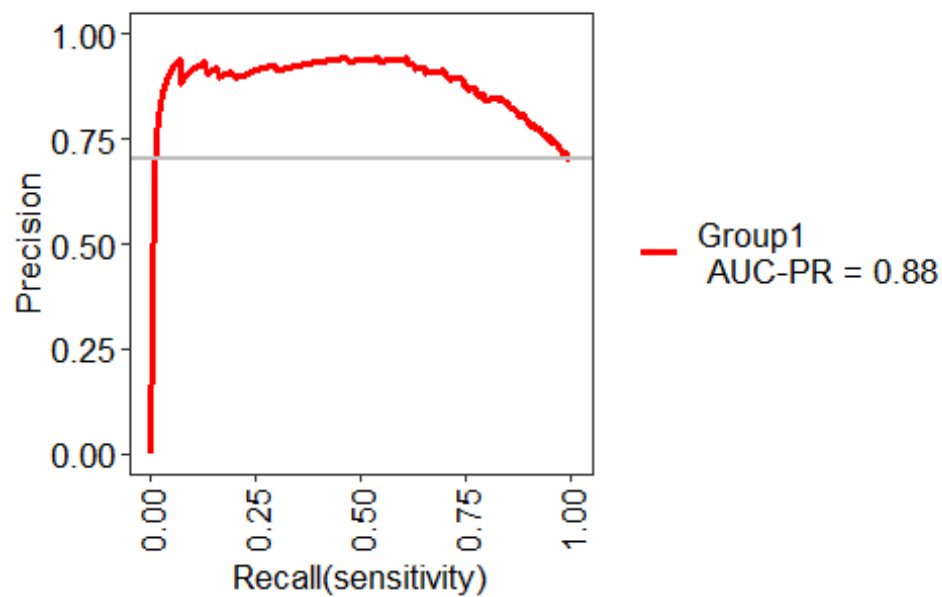

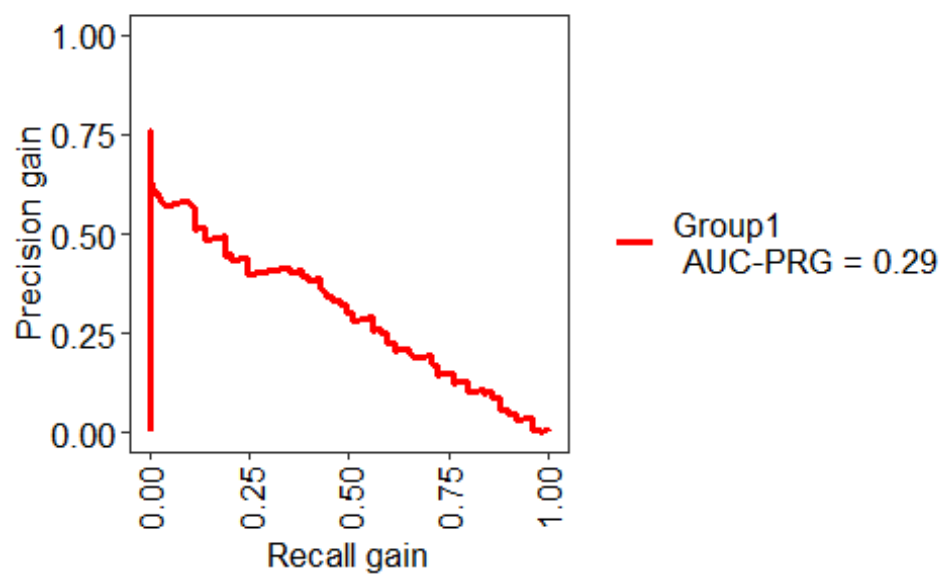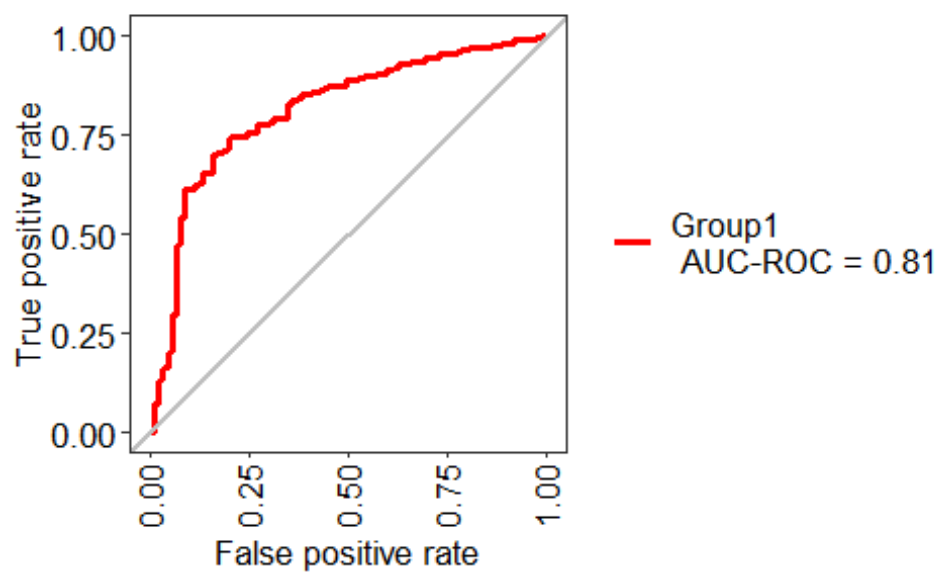

y2\$stdres

```
## $Group1
##           Score      CI
## SENS      0.889 0.84-0.93
## SPEC      0.506 0.4-0.61
## MCC       0.431 <NA>
## Informedness 0.395 <NA>
## PREC      0.808 0.75-0.85
## NPV       0.662 0.54-0.76
## FPR       0.494 <NA>
## F1        0.847 <NA>
## TP        185.000 <NA>
## FP        44.000 <NA>
## TN        45.000 <NA>
## FN        23.000 <NA>
## AUC-ROC    0.810 0.76-0.86
## AUC-PR     0.880 <NA>
## AUC-PRG    0.290 <NA>

imp2<-varImp(rf_fit2, scale = FALSE)
imp2

## rf variable importance
##
## only 20 most important variables shown (out of 60)
##
##           Overall
## NIHSS_adm    56.900
## Age          43.162
## Arrival      16.153
## RanGlu       14.061
## PLT          13.754
## TG           13.596
## BMI          13.241
## LDL          13.138
## Hb           13.071
## HbA1C        12.462
## BUN          12.224
## HDL          12.134
## DBP          10.981
## TC           10.873
## SBP          10.814
## AC           9.869
## Cr           6.778
## PRE_STROKE.2 1.896
## Subtype.CE   1.579
## Subtype.SVO  1.554

plot(imp2)
```

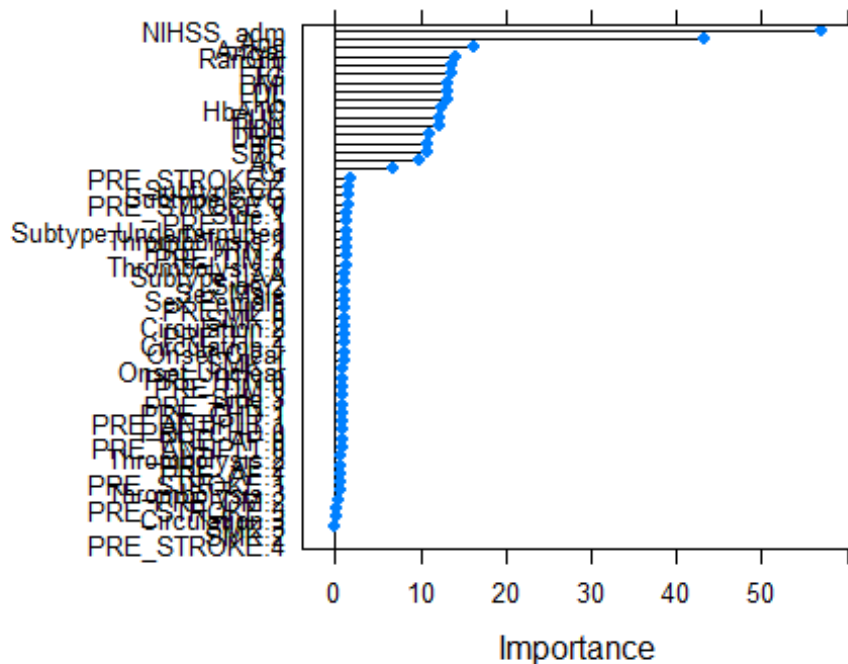

```
set.seed(seed)
rf_fit3 <- train(Outcome~., data = traindata, method = "rf",
                 trControl=ctrl, metric=metric, tuneLength=10,
                 ntree=1500, verbose=FALSE)

rf_fit3

## Random Forest
##
## 769 samples
## 60 predictor
## 2 classes: 'X1', 'X2'
##
## No pre-processing
## Resampling: Cross-Validated (10 fold, repeated 10 times)
## Summary of sample sizes: 691, 693, 693, 693, 692, 692, ...
## Resampling results across tuning parameters:
##
##  mtry  ROC      Sens      Spec
##    2    0.7598498 0.04047101 0.9962753
##    8    0.7912578 0.35336957 0.9312788
##   14    0.7971415 0.41675725 0.9102446
##   21    0.7987851 0.45119565 0.9005556
##   27    0.7990912 0.46846014 0.8946017
##   34    0.7986602 0.48019928 0.8882635
##   40    0.7980862 0.48659420 0.8847170
##   47    0.7963529 0.48322464 0.8815549
```

```
##    53    0.7958040  0.48489130  0.8796890
##    60    0.7950050  0.48918478  0.8800594
##
## ROC was used to select the optimal model using the largest value.
## The final value used for the model was mtry = 27.
x3 <- evalm(rf_fit3)
```

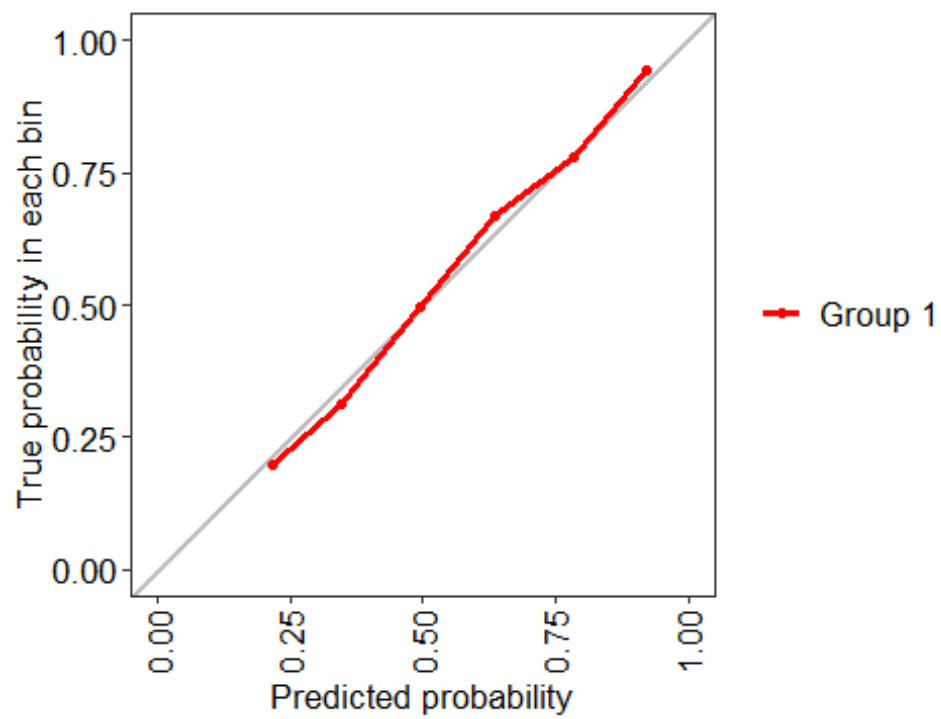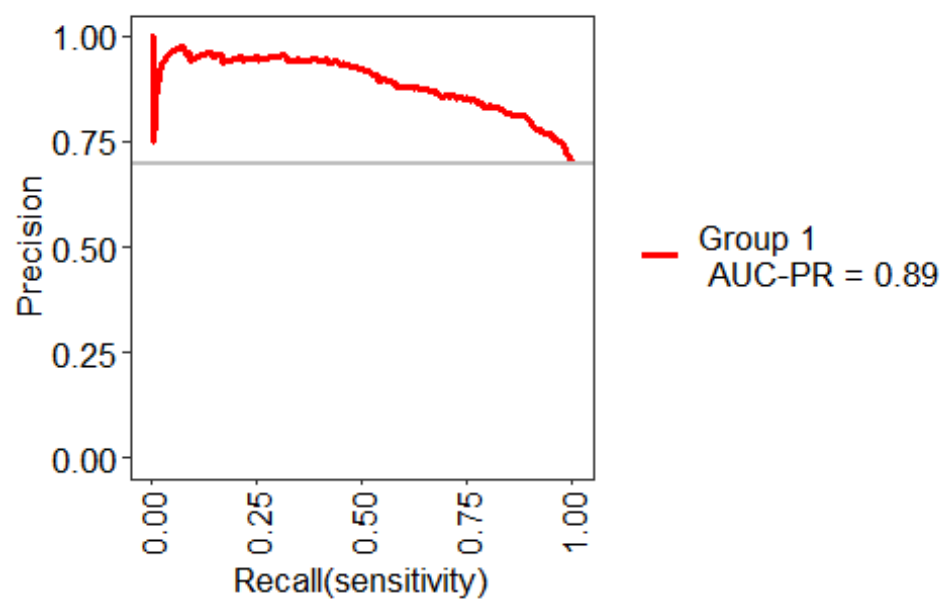

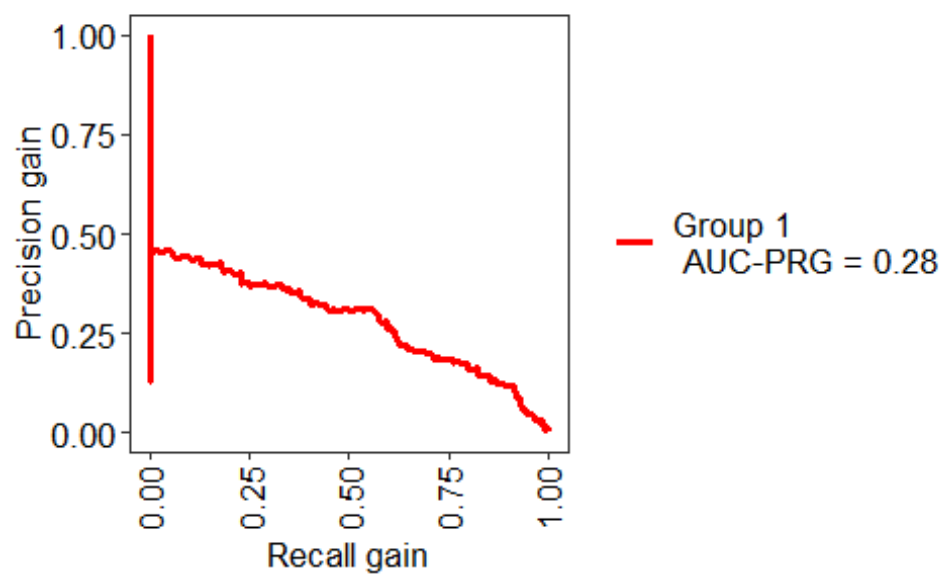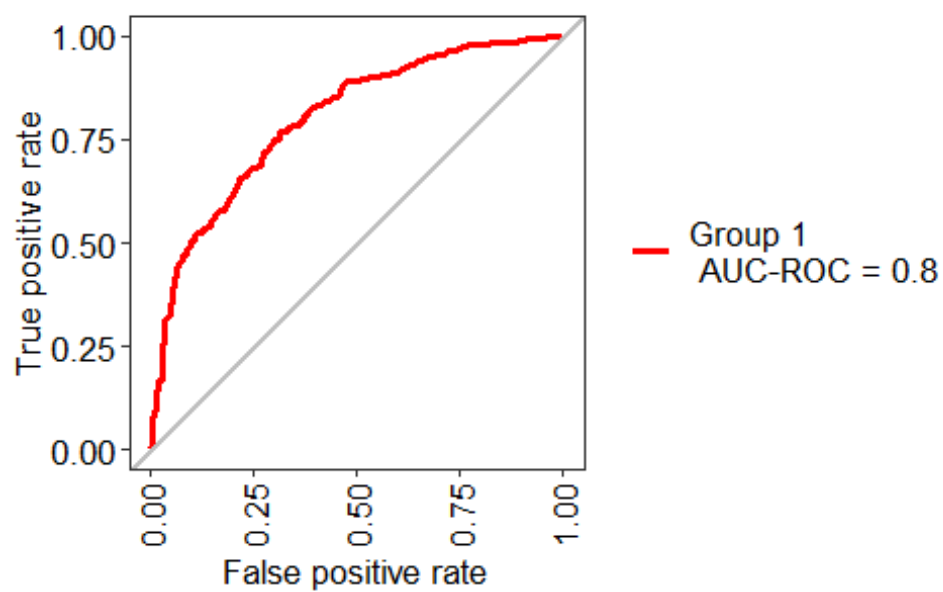

x3\$stdres

```

## `$`Group 1`
##           Score      CI
## SENS      0.901 0.87-0.92
## SPEC      0.466 0.4-0.53
## MCC       0.414 <NA>
## Informedness 0.367 <NA>
## PREC      0.796 0.76-0.83
## NPV       0.671 0.59-0.74
## FPR       0.534 <NA>
## F1        0.845 <NA>
## TP        484.000 <NA>
## FP        124.000 <NA>
## TN        108.000 <NA>
## FN         53.000 <NA>
## AUC-ROC    0.800 0.77-0.83
## AUC-PR     0.890 <NA>
## AUC-PRG    0.280 <NA>

test_pred_rf3 <- predict(rf_fit3, newdata = testdata)
confusionMatrix(test_pred_rf3, testdata$Outcome)

## Confusion Matrix and Statistics
##
##           Reference
## Prediction  X1  X2
##           X1  43  22
##           X2  46 186
##
##           Accuracy : 0.771
##           95% CI : (0.719, 0.8176)
##           No Information Rate : 0.7003
##           P-Value [Acc > NIR] : 0.003986
##
##           Kappa : 0.4089
##
## Mcnemar's Test P-Value : 0.005285
##
##           Sensitivity : 0.4831
##           Specificity : 0.8942
##           Pos Pred Value : 0.6615
##           Neg Pred Value : 0.8017
##           Prevalence : 0.2997
##           Detection Rate : 0.1448
##           Detection Prevalence : 0.2189
##           Balanced Accuracy : 0.6887
##
##           'Positive' Class : X1
##

```



```
test_prob_rf3 <- predict(rf_fit3, newdata = testdata, type="prob")
m3 = data.frame(test_prob_rf3, testdata$Outcome)
y3<-evalm(m3)
```

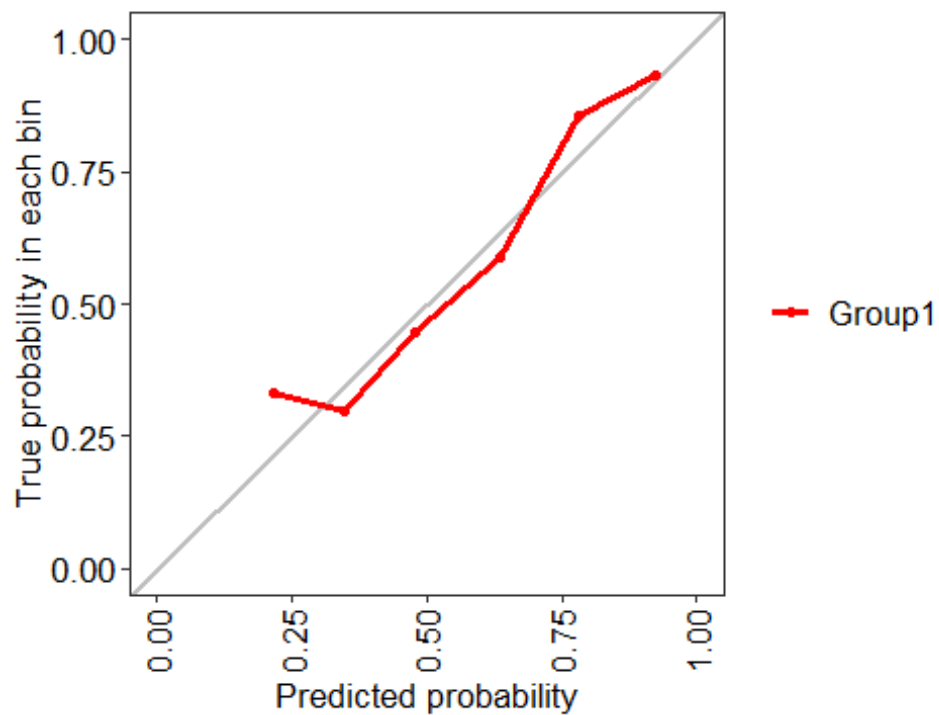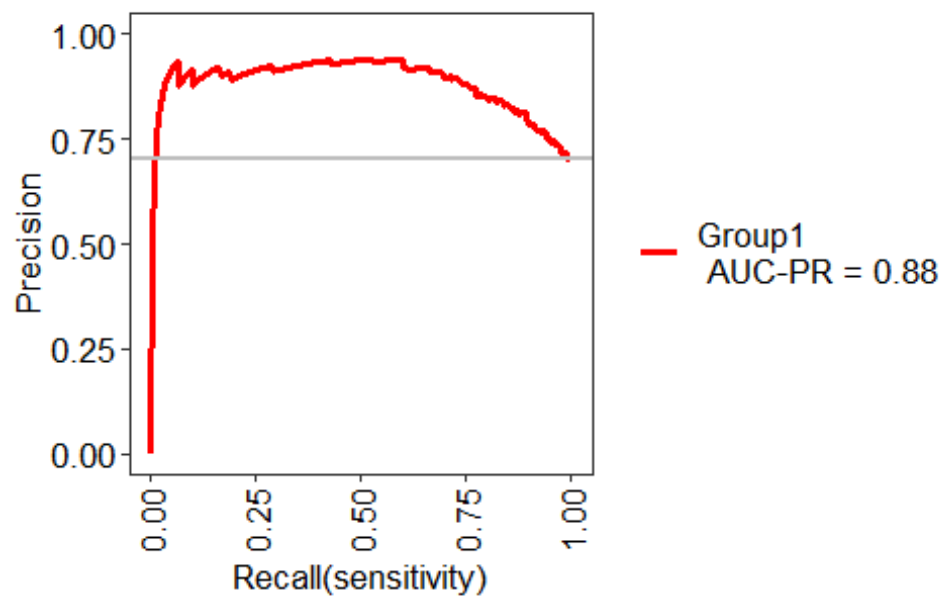

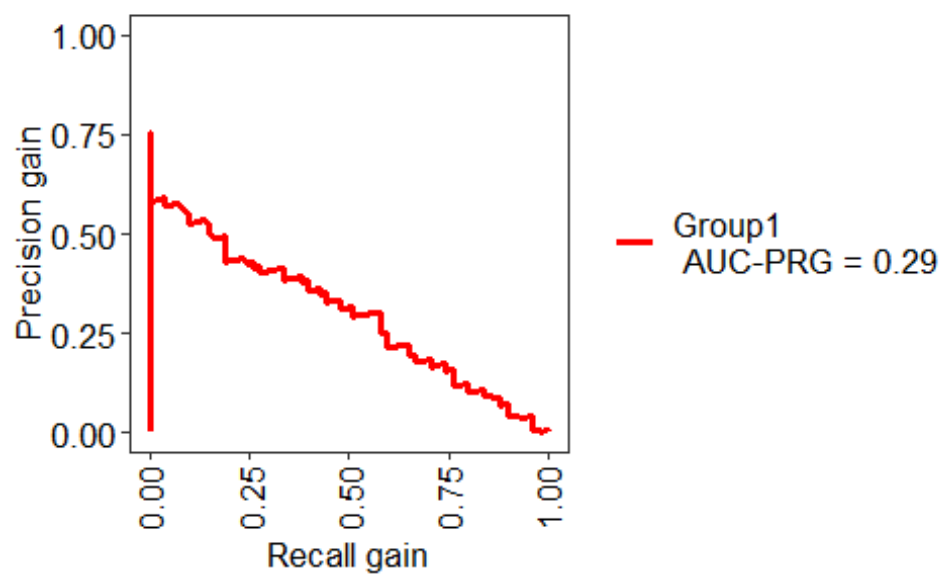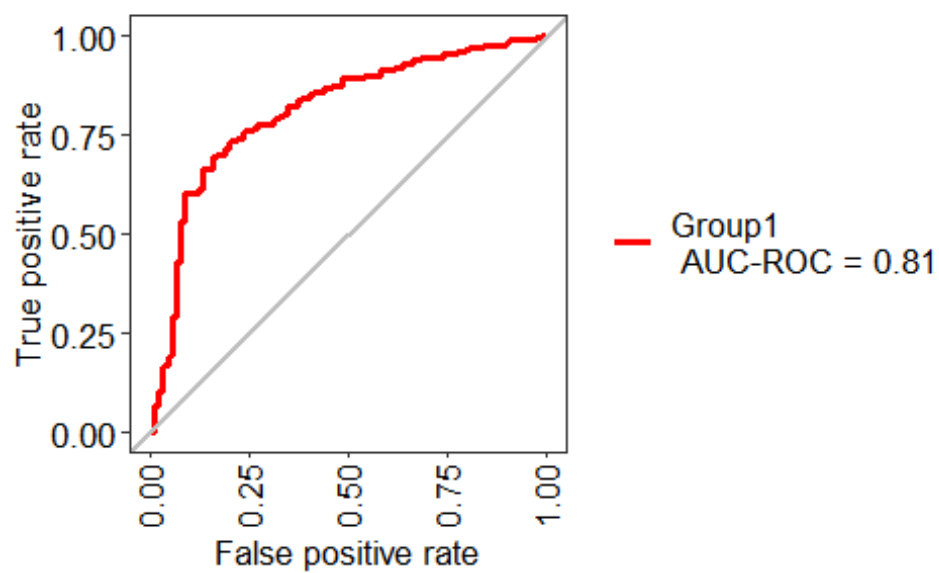

```
y3$stdres
```

```

## $Group1
##           Score      CI
## SENS      0.894 0.85-0.93
## SPEC      0.483 0.38-0.59
## MCC       0.418      <NA>
## Informedness 0.377      <NA>
## PREC      0.802 0.75-0.85
## NPV       0.662 0.54-0.76
## FPR       0.517      <NA>
## F1        0.845      <NA>
## TP        186.000      <NA>
## FP        46.000      <NA>
## TN        43.000      <NA>
## FN        22.000      <NA>
## AUC-ROC    0.810 0.76-0.86
## AUC-PR     0.880      <NA>
## AUC-PRG    0.290      <NA>

imp3<-varImp(rf_fit3, scale = FALSE)
imp3

## rf variable importance
##
##   only 20 most important variables shown (out of 60)
##
##           Overall
## NIHSS_adm    56.364
## Age          43.275
## Arrival      16.134
## RanGlu       14.056
## PLT          13.818
## TG           13.573
## BMI          13.341
## Hb           13.258
## LDL          13.247
## HbA1C        12.638
## BUN          12.195
## HDL          11.877
## TC           11.074
## DBP          11.001
## SBP          10.805
## AC           9.854
## Cr           6.832
## PRE_STROKE.2 1.928
## PRE_STROKE.0 1.549
## Subtype.CE   1.540

plot(imp3)

```

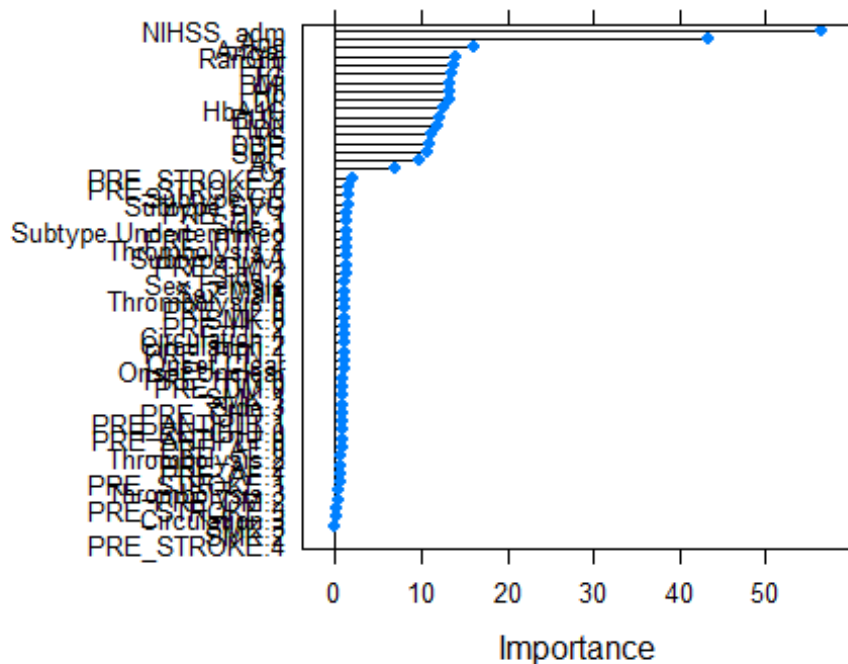

```
set.seed(seed)
xgb_fit <- train(Outcome~., data = traindata, method = "xgbTree",
                 trControl=ctrl, metric=metric, tuneGrid=xgbgrid)
xgb_fit

## eXtreme Gradient Boosting
##
## 769 samples
## 60 predictor
## 2 classes: 'X1', 'X2'
##
## No pre-processing
## Resampling: Cross-Validated (10 fold, repeated 10 times)
## Summary of sample sizes: 691, 693, 693, 693, 692, 692, ...
## Resampling results across tuning parameters:
##
##  eta    max_depth  nrounds  ROC        Sens       Spec
##  0.01    6          500      0.8072146  0.4336051  0.9031481
##  0.01    6          1000     0.8042736  0.4453080  0.8966492
##  0.01    6          1500     0.8025172  0.4475181  0.8908840
##  0.01    8          500      0.8044211  0.4172645  0.9070545
##  0.01    8          1000     0.8035490  0.4358877  0.8981237
##  0.01    8          1500     0.8021440  0.4453986  0.8936618
##  0.10    6          500      0.7880677  0.4604167  0.8742907
##  0.10    6          1000     0.7843400  0.4655435  0.8699930
##  0.10    6          1500     0.7819935  0.4664312  0.8688784
```

```
##    0.10  8          500      0.7907394  0.4634601  0.8770964
##    0.10  8          1000     0.7870869  0.4681703  0.8744724
##    0.10  8          1500     0.7844929  0.4733333  0.8733473
##
## Tuning parameter 'gamma' was held constant at a value of 0
## Tuning
##
## Tuning parameter 'min_child_weight' was held constant at a value of 1
##
## Tuning parameter 'subsample' was held constant at a value of 0.8
## ROC was used to select the optimal model using the largest value.
## The final values used for the model were nrounds = 500, max_depth = 6, eta
## = 0.01, gamma = 0, colsample_bytree = 0.6, min_child_weight = 1 and
## subsample = 0.8.
x_xgb <- evalm(xgb_fit)
```

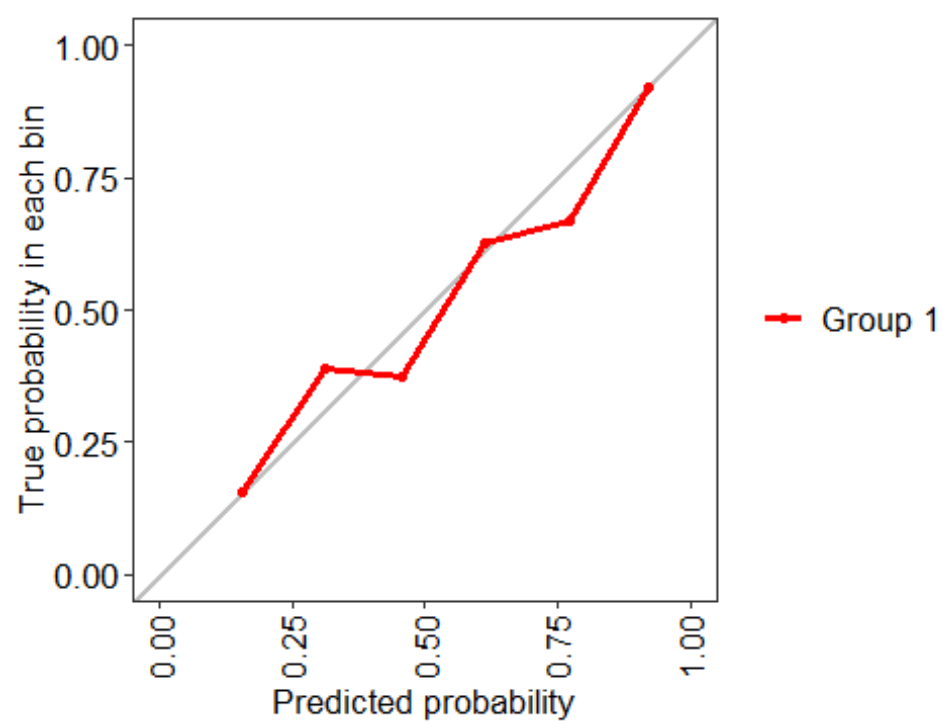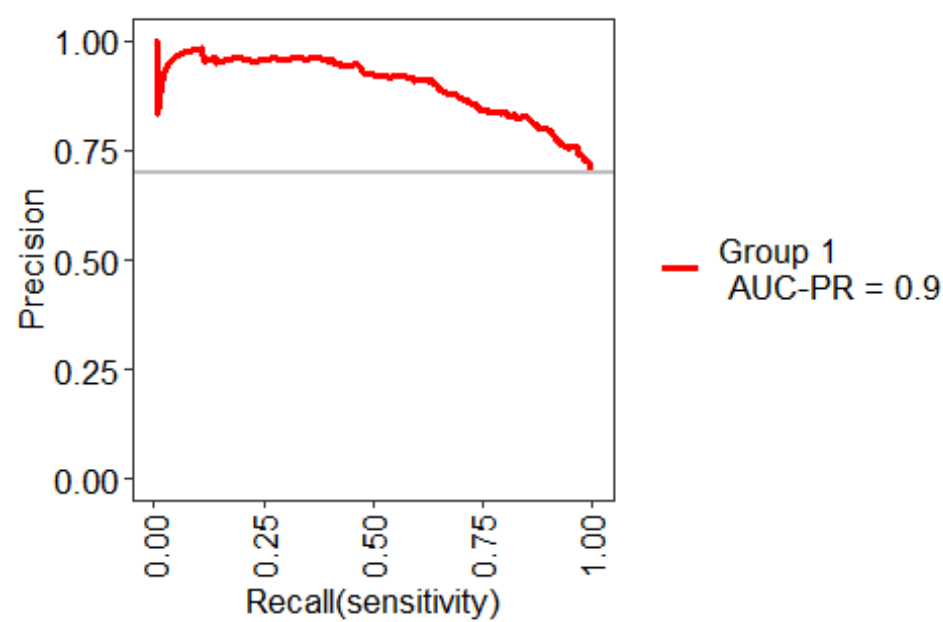

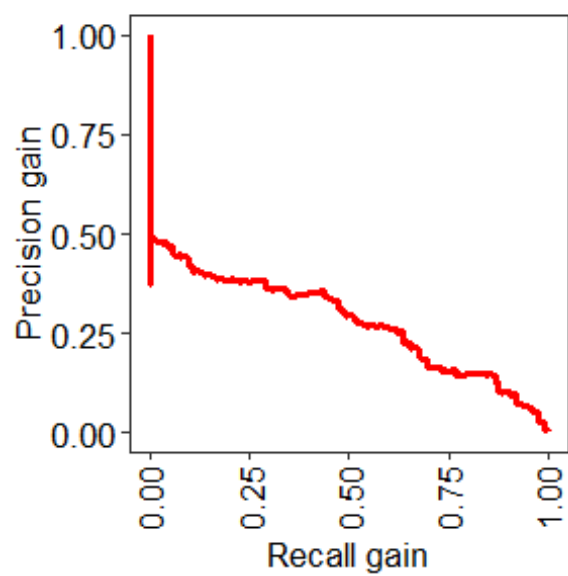

Group 1  
AUC-PRG = 0.28

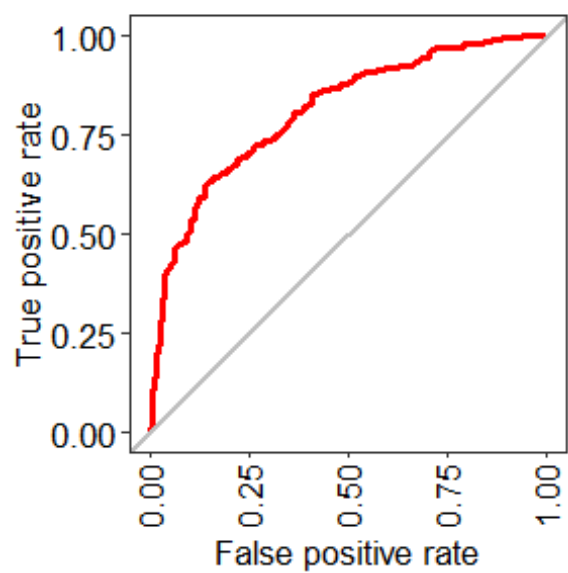

Group 1  
AUC-ROC = 0.81

`x_xgb$stdres`

```

## `$`Group 1`
##           Score      CI
## SENS      0.909 0.88-0.93
## SPEC      0.440 0.38-0.5
## MCC       0.403 <NA>
## Informedness 0.348 <NA>
## PREC      0.790 0.76-0.82
## NPV       0.675 0.6-0.75
## FPR       0.560 <NA>
## F1        0.845 <NA>
## TP        488.000 <NA>
## FP        130.000 <NA>
## TN        102.000 <NA>
## FN         49.000 <NA>
## AUC-ROC    0.810 0.78-0.84
## AUC-PR     0.900 <NA>
## AUC-PRG    0.280 <NA>

test_pred_xgb <- predict(xgb_fit, newdata = testdata)
confusionMatrix(test_pred_xgb, testdata$Outcome)

## Confusion Matrix and Statistics
##
##           Reference
## Prediction  X1  X2
##           X1 44  23
##           X2 45 185
##
##           Accuracy : 0.771
##           95% CI : (0.719, 0.8176)
##           No Information Rate : 0.7003
##           P-Value [Acc > NIR] : 0.003986
##
##           Kappa : 0.413
##
## Mcnemar's Test P-Value : 0.010877
##
##           Sensitivity : 0.4944
##           Specificity : 0.8894
##           Pos Pred Value : 0.6567
##           Neg Pred Value : 0.8043
##           Prevalence : 0.2997
##           Detection Rate : 0.1481
##           Detection Prevalence : 0.2256
##           Balanced Accuracy : 0.6919
##
##           'Positive' Class : X1
##

```



```
test_prob_xgb <- predict(xgb_fit, newdata = testdata, type="prob")
mxgb = data.frame(test_prob_xgb, testdata$Outcome)
yxgb<-evalm(mxgb)
```

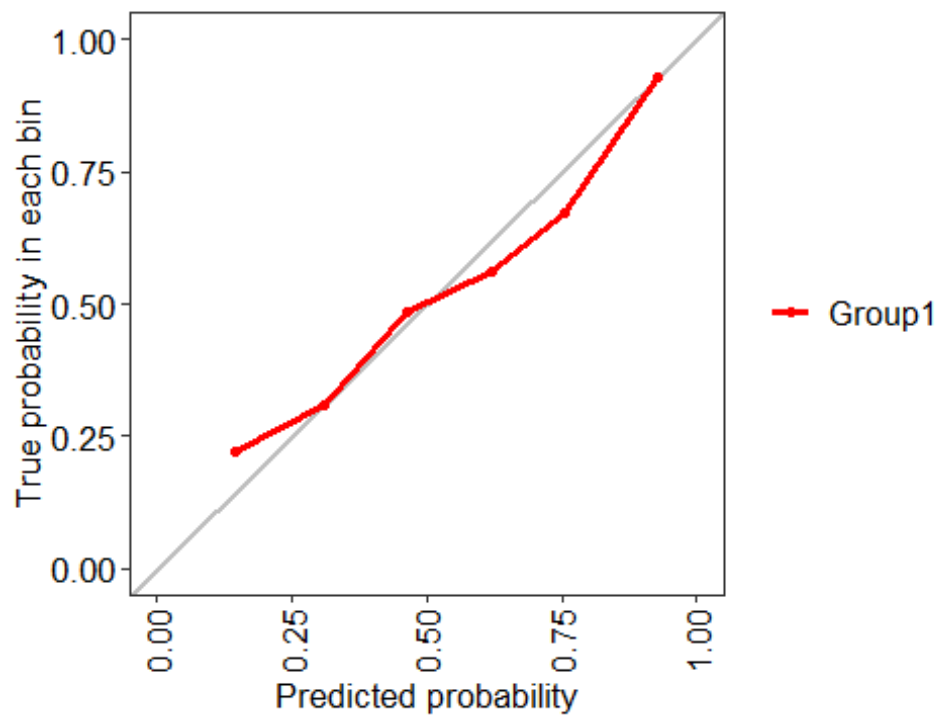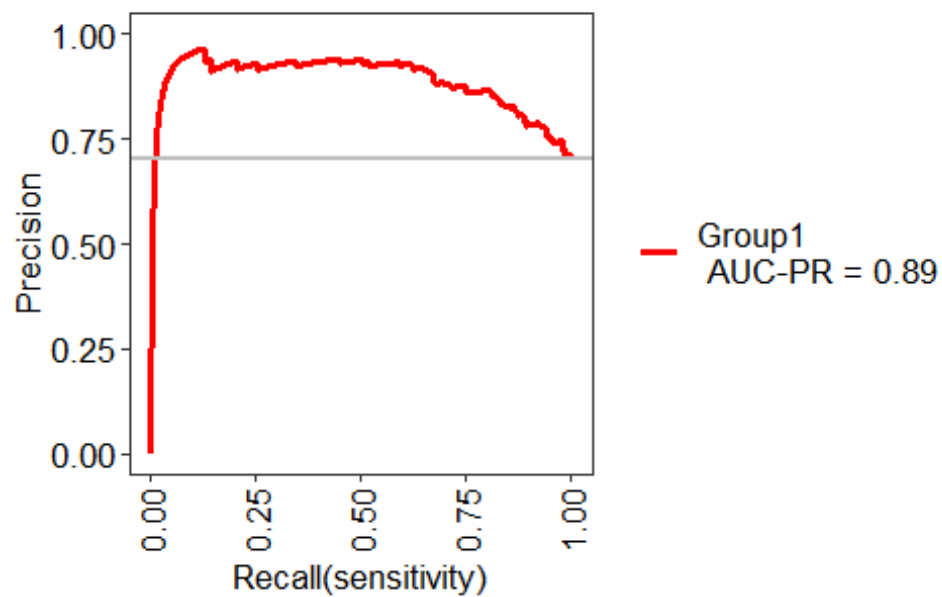

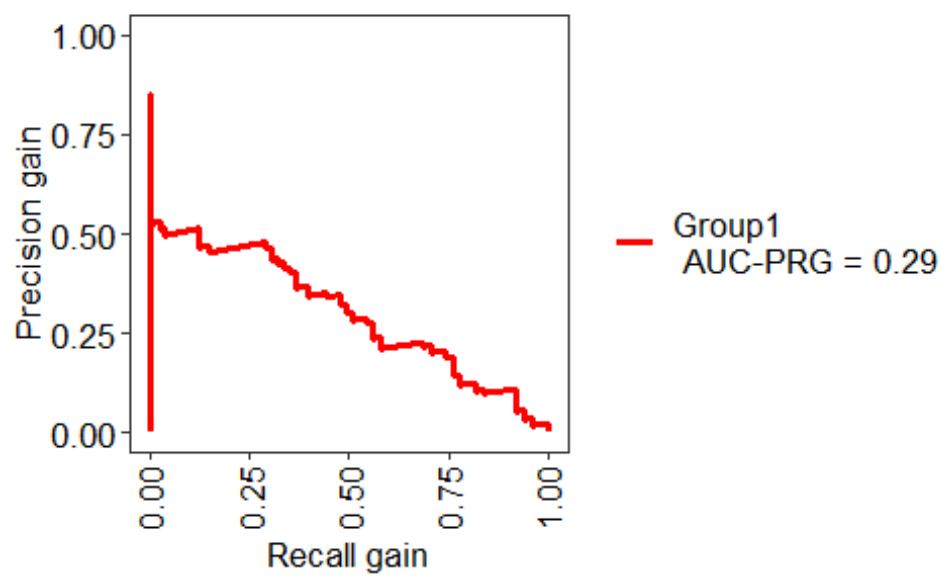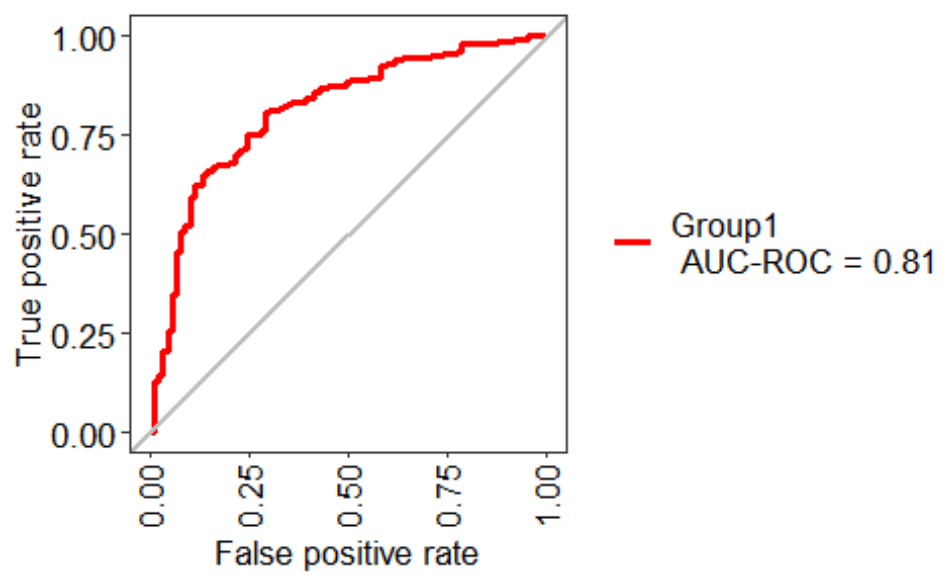

`yxgb$stdres`

```

## $Group1
##           Score      CI
## SENS      0.889 0.84-0.93
## SPEC      0.494 0.39-0.6
## MCC       0.421 <NA>
## Informedness 0.384 <NA>
## PREC      0.804 0.75-0.85
## NPV       0.657 0.54-0.76
## FPR       0.506 <NA>
## F1        0.845 <NA>
## TP        185.000 <NA>
## FP        45.000 <NA>
## TN        44.000 <NA>
## FN        23.000 <NA>
## AUC-ROC    0.810 0.76-0.86
## AUC-PR     0.890 <NA>
## AUC-PRG    0.290 <NA>

imp<-varImp(xgb_fit, scale = FALSE)
imp

## xgbTree variable importance
##
##   only 20 most important variables shown (out of 60)
##
##           Overall
## NIHSS_adm  0.181593
## Age        0.126993
## Arrival    0.052630
## RanGlu     0.050830
## PLT        0.048067
## LDL        0.046479
## SBP        0.044590
## TG         0.041516
## BUN        0.041104
## Hb         0.041096
## BMI        0.039366
## HbA1C      0.039203
## HDL        0.037616
## DBP        0.036614
## TC         0.030849
## AC         0.024639
## Cr         0.018989
## PRE_STROKE.0 0.007174
## PRE_STROKE.2 0.006317
## Side.1     0.005029

plot(imp)

```

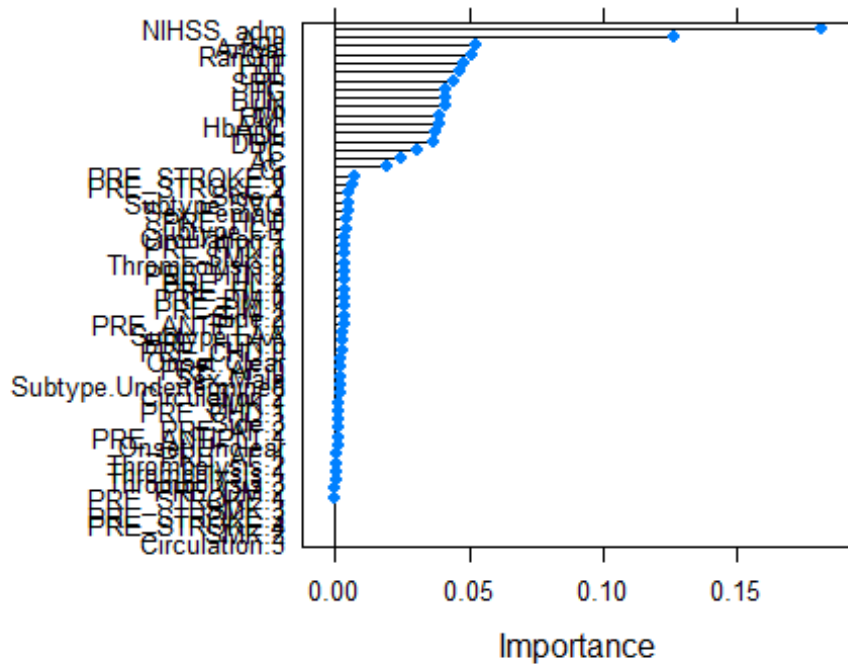

```
set.seed(seed)
svm_fit <- train(Outcome~., data = traindata, method = "svmRadial",
                 trControl=ctrl, metric=metric, tuneLength = 10)
svm_fit

## Support Vector Machines with Radial Basis Function Kernel
##
## 769 samples
## 60 predictor
## 2 classes: 'X1', 'X2'
##
## No pre-processing
## Resampling: Cross-Validated (10 fold, repeated 10 times)
## Summary of sample sizes: 691, 693, 693, 693, 692, 692, ...
## Resampling results across tuning parameters:
##
##  C          ROC          Sens          Spec
##  0.25  0.7808983  0.4439493  0.8882984
##  0.50  0.7792789  0.3826449  0.9091300
##  1.00  0.7750284  0.3722101  0.9080119
##  2.00  0.7699337  0.3684420  0.9145388
##  4.00  0.7562832  0.3404891  0.9200804
##  8.00  0.7360512  0.3188406  0.9193955
## 16.00  0.7211696  0.2944565  0.9197379
## 32.00  0.7169518  0.2866123  0.9227149
## 64.00  0.7136272  0.2917391  0.9184347
```

```
## 128.00 0.7135708 0.2921920 0.9176904
##
## Tuning parameter 'sigma' was held constant at a value of 0.02761147
## ROC was used to select the optimal model using the largest value.
## The final values used for the model were sigma = 0.02761147 and C = 0.25.
x_svm <- evalm(svm_fit)
```

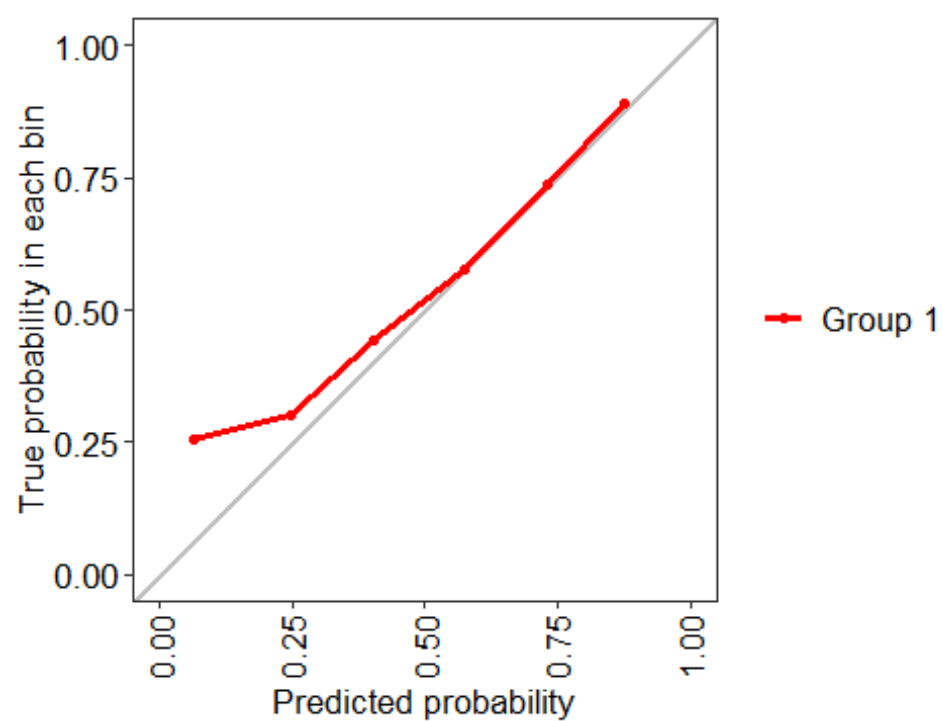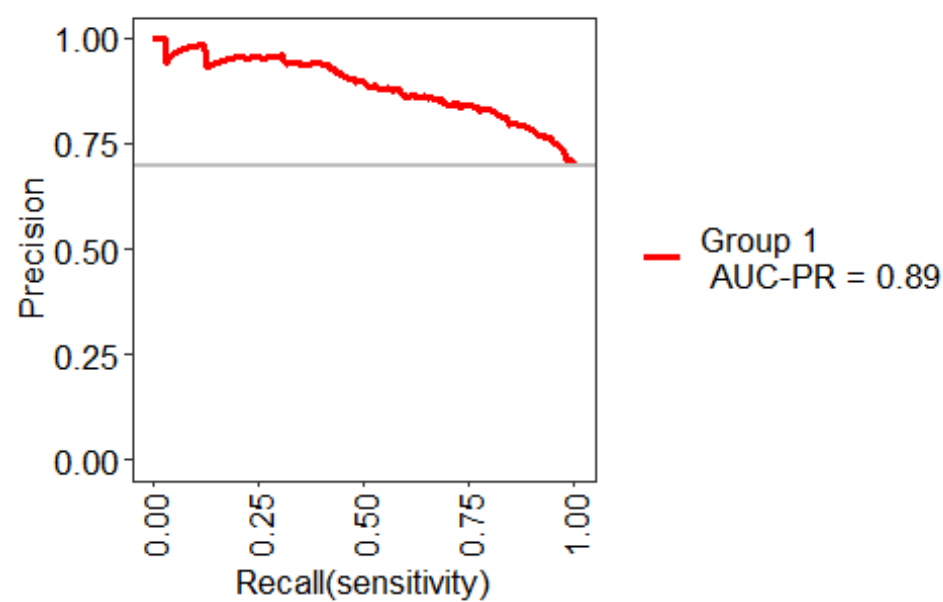

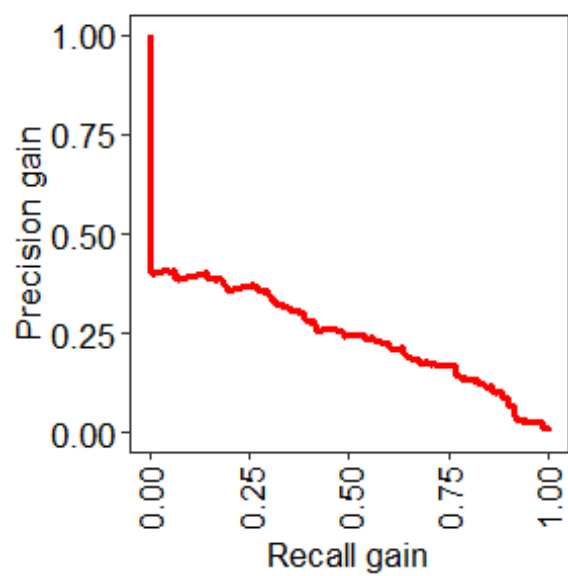

— Group 1  
AUC-PRG = 0.25

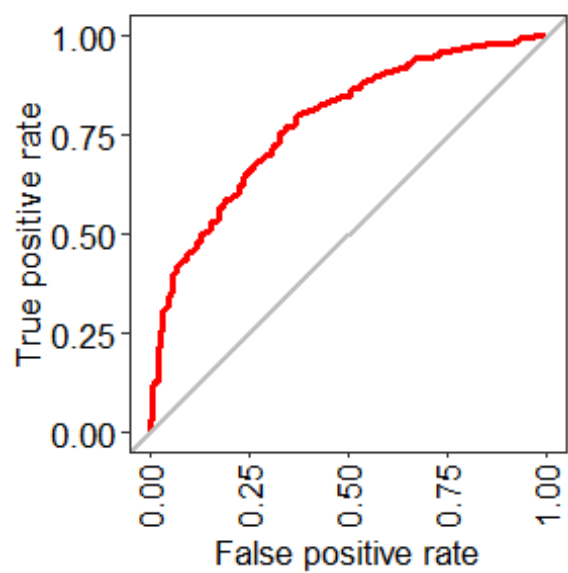

— Group 1  
AUC-ROC = 0.78

```
x_svm$stdres
```

```

## `$`Group 1`
##           Score      CI
## SENS      0.888 0.86-0.91
## SPEC      0.448 0.39-0.51
## MCC       0.377      <NA>
## Informedness 0.337      <NA>
## PREC      0.788 0.75-0.82
## NPV       0.634 0.56-0.7
## FPR       0.552      <NA>
## F1        0.835      <NA>
## TP        477.000      <NA>
## FP        128.000      <NA>
## TN        104.000      <NA>
## FN         60.000      <NA>
## AUC-ROC    0.780 0.75-0.81
## AUC-PR     0.890      <NA>
## AUC-PRG    0.250      <NA>

test_pred_svm <- predict(svm_fit, newdata = testdata)
confusionMatrix (test_pred_svm, testdata$Outcome)

## Confusion Matrix and Statistics
##
##           Reference
## Prediction  X1  X2
##           X1  50  20
##           X2  39 188
##
##           Accuracy : 0.8013
##           95% CI : (0.7514, 0.8452)
##           No Information Rate : 0.7003
##           P-Value [Acc > NIR] : 5.361e-05
##
##           Kappa : 0.4959
##
## Mcnemar's Test P-Value : 0.01911
##
##           Sensitivity : 0.5618
##           Specificity : 0.9038
##           Pos Pred Value : 0.7143
##           Neg Pred Value : 0.8282
##           Prevalence : 0.2997
##           Detection Rate : 0.1684
##           Detection Prevalence : 0.2357
##           Balanced Accuracy : 0.7328
##
##           'Positive' Class : X1
##

```



```
test_prob_svm <- predict(svm_fit, newdata = testdata, type="prob")
msvm = data.frame(test_prob_svm, testdata$Outcome)
ysvm<-evalm(msvm)
```

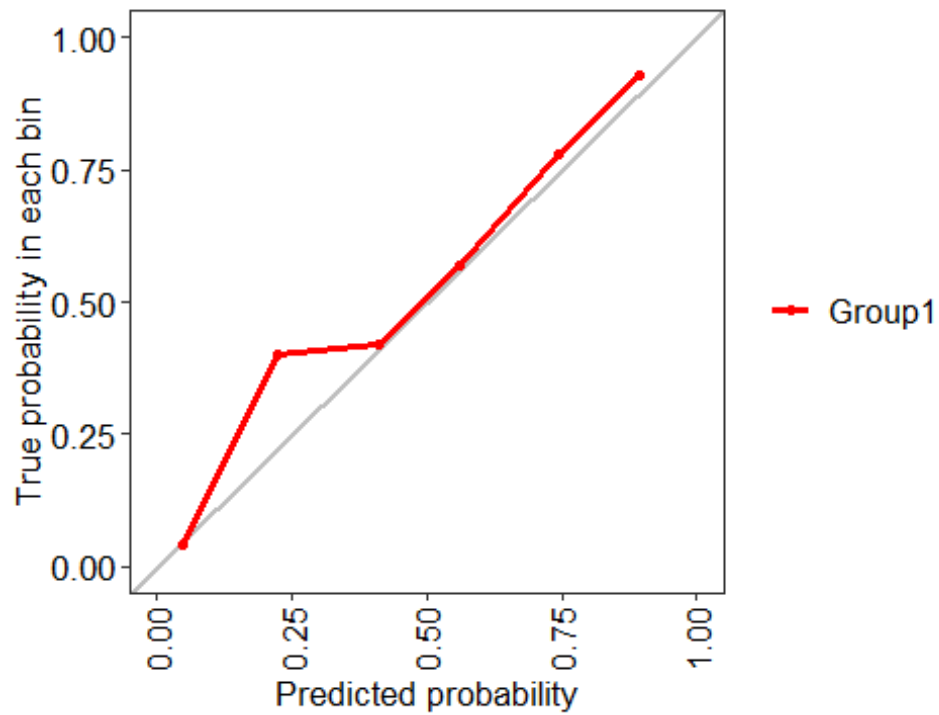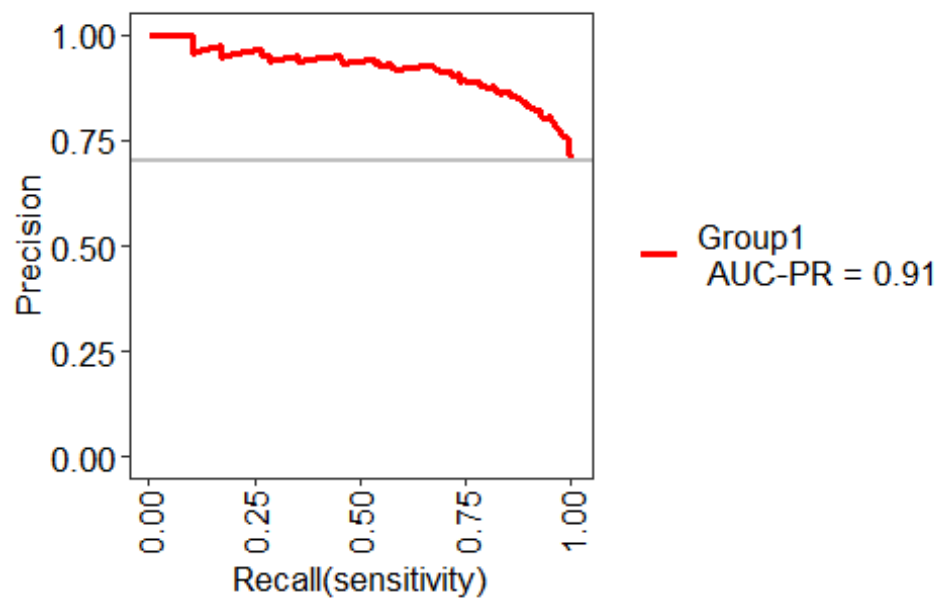

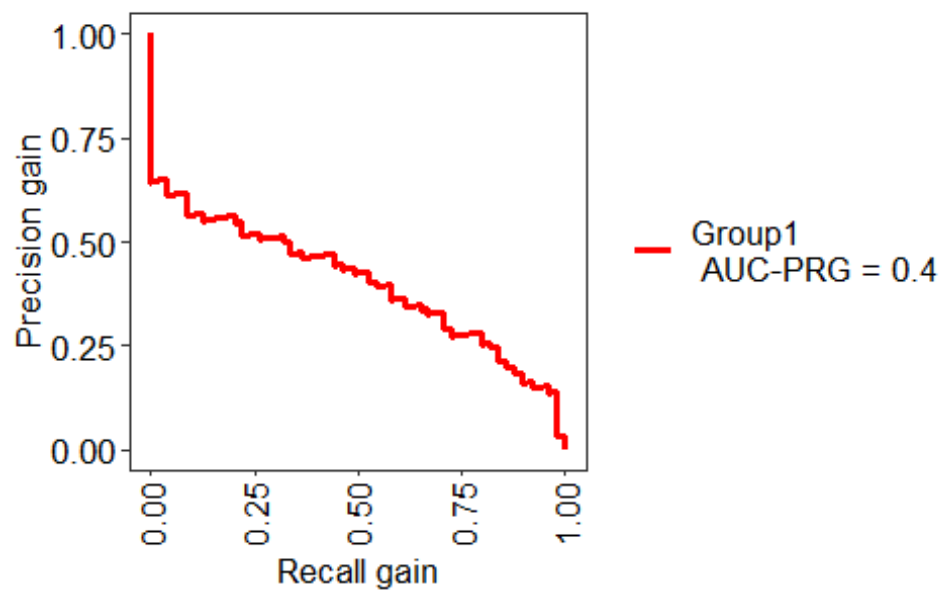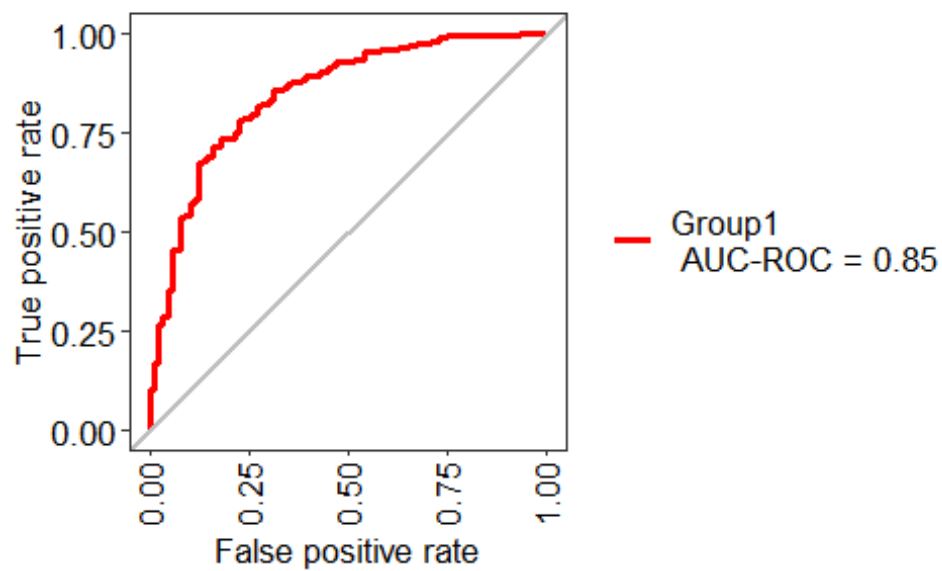

`ysvm$stdres`

```

## $Group1
##           Score      CI
## SENS      0.904 0.86-0.94
## SPEC      0.562 0.46-0.66
## MCC       0.503    <NA>
## Informedness 0.466    <NA>
## PREC      0.828 0.77-0.87
## NPV       0.714 0.6-0.81
## FPR       0.438    <NA>
## F1        0.864    <NA>
## TP        188.000    <NA>
## FP        39.000    <NA>
## TN        50.000    <NA>
## FN        20.000    <NA>
## AUC-ROC    0.850 0.81-0.89
## AUC-PR     0.910    <NA>
## AUC-PRG    0.400    <NA>

set.seed(seed)
knn_fit <- train(Outcome~., data = traindata, method = "knn",
                 trControl=ctrl, metric=metric, tuneLength = 50)
knn_fit

## k-Nearest Neighbors
##
## 769 samples
## 60 predictor
## 2 classes: 'X1', 'X2'
##
## No pre-processing
## Resampling: Cross-Validated (10 fold, repeated 10 times)
## Summary of sample sizes: 691, 693, 693, 693, 692, 692, ...
## Resampling results across tuning parameters:
##
##  k    ROC      Sens      Spec
##   5  0.6366825  0.21929348  0.8984906
##   7  0.6452075  0.20943841  0.9301817
##   9  0.6673790  0.19773551  0.9450664
##  11  0.6797653  0.18262681  0.9558910
##  13  0.6881678  0.16121377  0.9689133
##  15  0.6956531  0.15681159  0.9709539
##  17  0.7019509  0.15804348  0.9791405
##  19  0.7044948  0.15163043  0.9821279
##  21  0.7065721  0.14262681  0.9836094
##  23  0.7108257  0.13311594  0.9845353
##  25  0.7177049  0.11764493  0.9850908
##  27  0.7176241  0.11376812  0.9843431
##  29  0.7182129  0.11375000  0.9837945
##  31  0.7155400  0.10994565  0.9837876

```

```
## 33 0.7177519 0.10173913 0.9849092
## 35 0.7225859 0.09916667 0.9850943
## 37 0.7236358 0.09916667 0.9852795
## 39 0.7249821 0.09739130 0.9865828
## 41 0.7250602 0.09396739 0.9873166
## 43 0.7252732 0.09226449 0.9878791
## 45 0.7250579 0.08797101 0.9873201
## 47 0.7242378 0.08534420 0.9862089
## 49 0.7222957 0.08407609 0.9856464
## 51 0.7218365 0.08231884 0.9854647
## 53 0.7213997 0.08059783 0.9856464
## 55 0.7214036 0.07844203 0.9856464
## 57 0.7206454 0.07802536 0.9865793
## 59 0.7197855 0.07760870 0.9878791
## 61 0.7202359 0.07677536 0.9882495
## 63 0.7211058 0.07460145 0.9884347
## 65 0.7215769 0.07201087 0.9888050
## 67 0.7244282 0.07115942 0.9889937
## 69 0.7281901 0.07117754 0.9897379
## 71 0.7304029 0.06775362 0.9902970
## 73 0.7326776 0.06900362 0.9906709
## 75 0.7336795 0.06900362 0.9904857
## 77 0.7333991 0.06599638 0.9908595
## 79 0.7347630 0.06684783 0.9910447
## 81 0.7360292 0.06469203 0.9921698
## 83 0.7381157 0.06340580 0.9934696
## 85 0.7375543 0.05992754 0.9936583
## 87 0.7372151 0.06125000 0.9944060
## 89 0.7354903 0.05909420 0.9947834
## 91 0.7358800 0.05865942 0.9955311
## 93 0.7343451 0.05692029 0.9951572
## 95 0.7331492 0.05393116 0.9960832
## 97 0.7314851 0.05304348 0.9960867
## 99 0.7317255 0.04916667 0.9962753
## 101 0.7324770 0.04742754 0.9970196
## 103 0.7319719 0.04570652 0.9973934
```

```
##
```

```
## ROC was used to select the optimal model using the largest value.
```

```
## The final value used for the model was k = 83.
```

```
x_knn <- evalm(knn_fit)
```

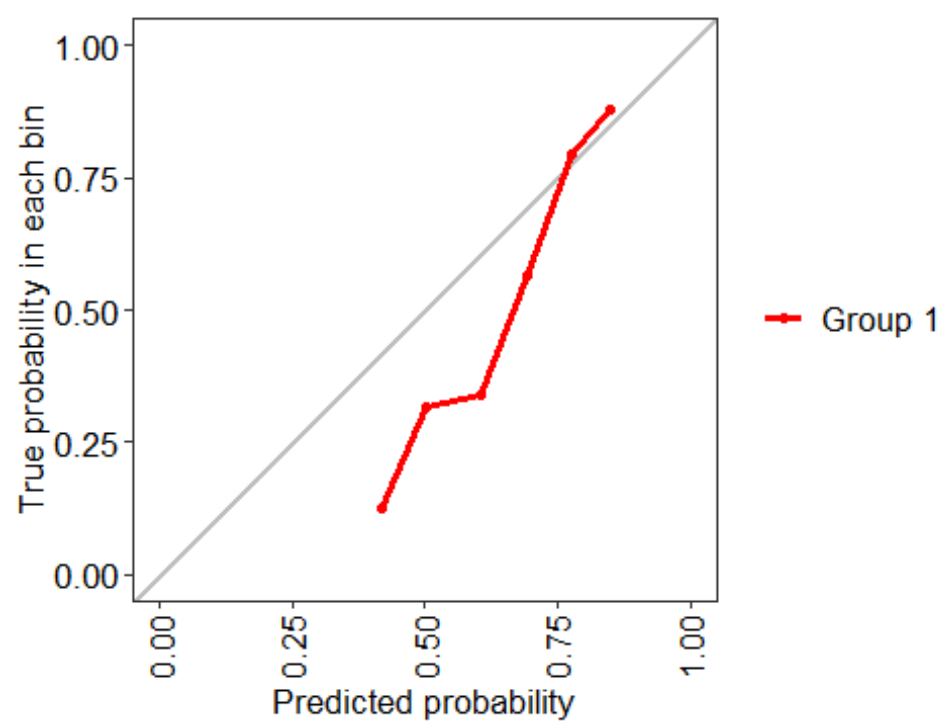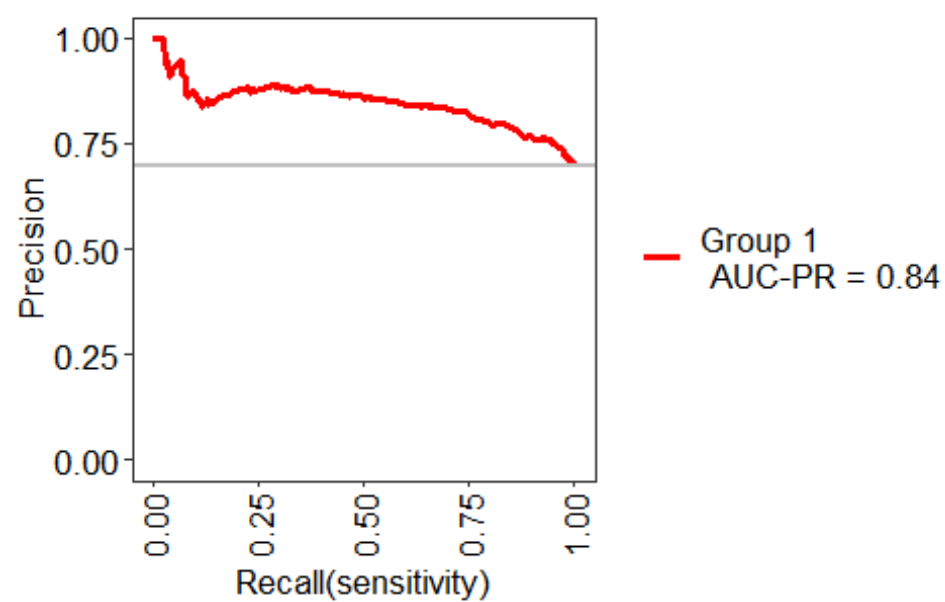

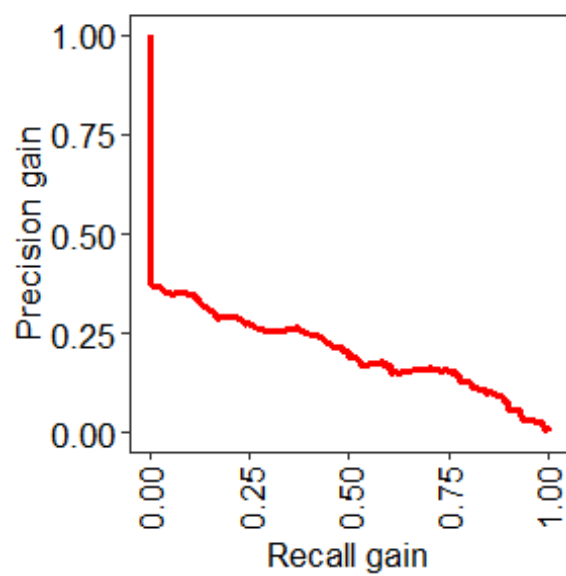

Group 1  
AUC-PRG = 0.21

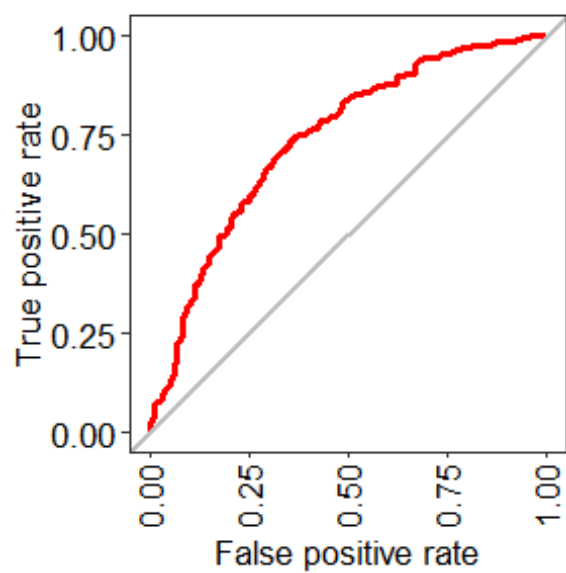

Group 1  
AUC-ROC = 0.74

x\_knn\$stdres

```

## `$`Group 1`
##           Score      CI
## SENS      0.993    0.98-1
## SPEC      0.060  0.04-0.1
## MCC       0.161    <NA>
## Informedness 0.053    <NA>
## PREC      0.710  0.68-0.74
## NPV       0.778  0.55-0.91
## FPR       0.940    <NA>
## F1        0.828    <NA>
## TP        533.000    <NA>
## FP        218.000    <NA>
## TN        14.000    <NA>
## FN         4.000    <NA>
## AUC-ROC    0.740  0.7-0.78
## AUC-PR     0.840    <NA>
## AUC-PRG    0.210    <NA>

test_pred_knn <- predict(knn_fit, newdata = testdata)
confusionMatrix(test_pred_knn, testdata$Outcome)

## Confusion Matrix and Statistics
##
##           Reference
## Prediction X1 X2
##           X1  9  1
##           X2 80 207
##
##           Accuracy : 0.7273
##           95% CI : (0.6728, 0.7771)
##           No Information Rate : 0.7003
##           P-Value [Acc > NIR] : 0.1713
##
##           Kappa : 0.1291
##
## Mcnemar's Test P-Value : <2e-16
##
##           Sensitivity : 0.10112
##           Specificity : 0.99519
##           Pos Pred Value : 0.90000
##           Neg Pred Value : 0.72125
##           Prevalence : 0.29966
##           Detection Rate : 0.03030
##           Detection Prevalence : 0.03367
##           Balanced Accuracy : 0.54816
##
##           'Positive' Class : X1
##

```

```
test_prob_knn <- predict(knn_fit, newdata = testdata, type="prob")
mknn = data.frame(test_prob_knn, testdata$Outcome)
yknn<-evalm(mknn)
```

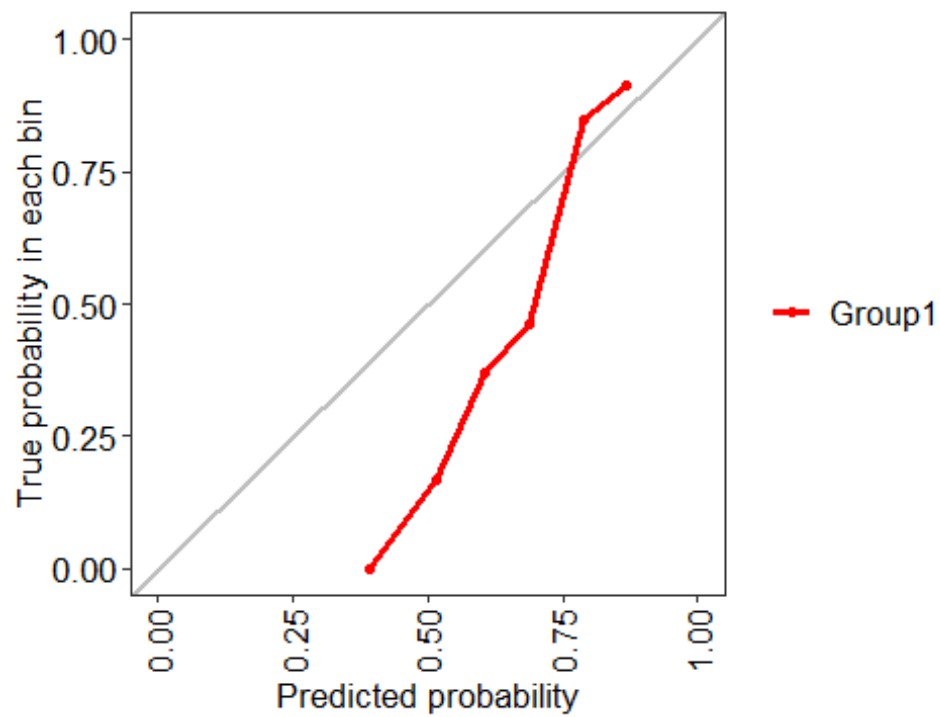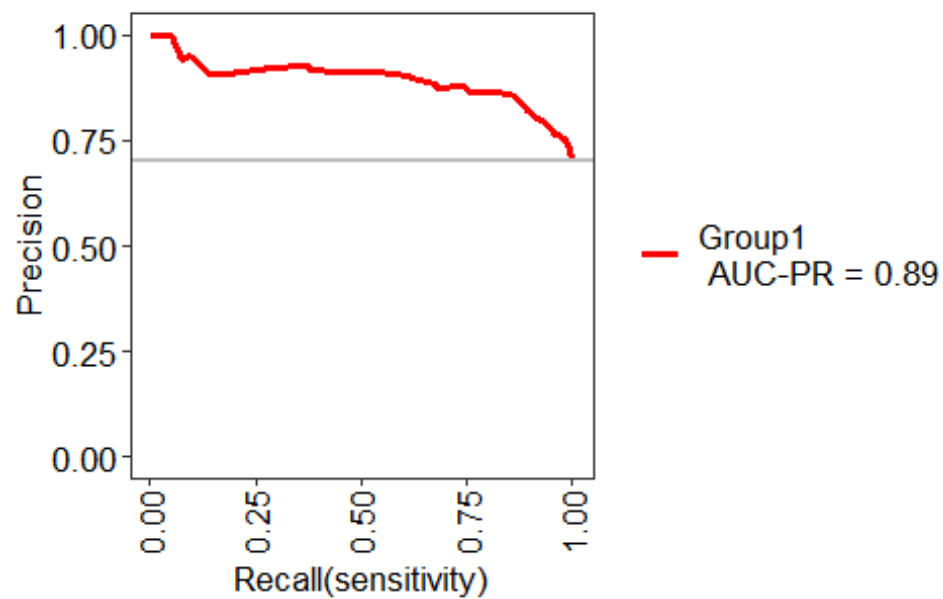



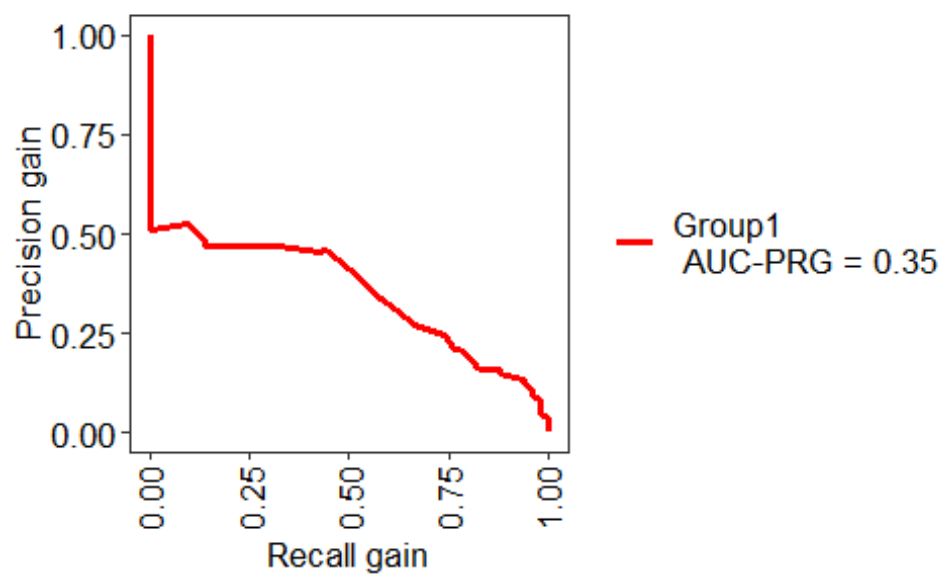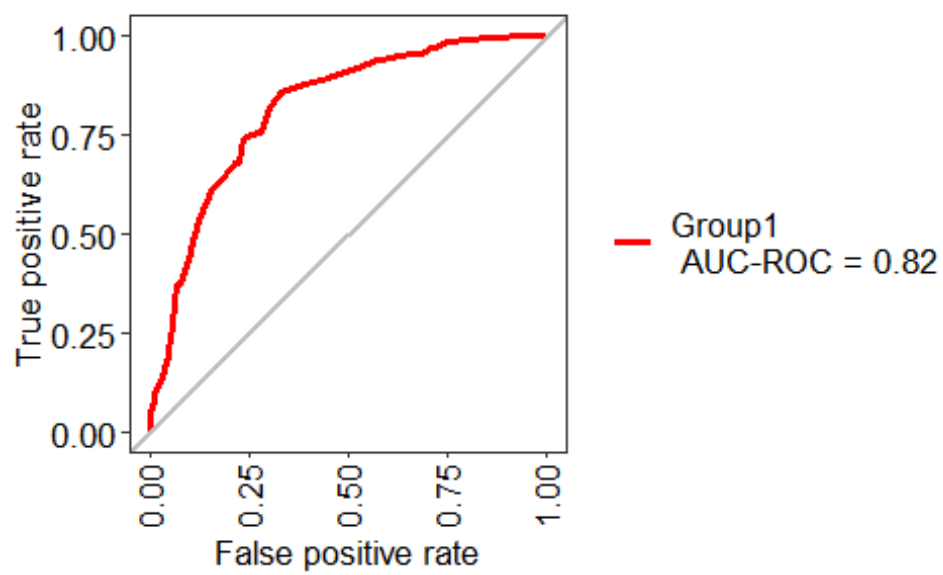

yknn\$stdres

```

## $Group1
##           Score      CI
## SENS      0.995    0.97-1
## SPEC      0.101 0.05-0.18
## MCC       0.245    <NA>
## Informedness 0.096    <NA>
## PREC      0.721 0.67-0.77
## NPV       0.900 0.6-0.98
## FPR       0.899    <NA>
## F1        0.836    <NA>
## TP        207.000    <NA>
## FP        80.000    <NA>
## TN         9.000    <NA>
## FN         1.000    <NA>
## AUC-ROC    0.820 0.77-0.87
## AUC-PR     0.890    <NA>
## AUC-PRG    0.350    <NA>

set.seed(seed)
lr_fit<-train(Outcome~., data = traindata, method = "regLogistic",
              trControl=ctrl, metric=metric, tuneLength=5, verbose=FALSE)
lr_fit

## Regularized Logistic Regression
##
## 769 samples
## 60 predictor
## 2 classes: 'X1', 'X2'
##
## No pre-processing
## Resampling: Cross-Validated (10 fold, repeated 10 times)
## Summary of sample sizes: 691, 693, 693, 693, 692, 692, ...
## Resampling results across tuning parameters:
##
## cost loss      epsilon ROC      Sens      Spec
## 0.25 L1        1e-04 0.7704150 0.3718297 0.9232914
## 0.25 L1        1e-03 0.7708139 0.3705435 0.9232879
## 0.25 L1        1e-02 0.7712565 0.3718297 0.9234696
## 0.25 L1        1e-01 0.7696067 0.3705978 0.9258875
## 0.25 L1        1e+00 0.7463236 0.3392935 0.9244514
## 0.25 L2_dual   1e-04 0.7559086 0.3821558 0.9117470
## 0.25 L2_dual   1e-03 0.7559086 0.3821558 0.9117470
## 0.25 L2_dual   1e-02 0.7559094 0.3821558 0.9117470
## 0.25 L2_dual   1e-01 0.7559179 0.3821558 0.9117470
## 0.25 L2_dual   1e+00 0.7560718 0.3821739 0.9126695
## 0.25 L2_primal 1e-04 0.7559327 0.3821558 0.9117470
## 0.25 L2_primal 1e-03 0.7559813 0.3821558 0.9117470
## 0.25 L2_primal 1e-02 0.7558863 0.3825906 0.9117470
## 0.25 L2_primal 1e-01 0.7557225 0.3804529 0.9128651

```

|    |      |           |       |           |           |           |
|----|------|-----------|-------|-----------|-----------|-----------|
| ## | 0.25 | L2_primal | 1e+00 | 0.7604857 | 0.3232428 | 0.9343047 |
| ## | 0.50 | L1        | 1e-04 | 0.7640213 | 0.3774094 | 0.9165723 |
| ## | 0.50 | L1        | 1e-03 | 0.7638715 | 0.3778442 | 0.9171349 |
| ## | 0.50 | L1        | 1e-02 | 0.7640397 | 0.3795652 | 0.9173096 |
| ## | 0.50 | L1        | 1e-01 | 0.7654522 | 0.3735688 | 0.9232949 |
| ## | 0.50 | L1        | 1e+00 | 0.7470772 | 0.3504529 | 0.9161880 |
| ## | 0.50 | L2_dual   | 1e-04 | 0.7534142 | 0.3878442 | 0.9080049 |
| ## | 0.50 | L2_dual   | 1e-03 | 0.7534142 | 0.3878442 | 0.9080049 |
| ## | 0.50 | L2_dual   | 1e-02 | 0.7533980 | 0.3878442 | 0.9080049 |
| ## | 0.50 | L2_dual   | 1e-01 | 0.7534859 | 0.3878442 | 0.9081901 |
| ## | 0.50 | L2_dual   | 1e+00 | 0.7532163 | 0.3895833 | 0.9068938 |
| ## | 0.50 | L2_primal | 1e-04 | 0.7534062 | 0.3878442 | 0.9080049 |
| ## | 0.50 | L2_primal | 1e-03 | 0.7534364 | 0.3874094 | 0.9080049 |
| ## | 0.50 | L2_primal | 1e-02 | 0.7534502 | 0.3878261 | 0.9076345 |
| ## | 0.50 | L2_primal | 1e-01 | 0.7537629 | 0.3869565 | 0.9078267 |
| ## | 0.50 | L2_primal | 1e+00 | 0.7604543 | 0.3262500 | 0.9333683 |
| ## | 1.00 | L1        | 1e-04 | 0.7566451 | 0.3869565 | 0.9085744 |
| ## | 1.00 | L1        | 1e-03 | 0.7568508 | 0.3865399 | 0.9083892 |
| ## | 1.00 | L1        | 1e-02 | 0.7581234 | 0.3891486 | 0.9098777 |
| ## | 1.00 | L1        | 1e-01 | 0.7581455 | 0.3826812 | 0.9145353 |
| ## | 1.00 | L1        | 1e+00 | 0.7383599 | 0.3434601 | 0.9191824 |
| ## | 1.00 | L2_dual   | 1e-04 | 0.7511148 | 0.3917029 | 0.9061495 |
| ## | 1.00 | L2_dual   | 1e-03 | 0.7511148 | 0.3917029 | 0.9061495 |
| ## | 1.00 | L2_dual   | 1e-02 | 0.7511386 | 0.3917029 | 0.9061495 |
| ## | 1.00 | L2_dual   | 1e-01 | 0.7511382 | 0.3921377 | 0.9059644 |
| ## | 1.00 | L2_dual   | 1e+00 | 0.7505362 | 0.3925543 | 0.9063277 |
| ## | 1.00 | L2_primal | 1e-04 | 0.7511220 | 0.3917029 | 0.9061495 |
| ## | 1.00 | L2_primal | 1e-03 | 0.7511311 | 0.3917029 | 0.9059644 |
| ## | 1.00 | L2_primal | 1e-02 | 0.7511814 | 0.3921377 | 0.9057757 |
| ## | 1.00 | L2_primal | 1e-01 | 0.7513556 | 0.3886957 | 0.9065269 |
| ## | 1.00 | L2_primal | 1e+00 | 0.7603185 | 0.3271196 | 0.9326240 |
| ## | 2.00 | L1        | 1e-04 | 0.7527723 | 0.3912681 | 0.9066981 |
| ## | 2.00 | L1        | 1e-03 | 0.7529073 | 0.3912681 | 0.9067016 |
| ## | 2.00 | L1        | 1e-02 | 0.7528581 | 0.3908152 | 0.9065094 |
| ## | 2.00 | L1        | 1e-01 | 0.7529134 | 0.3809783 | 0.9098777 |
| ## | 2.00 | L1        | 1e+00 | 0.7350363 | 0.3613406 | 0.9121174 |
| ## | 2.00 | L2_dual   | 1e-04 | 0.7490226 | 0.3942935 | 0.9048498 |
| ## | 2.00 | L2_dual   | 1e-03 | 0.7490071 | 0.3942935 | 0.9048498 |
| ## | 2.00 | L2_dual   | 1e-02 | 0.7489907 | 0.3942935 | 0.9048498 |
| ## | 2.00 | L2_dual   | 1e-01 | 0.7490551 | 0.3942935 | 0.9052236 |
| ## | 2.00 | L2_dual   | 1e+00 | 0.7490489 | 0.3981522 | 0.9042942 |
| ## | 2.00 | L2_primal | 1e-04 | 0.7490068 | 0.3942935 | 0.9048498 |
| ## | 2.00 | L2_primal | 1e-03 | 0.7491439 | 0.3942935 | 0.9048532 |
| ## | 2.00 | L2_primal | 1e-02 | 0.7493408 | 0.3942935 | 0.9052201 |
| ## | 2.00 | L2_primal | 1e-01 | 0.7508424 | 0.3921196 | 0.9037317 |
| ## | 2.00 | L2_primal | 1e+00 | 0.7603516 | 0.3275543 | 0.9324389 |
| ## | 4.00 | L1        | 1e-04 | 0.7502136 | 0.3951449 | 0.9039133 |
| ## | 4.00 | L1        | 1e-03 | 0.7501890 | 0.3947101 | 0.9040985 |
| ## | 4.00 | L1        | 1e-02 | 0.7506978 | 0.3951449 | 0.9024284 |

```

## 4.00 L1 1e-01 0.7501313 0.3808333 0.9052306
## 4.00 L1 1e+00 0.7286558 0.3478804 0.9078267
## 4.00 L2_dual 1e-04 0.7470167 0.3960145 0.9027952
## 4.00 L2_dual 1e-03 0.7470167 0.3960145 0.9027952
## 4.00 L2_dual 1e-02 0.7470328 0.3960145 0.9027952
## 4.00 L2_dual 1e-01 0.7470640 0.3960145 0.9027918
## 4.00 L2_dual 1e+00 0.7470835 0.3981341 0.9015059
## 4.00 L2_primal 1e-04 0.7470330 0.3960145 0.9027952
## 4.00 L2_primal 1e-03 0.7471897 0.3960145 0.9031656
## 4.00 L2_primal 1e-02 0.7476581 0.3951449 0.9035430
## 4.00 L2_primal 1e-01 0.7501897 0.3938587 0.9022432
## 4.00 L2_primal 1e+00 0.7603684 0.3275543 0.9324389
##
## ROC was used to select the optimal model using the largest value.
## The final values used for the model were cost = 0.25, loss = L1 and epsilon
## = 0.01.
xlr <- evalm(lr_fit)

```

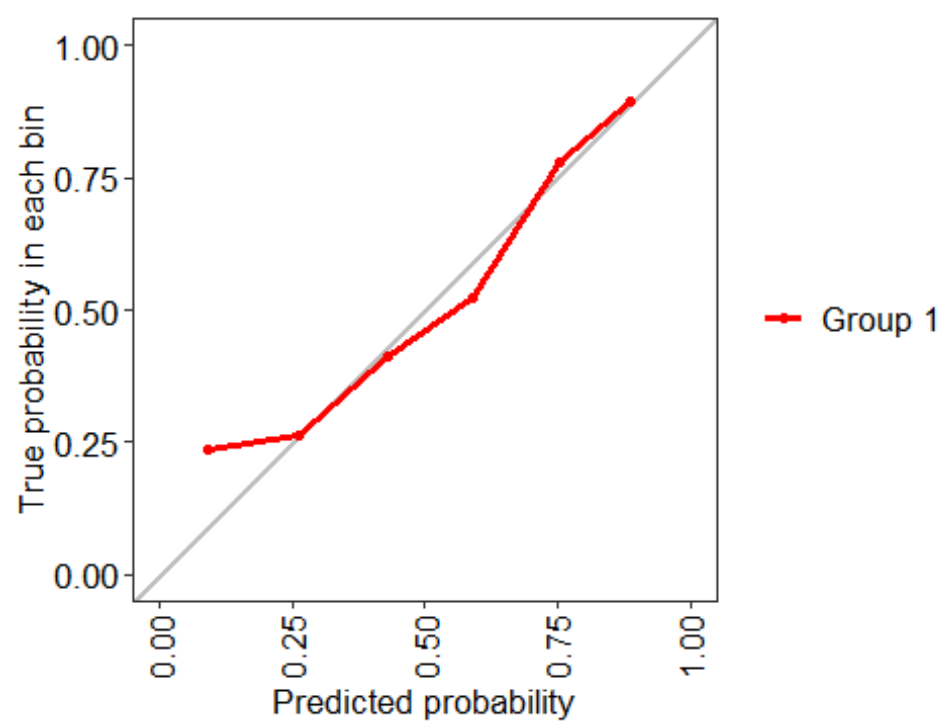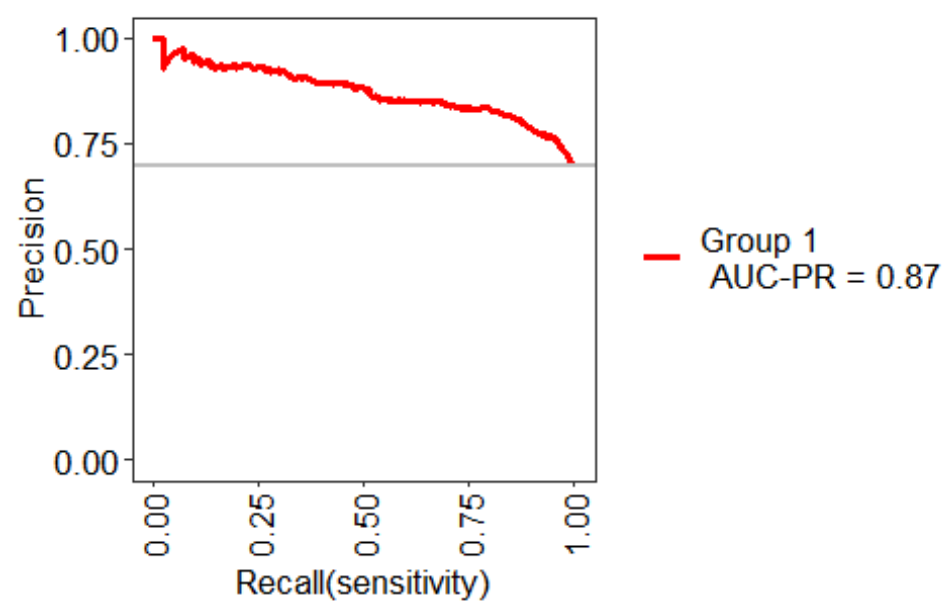

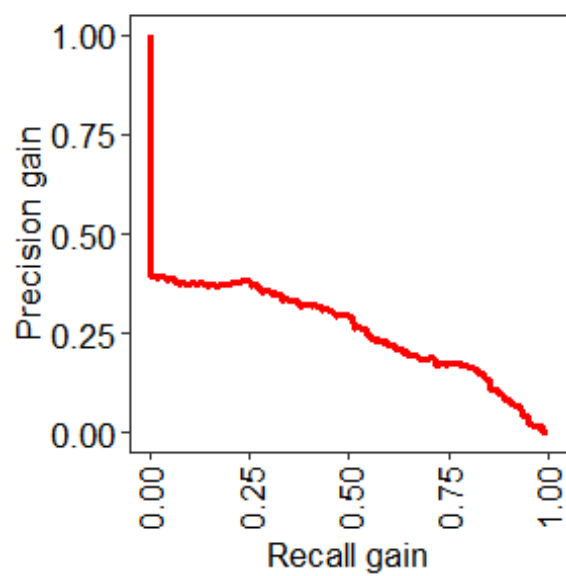

Group 1  
AUC-PRG = 0.26

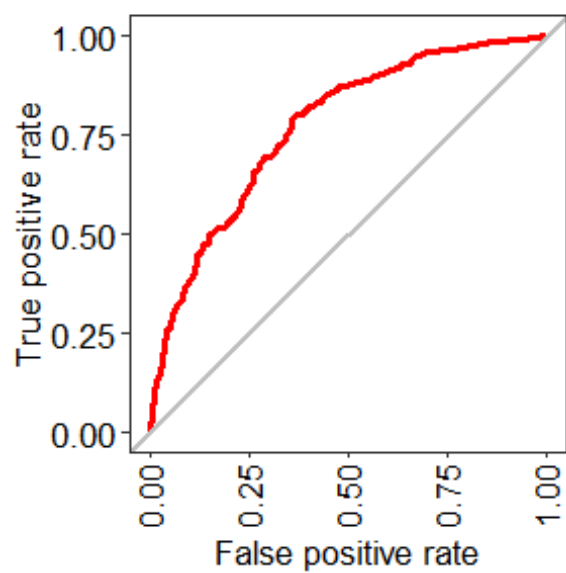

Group 1  
AUC-ROC = 0.77

```
xlr$stdres
```

```

## `$`Group 1`
##           Score      CI
## SENS      0.924  0.9-0.94
## SPEC      0.366  0.31-0.43
## MCC       0.360      <NA>
## Informedness 0.290      <NA>
## PREC      0.771  0.74-0.8
## NPV       0.675  0.59-0.75
## FPR       0.634      <NA>
## F1        0.841      <NA>
## TP        496.000      <NA>
## FP        147.000      <NA>
## TN        85.000      <NA>
## FN        41.000      <NA>
## AUC-ROC    0.770  0.74-0.8
## AUC-PR     0.870      <NA>
## AUC-PRG    0.260      <NA>

test_pred_lr <- predict(lr_fit, newdata = testdata)
confusionMatrix(test_pred_lr, testdata$Outcome)

## Confusion Matrix and Statistics
##
##           Reference
## Prediction  X1  X2
##           X1  38  12
##           X2  51 196
##
##           Accuracy : 0.7879
##           95% CI : (0.7369, 0.833)
##           No Information Rate : 0.7003
##           P-Value [Acc > NIR] : 0.0004396
##
##           Kappa : 0.4222
##
## Mcnemar's Test P-Value : 1.688e-06
##
##           Sensitivity : 0.4270
##           Specificity : 0.9423
##           Pos Pred Value : 0.7600
##           Neg Pred Value : 0.7935
##           Prevalence : 0.2997
##           Detection Rate : 0.1279
##           Detection Prevalence : 0.1684
##           Balanced Accuracy : 0.6846
##
##           'Positive' Class : X1
##

```

```
test_prob_lr <- predict(lr_fit, newdata = testdata, type="prob")
mlr = data.frame(test_prob_lr, testdata$Outcome)
ylr<-evalm(mlr)
```

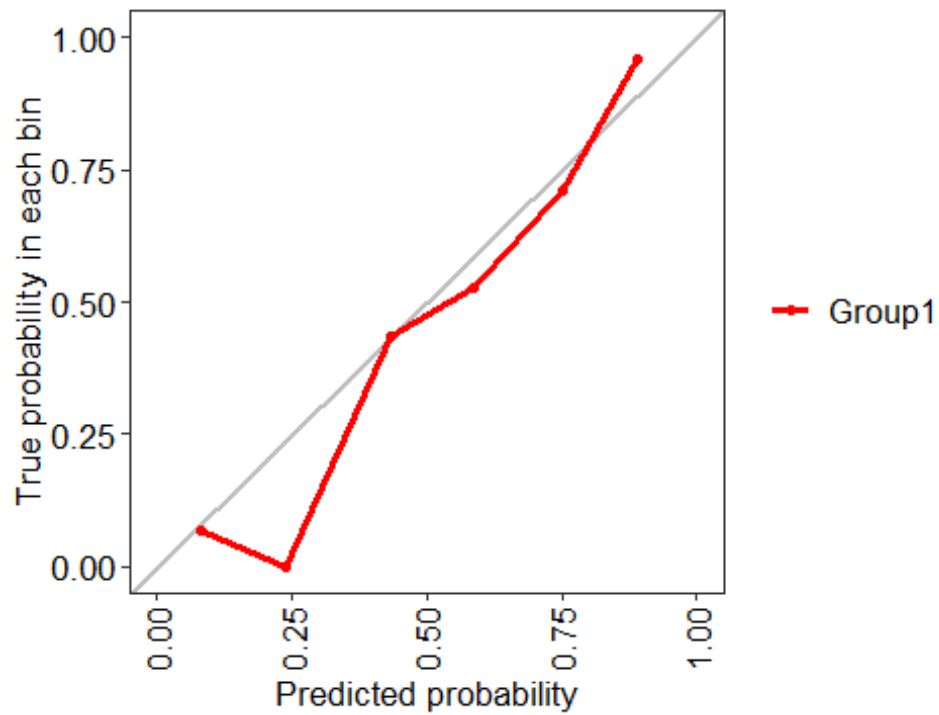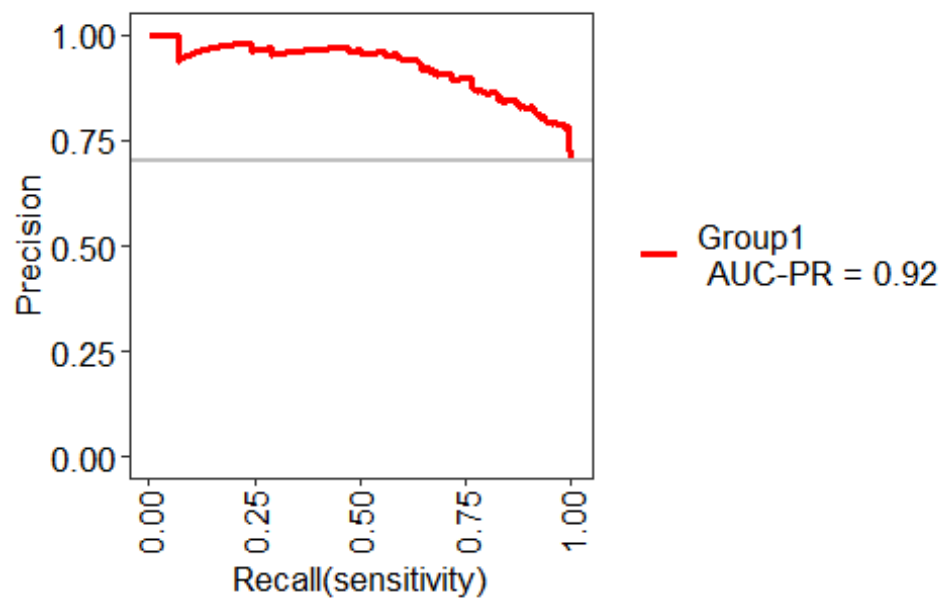



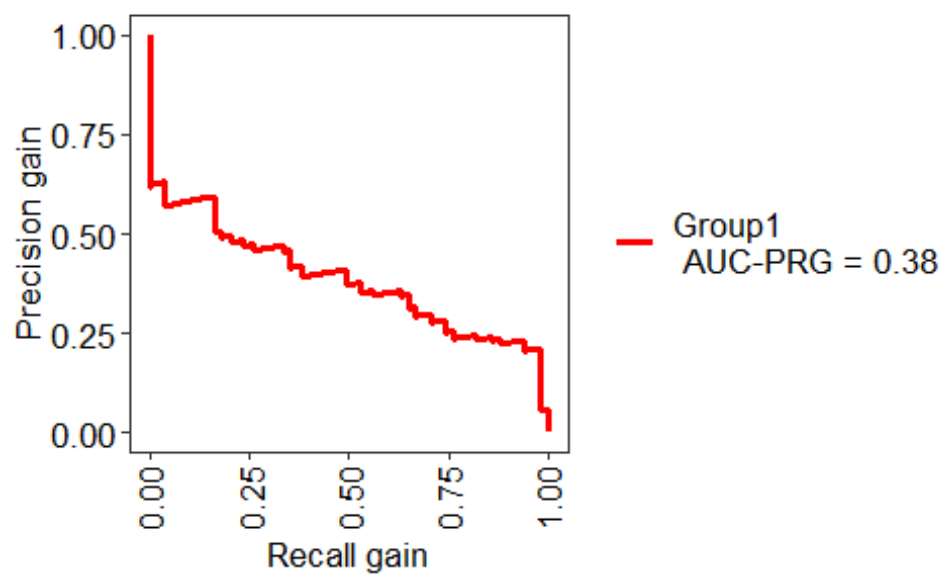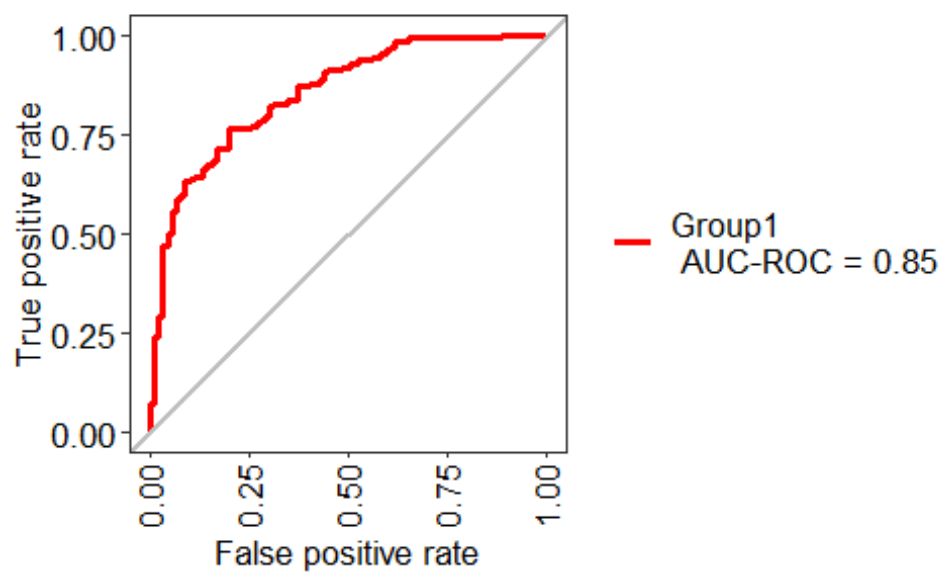

```
ylr$stdres
```

```
## $Group1
##          Score      CI
## SENS      0.942 0.9-0.97
## SPEC      0.427 0.33-0.53
## MCC        0.452    <NA>
## Informedness 0.369    <NA>
## PREC      0.794 0.74-0.84
## NPV       0.760 0.63-0.86
## FPR       0.573    <NA>
## F1        0.862    <NA>
## TP        196.000    <NA>
## FP        51.000    <NA>
## TN        38.000    <NA>
## FN        12.000    <NA>
## AUC-ROC    0.850 0.81-0.89
## AUC-PR     0.920    <NA>
## AUC-PRG    0.380    <NA>
```
