# Supplementary material for: Machine Learning-Based Three-Month Outcome Prediction in Acute Ischemic Stroke: A Single Cerebrovascular-Specialty Hospital Study in South Korea
Source: MDPI journal article supplement (doi:10.3390/diagnostics11101909), 2021-10-15
Supplement: s1 [file s1]

**Supplementary Table S1.** Optimal training model of each machine learning algorithm.

| Algorithm | Balancing | Optimal hyperparameters                                                                                            |
|-----------|-----------|--------------------------------------------------------------------------------------------------------------------|
| RLR       | SMOTE     | loss = L1, cost = 0.25, epsilon = 0.01                                                                             |
| SVM       | None      | sigma = 0.02761147, C = 0.25                                                                                       |
| RF        | ADASYN    | ntree = 1500, mtry = 8                                                                                             |
| KNN       | None      | k (neighbors) = 83                                                                                                 |
| XGB       | None      | nrounds = 500, max_depth = 6, eta = 0.01, gamma = 0, colsample_bytree = 0.6, min_child_weight = 1, subsample = 0.8 |

*RLR* regularized logistic regression, *SVM* support vector machines, *RF* random forest, *KNN* k-nearest neighbors, *XGB* extreme gradient boosting, *SMOTE* synthetic minority oversampling technique, *ADASYN* adaptive synthetic

**Supplementary Table S2.** Confusion matrix.

| Algorithm | Prediction  | Reference |             |
|-----------|-------------|-----------|-------------|
|           |             | Favorable | Unfavorable |
| RLR       | Favorable   | 172       | 28          |
|           | Unfavorable | 36        | 61          |
| SVM       | Favorable   | 188       | 39          |
|           | Unfavorable | 20        | 50          |
| RF        | Favorable   | 183       | 42          |
|           | Unfavorable | 25        | 47          |
| KNN       | Favorable   | 207       | 80          |
|           | Unfavorable | 1         | 9           |
| XGB       | Favorable   | 185       | 45          |
|           | Unfavorable | 23        | 44          |

*RLR* regularized logistic regression, *SVM* support vector machines, *RF* random forest, *KNN* k-nearest neighbors, *XGB* extreme gradient boosting
