# Supplementary material for: Machine Learning-Based Three-Month Outcome Prediction in Acute Ischemic Stroke: A Single Cerebrovascular-Specialty Hospital Study in South Korea
Source: MDPI journal article supplement (doi:10.3390/diagnostics11101909), 2021-10-15
Supplement: s1 [file s1]

## **Supplementary Document S1. Variable definitions and measurements**

(According to the Korean Stroke Registry Guideline version 1.0<sup>1</sup>)

### **Personal factors**

1. Age (numerical): Automatically calculated after entering birthday.
2. Sex (categorical): simply fill-up
3. Body mass index (numerical)
  - Automatically calculated after entering height and weight.
  - Write down known height and weight, or measure and record if they are not known.
4. Abdominal circumference (numerical)
  - Position: standing with feet apart 25–30 cm apart while exhaling in a comfortable standing position, evenly distribute weight.
  - Measure at the midpoint between the lower ribs and the upper iliac bones.

### **Personal factors**

1. Age (numerical): Automatically calculated after entering birthday.
2. Sex (categorical): simply fill-up
3. Body mass index (numerical)
  - Automatically calculated after entering height and weight.
  - Write down known height and weight, or measure and record if they are not known.
4. Abdominal circumference (numerical)
  - Position: standing with feet 25–30 cm apart while exhaling in a comfortable standing position, evenly distribute weight.
  - Measure at the midpoint between the lower ribs and the upper iliac bones.

### **Stroke-related factors**

1. Initial National Institute of Health Stroke Scale (numerical)
  - Based only on the neurological symptoms caused by index stroke.
2. Stroke subtype (categorical)
  - Following the TOAST classification system.<sup>2</sup>
  - Categories: Large artery atherosclerosis, cardiogenic embolism, small vessel disease, and others.
3. Circulatory territory (categorical) & Involved side (categorical)
  - Records responsible lesion of the index stroke.

- If a lesion has invaded diverse territories, it is indicated in multiple.
- Angiography findings can be applied.
- Categories: anterior circulation, posterior circulation, and both for circulatory territory. Right, left, and bilateral for the involved side.

#### 4. Acute intravenous/intraarterial treatments

- Describe all treatments performed within 48 hours of admission.
- Categories: None, intravenous tissue plasminogen activator, intraarterial thrombolysis and intravenous/intraarterial combined.

#### 5. Onset type (categorical) and time to arrival (numerical)

- Clear onset: When the last known normal time (LNT) and the first known abnormal time (FAT) of neurological symptoms are the same before the onset of stroke (LNT=FAT).
- Unclear onset: Wake up stroke or Daytime unwitnessed stroke.
- Time to arrival = LNT to hospital arrival

### **Laboratory findings (numerical) and blood pressure (numerical)**

- Laboratory findings were recorded as the results of the first examination after admission and in the case of in-hospital strokes, as the first examination results after the onset of newly developed symptoms. (Except for serum lipid levels)
- For serum lipid levels, the measurement should be conducted after an 8 hours-empty stomach.
- Initial blood pressure: record the first blood pressure measured in a stable state.

### **Comorbidities (Risk factors)**

#### 1. Stroke (categorical)

- Based on patient's or families' statements or medical records.
- Complete stroke is defined as a sudden onset of localized brain dysfunction lasting more than 24 h.
- Silent “lacunar” infarction is not a target.
- Categories: None, Ischemic stroke, hemorrhagic stroke, mixed stroke, unknown.

#### 2. Transient ischemic attack (categorical)

- Based on patient's or families' statements or medical records.
- It is defined as a sudden onset of localized brain dysfunction lasting less than 24 h and then completely recovers.

#### 3. Cardiac artery disease (categorical)

- Based on patient's or families' statements or medical records.
- History of myocardial infarction.
- Evidence of asymptomatic myocardial infarction and myocardial ischemia on electrocardiogram or echocardiography.
- History of stable or unstable angina.
- History of coronary angioplasty or surgery.

4. Peripheral artery diseases (categorical)

- Having been diagnosed with peripheral arterial disease in a hospital.
- History of surgical or interventional treatment for peripheral arterial disease.

5. Hypertension (categorical): If one or more of the following apply.

- Categories: None, known, and diagnosed at admission.
- He was diagnosed with hypertension in a hospital and had a history of taking antihypertensive drugs (including cases that stopped taking medication) (known).
- Having been told that high blood pressure should be treated at the hospital, the patient has never taken any medications (known).
- Blood pressure higher than 140/90 was measured more than twice in self-measurement or health checkups even without a history of HTN (known).
- In cases of high blood pressure of 140/90 mmHg or higher twice or more during hospitalization (in case of acute stroke, blood pressure was measured twice after neurological stabilization) (diagnosed at admission).
- Prescribed antihypertensive medications at the time of discharge (diagnosed at admission).

6. Diabetes (categorical): If one or more of the following apply.

- Patients were diagnosed with diabetes in a hospital and had a history of taking oral diabetes medication or insulin treatment (including cases that stopped taking medication or insulin treatment) (known).
- Having been told that high blood sugar should be treated at the hospital, the patient has never taken any medications (known).
- Fasting plasma blood glucose level of 126 mg/dl or higher for more than 8 hours during hospitalization (diagnosed at admission).
- HbA1c 6.5 or higher (diagnosed at admission).
- A random glucose level of 200 mg/dl or higher with the following symptoms: polydipsia, polyuria, and unexplained weight loss during hospitalization (diagnosed at admission).
- The glucose level was 200 mg/dl or more 2 h after the 75 g oral glucose tolerance test.

- Prescribed oral diabetes medications or insulin treatment at the time of discharge.
- In case of acute stroke, blood pressure measured twice after neurological stabilization.

7. Dyslipidemia (categorical): If one or more of the following apply.

- The patient was diagnosed with dyslipidemia in a hospital and had a history of taking lipid-lowering agents (known).
- Having been told that a high lipid level should be treated at the hospital, the patient has never taken any medications (known).
- LDL C  $\geq$  100 mg/dl with coronary artery disease or coronary artery-like disease (diabetes, peripheral artery disease, abdominal aortic aneurysm, and ischemic stroke due to atherosclerosis) (diagnosed at admission).
- LDL C  $\geq$  130 mg/dl with at least two risk factors (smoking, hypertension, HDL-C  $<$  40 mg/dl, family history of premature CHD [CHD in male first-degree relative  $<$  55 years old; CHD in female  $<$  65 years old], age [ $\geq$  45 years old for men or  $\geq$  55 years old for women] (diagnosed at admission).
- LDL C  $\geq$  160 mg/dl with at least one risk factor (as above) (diagnosed at admission).
- The test results were determined after fasting for at least 8 h after hospitalization.

8. Atrial fibrillation (categorical)

- Having been diagnosed with atrial fibrillation in a hospital (known).
- When atrial fibrillation is observed during hospitalization with electrocardiogram, echocardiography, or Holter monitoring (diagnosed at admission).

9. Smoker (categorical)

- Current smoker: Have smoked in the past month.
- Ex-smoker: Smoking cessation for more than 1 month. The period of smoking cessation was divided into fewer or more than five years.

10. Previous administration of antiplatelet/anticoagulant (categorical)

- It is defined as a case of regular use within the last month.
- Antiplatelet: All kinds of medications are categorized as antiplatelet agents, including aspirin, clopidogrel, and ticlopidine.
- Anticoagulant: Warfarin, low-molecular weight heparin, and all kinds of medications were categorized as non-vitamin K antagonist oral anticoagulants including dabigatran, apixaban, rivaroxaban, etc.

11. Potential sources of cardiogenic embolism (categorical)

- Potential sources of cardiogenic embolism definition from the TOAST classification.<sup>2</sup>

High- and medium-risk sources are listed as follows.

| High risk sources                                         | Medium risk sources                         |
|-----------------------------------------------------------|---------------------------------------------|
| Mechanical prosthetic valve                               | Mitral valve prolapse                       |
| Mitral stenosis with atrial fibrillation                  | Mitral annulus calcification                |
| Atrial fibrillation (other than lone atrial fibrillation) | Mitral stenosis without atrial fibrillation |
| Left atrial/atrial appendage thrombus                     | Left atrial turbulence (smoke)              |
| Sick sinus syndrome                                       | Atrial septal aneurysm                      |
| Recent myocardial infarction (<4 week)                    | Patent foramen ovale                        |
| Left ventricular thrombus                                 | Atrial flutter                              |
| Dilated cardiomyopathy                                    | Lone atrial fibrillation                    |
| Akinetic left ventricular segment                         | Bioprosthetic cardiac valve                 |
| Atrial myxoma                                             | Nonbacterial thrombotic endocarditis        |
| Infective endocarditis                                    | Congestive heart failure                    |
|                                                           | Hypokinetic left ventricular segment        |
|                                                           | Myocardial infarction (>4 weeks, <6 months) |

#### Dependent variable (categorical)

- Categories: Favorable (mRS 0 and 1) and unfavorable (mRS > 2).
- The time of investigation is 3-months from the date of hospitalization.
- Outpatient clinics or telephone follow-ups; in some cases, a period of  $\pm 1$  month can be given.
- Inquire about the current functional level, degree of support for daily activity, spatial extent of daily living, whether the pre-morbid standard of living is being maintained and returning to work.
- Adverse events: Investigate the stroke recurrence, cardiovascular event, or other death.

#### References for Supplementary Document 1.

1. Korean Stroke Society. Korean stroke registry guideline. [Http://www.Strokedb.Or.Kr/bbs/index.Asp?Bbs\\_code=open\\_material](http://www.Strokedb.Or.Kr/bbs/index.Asp?Bbs_code=open_material). Accessed 03 august 2021. 2017
2. Adams HP, Jr., Bendixen BH, Kappelle LJ, et al. Classification of subtype of acute ischemic stroke. Definitions for use in a multicenter clinical trial. Toast. Trial of org 10172 in acute stroke treatment. *Stroke* 1993;24:35-41.

**Supplementary Document S2.** R code and corresponding results for this study (separate file)
